# Supplementary material for: Peptidines: glycine-amidine-based oligomers for solution- and solid-phase synthesis
Source: Royal Society of Chemistry journal article supplement (doi:10.1039/c5sc03882k), 2016-01-01

# **Peptidines: Glycine-amidine-based oligomers for solution- and solid-phase synthesis**

Julian Vastl, Rendy Kartika, Kichul Park, Art E. Cho, David A. Spiegel\*  
Department of Chemistry, Yale University, 225 Prospect Street, New Haven, CT 06520

## Supporting Information

### INDEX

|                                                                          |      |
|--------------------------------------------------------------------------|------|
| 1. General Procedures                                                    | S-2  |
| 2. List of Abbreviations                                                 | S-3  |
| 3. Amidine Nomenclature                                                  | S-4  |
| 4. Supporting, Figures and Tables                                        | S-5  |
| 5. Solution-Phase Procedures                                             | S-8  |
| 6. Solid-Phase Procedures                                                | S-22 |
| 7. Calculations                                                          | S-32 |
| 8. Crystallography                                                       | S-33 |
| 9. References                                                            | S-34 |
| 10. Catalogue of $^1\text{H}$ $^{13}\text{C}$ and Analytical HPLC traces | S-35 |

## 1. General Procedure:

Starting materials were used as received unless otherwise noted. All reactions were performed in an inert, dry atmosphere of nitrogen in oven-dried glassware using anhydrous solvents unless noted otherwise. Reagent grade solvents were used for extractions and flash chromatography. Reaction progress was checked by analytical thin-layer chromatography (TLC, Merck silica gel 60 F-254 plates). The plates were then monitored with UV illumination. Purification was carried out on a Teledyne Isco CombiFlash Rf 200 using both silica gel (230-400 mesh) or C18. The solvent compositions reported for all chromatographic separations are on a volume/volume (v/v) basis. Infrared (IR) spectra were recorded on a Thermo Nicolet 6700 FT-IR Spectrometer. Proton and Carbon nuclear magnetic resonance ( $^1\text{H}$  or  $^{13}\text{C}$  NMR) spectra were recorded on 400, 500, 600 or 800 MHz magnets from both Bruker and Varian. Chemical shifts are expressed in parts per million ( $\delta$  scale) downfield from tetramethylsilane and are referenced to residual proton in the NMR solvent. Data are presented as follows: chemical shift, multiplicity (s = singlet, d = doublet, t = triplet, sept = septuplet, m = multiplet and/or multiple resonances), coupling constants in Hertz (Hz), and integration. Unless otherwise noted,  $^1\text{H}$  NMR spectra are reported in parts per million (ppm) on the  $\delta$  scale relative to  $\text{CDCl}_3$  ( $\delta$  7.26) and  $^{13}\text{C}$  NMR spectra are reported in parts per million (ppm) on the  $\delta$  scale relative to  $\text{CDCl}_3$  ( $\delta$  77.00). LC-MS analyses were performed on a Waters UPLC/MS instrument equipped with a RP-C18 column (1.7  $\mu\text{m}$  particle size, 2.1x50 mm), dual atmospheric pressure chemical ionization (API)/electrospray(ESI) mass spectrometry detector, and photodiode array detector. Preparatory HPLC was performed with a SunFire Prep C18 OBD 10  $\mu\text{m}$  19x150 mm reverse-phase column as the stationary phase. Water and Acetonitrile both buffered with either 0.1% formic acid or 0.1% trifluoroacetic acid. The HPLC fractions were combined and lyophilized to give the corresponding peptidines as a freebase or salt depending on the presence of basic functional groups. Analytical HPLC was performed with a SunFire C18 5  $\mu\text{m}$  4.6x150 mm reverse-phase column as the stationary phase. Water and acetonitrile both buffered with 0.1% formic acid were used as the mobile phase.

## 2. List of Abbreviations:

Ac = Acetyl  
Bn = Benzyl  
Boc = tert-Butyloxycarbonyl  
Cy = Cyclohexyl  
DCM = Dichloromethane  
DIPA = Diisopropylamine  
DMAP = Dimethylaminopyridine  
DMF = Dimethylformamide  
DMSO = dimethylsulfoxide  
Et = Ethyl  
FA = Formic acid  
Fmoc = Fluorenylmethyloxycarbonyl  
iPr = Isopropyl  
IR = Infrared Radiation  
LC/MS = Liquid chromatography/Mass Spectrometry  
Me = Methyl  
Ms = Mesyl  
NMM = N-Methyl morpholine  
NMP = N-Methyl pyrrolidinone  
NMR = Nuclear Magnetic Resonance  
Ph = Phenyl  
tBu = tert Butyl  
SPPS = Solid Phase Peptide Synthesis  
TFA = Trifluoroacetic acid  
THF = Tetrahydrofuran  
TMB = trimethylbenzene  
Tol = Toluyl  
Ts = Tosyl

### 3. Amidine Nomenclature:

We use IUPAC numbering when referring to substituents off the amidine bonds<sup>12</sup>:

$N^1$  refers to the singly-bonded nitrogen in the amidine

$N^2$  Refers to the doubly-bonded nitrogen in the amidine

$N^2$  refers to this atom

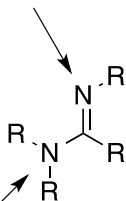

$N^1$  refers to this atom

## 4. Supporting Figures and Tables:

### SI Figure 1: *N*<sup>2</sup>-Alkyl amidine synthesis

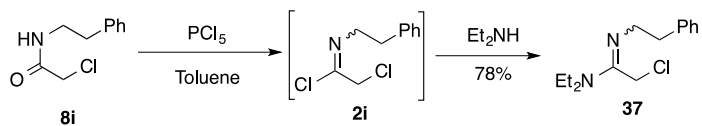

### SI Figure 2: Cyclization of *N*<sup>2</sup>-Carbamate Amidines

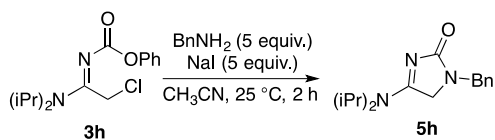

### SI Figure 3: Resin Optimization

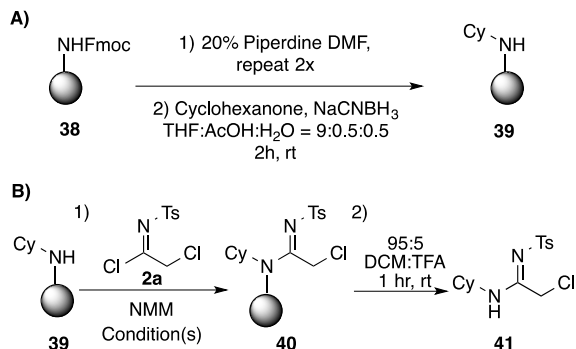

| Entry          | Condition    | Isolated Yield |
|----------------|--------------|----------------|
| 1              | DCM, 3h      | 25%            |
| 2              | NMP, 3h      | 70%            |
| 3 <sup>a</sup> | DMAP, NMP 3h | -              |
| 4              | NMP, O/N     | 90%            |

Reactions were run using 200 mg of resin and 4 mL of 0.2 M imidoyl chloride, 0.6 M of NMM, 20 mg of DMAP added to reaction vessel. A mixture of products was observed after resin cleavage by LCMS and **41** was not isolated for this entry.

**SI Figure 4: Cyclization to form 27.**

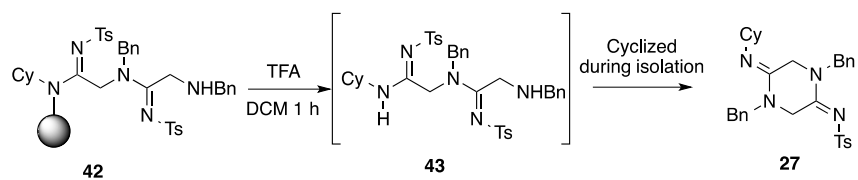

**SI Figure 5: Variable Temperature NMR of 11 in *d*6-DMSO**

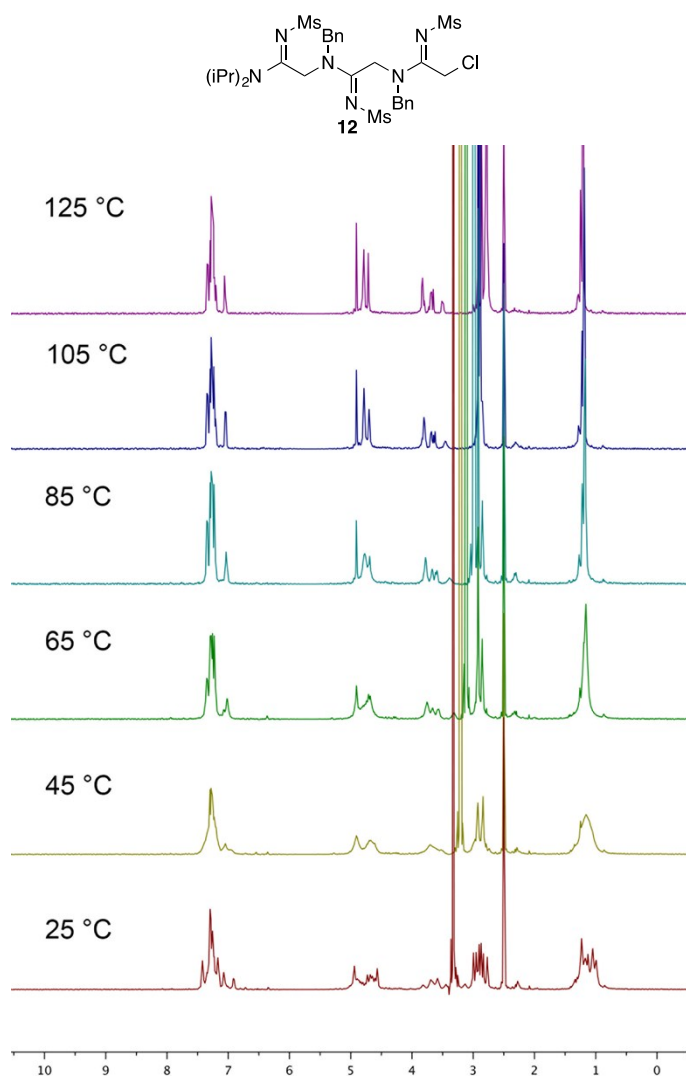

**SI Figure 6: View of 28 Looking Down the Peptidine Axis.**

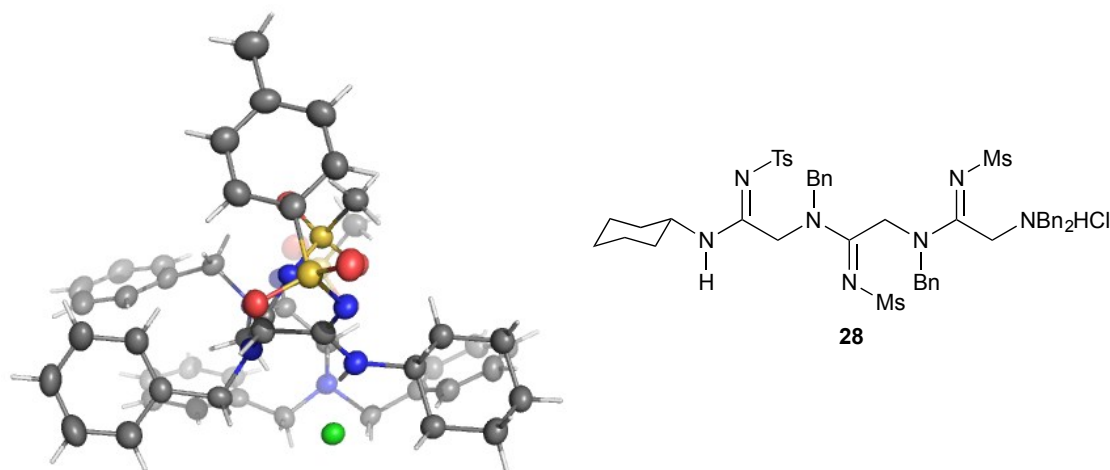

**SI Figure 6:** Crystal structure of **28** looking down peptidine axis with the C-terminus coming out of the page. The C-terminal cyclohexane is in the lower right corner. The chemical structure of **28** is shown on the right for clarity.

**SI Figure 7: Stability of Peptidines in PBS**

| Entry | Compound      | Observed Hydrolysis | Half-life                 |
|-------|---------------|---------------------|---------------------------|
| 1     | <br><b>6b</b> | No                  | No decomp observed (14 d) |
| 2     | <br><b>33</b> | No                  | No decomp observed (14 d) |
| 3     | <br><b>35</b> | Yes                 | 4.5 days                  |

**SI Figure 7:** Peptidines were added from DMSO stocks into PBS (final conc. 100  $\mu$ M) at 25° C with p-methylbenzhydrol as internal standard. Decomposition half-lives were measured by regular analysis by LCMS of the buffer followed by integrating the 254 nm channel of peptidine compared to internal standard. Samples were evaluated up to 14 days.

## 5. Solution Phase Procedures

Imidoyl chlorides, **2a-f**, used in Table 1, were synthesized immediately before use; procedures regarding the production and reactions these compounds can be found below (See procedures for **2a-f**).

For the rest of this manuscript, imidoyl chlorides (**2a-f**) were prepared on large scale and stored as stock solutions. Stock solutions were prepared on 5-50 mmol scale stock stored in a bomb in a desiccator. Imidoyl chloride stock solutions were ~1M (0.85-1.05 M depending on batch) and ranged from 85-99% purity by <sup>1</sup>H NMR integration. The major byproduct was unreacted starting material for the spectra that were < 95% pure, which, in small quantities has no observable effect on aminidation procedures.

### General Procedure for Imidoyl Chloride Stock Solution Preparation:

PCl<sub>5</sub> (11.45 g, 55 mmol, 1.1 equivalents) was added to 200 mL of anhydrous benzene containing α-Chloroacetamides **8a-h** (50 mmol) and was refluxed for 14 hours. The solution was allowed to cool, the solvent was removed by rotary evaporation at 40 °C to give several mL of a thick oil. The solution was allowed to sit on high vacuum for 24 hours to remove any volatile byproducts. Anhydrous DCM (44 mL for 50 mmol imidoyl chloride scale) was then added and the new stock solution was cannulated to a flame-dried bomb. 100 uL of the final solution was transferred to a 5 mL flame-dried flask and the solvent was removed by rotary evaporation. 5 uL of trimethylbenzene was added as an internal standard followed by <sup>1</sup>H NMR to calculate the final concentration of the imidoyl chloride. Stock solutions varied from 0.85-1.05 M in DCM. The bombs were kept in a dry-box stored over CaSO<sub>4</sub> and maintained purity for months. Production of **2a** is produced identically to the above procedure; production of **2b** is identical to above procedure except it is a white crystalline solid; production of **2c** and **2e** was prepared on 20 mmol scale; production of **2d** was carried out on the 5 mmol scale; production of **2f**, **2g**, and **2h** were carried out on the 10 mmol scale.

### Procedure for the preparation of 2-chloro-*N*-tosylacetamide (**8a**):

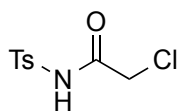

Chloroacetyl chloride (72 mL, 900 mmol) was added to *p*-toluenesulfonamide (51.4 g, 300 mmol) and allowed to reflux overnight (14 h) with vigorous stirring. After allowing the solution to cool to room temperature, 200 mL of hexanes was added and the reaction, while being capped to prevent the condensation of water, was transferred to a -20 °C freezer and after an hour precipitates were observed. The solution was then filtered, washed with hexanes (2 x 200 mL) and pentane (2 x 200 mL) to give 66.2 g of **2a** as a white crystalline solid in 89% yield. <sup>1</sup>H NMR (500 MHz, Chloroform-*d*) δ 9.05 (s, 1H), 8.00-7.94 (m, 2H), 7.39-7.31 (m, 2H), 4.02 (s, 2H), 2.45 (s, 3H); <sup>13</sup>C NMR (126 MHz, Chloroform-*d*) δ 163.99, 145.75, 134.62, 129.69, 128.62, 77.25, 77.00, 76.75, 42.20, 21.70; IR 1716, 1447, 1350, 1170, 1087, 860, 660, 550 cm<sup>-1</sup>; HRMS Exact Mass (C<sub>9</sub>H<sub>10</sub>ClNO<sub>3</sub>S + H): calculated = 247.0070, measured = 247.0145.

### Procedure for the preparation of 2-chloro-*N*-(methanesulfonyl)acetamide (**8b**):

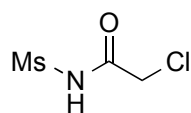

Chloroacetyl chloride (75 mL, 943 mmol) was added methanesulfonamide (30 g, 315 mmol) and allowed to reflux overnight (14 h) with vigorous stirring. The reaction, while being capped to prevent the condensation of water, was then transferred to a -20° C freezer for 30 minutes causing the product to precipitate. The reaction was filtered, washed with toluene (2 x 200 mL) and hexane (2 x 200 mL). This filtration process was carried out as fast as possible to prevent contamination with atmospheric water. The residual solid was then exposed to high vacuum for 4 hours to remove any residual hydrogen chloride to give 49.9 g of a white crystalline solid in 92% yield. Due to the hygroscopic nature of **8b** it was stored in a sealed container over calcium sulfate. **<sup>1</sup>H NMR** (400 MHz, Chloroform-*d*) δ 8.70 (s, 1H), 4.15 (s, 2H), 3.35 (s, 3H); **<sup>13</sup>C NMR** (126 MHz, Chloroform-*d*) δ 165.32, 42.40, 41.78; **IR** 3230, 3174, 1716, 1477, 1443, 1404, 1334, 1176, 1129, 997, 980, 884, 790, 554, 512 cm<sup>-1</sup>; **HRMS** Exact Mass (C<sub>3</sub>H<sub>6</sub>ClNO<sub>3</sub>S + H): calculated = 171.9830, measured = 171.9882.

### Procedure for the preparation of 2-chloro-*N*-(isopropylsulfonyl)acetamide (**8c**):

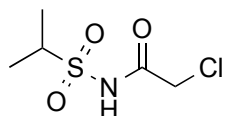

Chloroacetyl chloride (11.9 mL, 150 mmol) was added to isopropylsulfonamide (6.15 g, 50 mmol) and allowed to reflux overnight (14 h) with vigorous stirring. After allowing the solution to cool to room temperature, and an off-white precipitate was observed. The solution was then filtered, and the solid was washed extensively with hexanes (6 x 100 mL) providing a white crystalline solid. This material was exposed to high vacuum for 4 hours in order to remove any residual hydrogen chloride to provide 9.33 g of **8c** in 93.5% yield. **<sup>1</sup>H NMR** (400 MHz, Acetone-*d*<sub>6</sub>) δ 4.30 (s, 2H), 3.72 (h, *J* = 6.9 Hz, 1H), 1.36 (d, *J* = 6.9 Hz, 6H); **<sup>13</sup>C NMR** (101 MHz, Acetone-*d*<sub>6</sub>) δ 166.32, 54.29, 43.44, 16.00; **IR** = 1720, 1446, 1402, 1335, 887, 517 cm<sup>-1</sup>; **HRMS** Exact Mass (C<sub>5</sub>H<sub>10</sub>ClNO<sub>3</sub>S + H): calculated = 200.0143, measured = 200.0192.

### Procedure for the preparation of 2-chloro-*N*-((5-chlorothiophen-2-yl)sulfonyl)acetamide (**8d**):

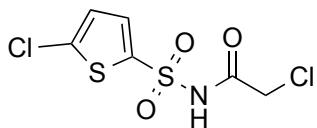

**8d** was prepared with modification of a previously published method<sup>1</sup>. 5-Chlorothiophene-2-sulfonamide (5 g, 25.3 mmol) was added to isopropyl acetate (56 mL), triethylamine (3.8 mL, 63.3 mmol) and 4-dimethylaminopyridine (20.8 mg 0.253 mmol). This solution was heated to 55° C and a solution of chloroacetylchloride (2.21 mL 27.8 mmol) in toluene (18.5 mL) was added drop-wise over an hour. The reaction was allowed to stir for another hour followed by the addition of water (30 mL) and 1 M HCl (30 mL). The reaction was then cooled, the organic layer was then separated and the aqueous phase was washed 2x 75 mL with isopropyl acetate. The combined organic layers were dried over sodium sulfate and concentrated by vacuum to provide 5.47 g of **8d** in 79% yield. **<sup>1</sup>H NMR** (400 MHz, Acetone-*d*<sub>6</sub>) δ 7.72 (d, *J* = 4.1 Hz, 1H), 7.21 (d, *J* = 4.1 Hz, 1H), 4.30 (s, 2H); **<sup>13</sup>C NMR** (101 MHz, Acetone-*d*<sub>6</sub>) δ 165.67, 139.08, 138.38, 135.58, 128.40, 43.47; **IR** = 1703, 1407, 1366, 1148, 1091, 1040, 996, 870, 798, 609, 562, 535 cm<sup>-1</sup>; **HRMS** Exact Mass (C<sub>6</sub>H<sub>5</sub>Cl<sub>2</sub>NO<sub>3</sub>S + H): calculated = 273.9161, measured = 273.9178.

**Procedure for the preparation of 2-chloro-*N*-phenylacetamide (8e):**

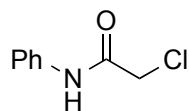

**8e** was prepared by the procedure in the following reference. Proton spectra matched published values.<sup>2</sup>

**Procedure for the preparation of 2-chloro-*N*-(4-nitrophenyl)acetamide (8f):**

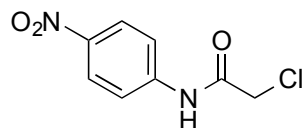

**8f** was prepared by the procedure in the following reference. Proton spectra matched published values.<sup>3</sup>

**Procedure for the preparation of phenyl (2-chloroacetyl)carbamate (8g):**

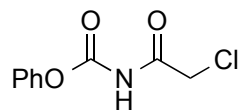

Oxalyl chloride (4.3 mL, 50 mmol) was added to a stirring suspension of chloroacetamide (4.68g, 50 mmol) in anhydrous dichloroethane (200 mL, dried over 4Å molecular sieves overnight). The reaction was then heated to a vigorous reflux for 2 hours. The reaction was then cooled to room temperature, followed by the addition of phenol (4.7 g, 50 mmol). The reaction was then heated to 50 °C and allowed to stir overnight (14 h). The solvent was removed by vacuum and the residual white solid was recrystallized in 30-40 mL of boiling toluene. The white solid was washed with 3 x 150 mL of pentane and dried under high vacuum to provide 8.8 g of **8g** in 82% yield. **<sup>1</sup>H NMR** (500 MHz, Acetone-*d*<sub>6</sub>) δ 10.24 (s, 1H), 7.44 (d, *J* = 8.1 Hz, 2H), 7.29 (d, *J* = 7.6 Hz, 1H), 7.21 (d, *J* = 7.9 Hz, 2H), 4.66 (s, 2H); **<sup>13</sup>C NMR** (126 MHz, Acetone-*d*<sub>6</sub>) δ 166.86, 150.50, 150.28, 129.49, 126.13, 121.59, 44.16, 44.14; **IR** = 1770, 1527, 1482, 1220, 1149, 976, 817, 687, 539 cm<sup>-1</sup>; **HRMS** Exact Mass (C<sub>9</sub>H<sub>8</sub>ClNO<sub>3</sub> + H): calculated = 214.0193, measured = 214.0187.

**Procedure for the preparation of 2-chloro-*N*-(dibenzylcarbamoyl)acetamide (8h):**

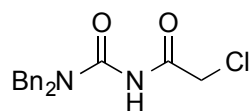

Oxalyl chloride (10.4 mL, 120 mmol) was added to a stirring suspension of chloroacetamide (11.2 g 120 mmol) in anhydrous dichloroethane (450 mL, dried over 4Å molecular sieves overnight). The reaction was then heated to reflux overnight (14 h). The reaction was cooled to room temperature, followed by the addition of dibenzylamine (23.2 mL, 120 mmol). The reaction was stirred for 2 hours at room temperature and was then transferred to a separatory funnel, and the organic phase was washed with 300 mL of 1 M HCl twice. The organic phase was then dried over sodium sulfate and removed under vacuum to provide 32.1 g of **8h** in 84.7% yield. **<sup>1</sup>H NMR** (400 MHz, Chloroform-*d*) δ 8.01 (s, 1H), 7.44-7.31 (m, 5H), 5.21 (s, 2H), 4.47 (s, 2H); **<sup>13</sup>C NMR** (100 MHz, Chloroform-*d*) δ 166.46, 150.95, 134.43, 128.91, 128.74, 128.57, 68.47, 43.55; **IR** = 3219, 1716, 1662, 1527, 1427, 1235, 1207, 1138, 963, 755, 739, 503 cm<sup>-1</sup>; **HRMS** Exact Mass (C<sub>17</sub>H<sub>18</sub>ClN<sub>2</sub>O<sub>2</sub> + H): calculated = 317.1052, measured = 317.0973.

**Procedure for the preparation of 2-chloro-*N*-phenethylacetamide (8i):**

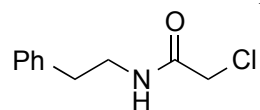

**8i** was prepared by the procedure in the following reference. Proton spectra matched published values.<sup>3</sup>

**Procedure for the preparation of (*E*)-2-chloro-*N,N*-diisopropyl-*N'* tosylacetimidamide (**3a**):**

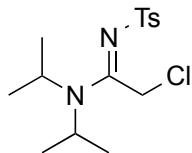

**2a** (247 mg, 1 mmol) was dissolved in benzene (4 mL) and  $\text{PCl}_5$  (228 mg, 1.1 mmol) was added. The reaction was refluxed under nitrogen for 1 hour. The solvent was then removed by rotary evaporation, producing a pale-yellow oil, which was then exposed to high vacuum for 30 minutes to remove any volatile byproducts. Dichloromethane (10 mL) was then added, the reaction was cooled to 0 °C by an ice bath, followed by the drop-wise addition of diisopropylamine (1.4 mL, 10 mmol). The ice bath was then removed and the reaction was allowed to stir for 2 hours at room temperature. The solvent was removed by vacuum and the residual material was directly loaded onto a silica gel column and purified using an automated purification system (Teledyne Isco, Inc.) on a normal phase column using a 0-40% gradient of ethyl acetate in hexanes to provide 307 mg of **5a** in 93% yield.  $^1\text{H NMR}$  (500 MHz, Chloroform-*d*)  $\delta$  7.81 (d,  $J$  = 8.2 Hz, 2H), 7.25 (d,  $J$  = 8.4 Hz, 2H), 4.72 (s, 2H), 4.17 (sept,  $J$  = 6.6 Hz, 1H), 3.55 (sept,  $J$  = 6.8 Hz, 1H), 2.39 (s, 3H), 1.31 (d,  $J$  = 6.8 Hz, 6H), 1.26 (d,  $J$  = 6.6 Hz, 6H);  $^{13}\text{C NMR}$  (126 MHz, Chloroform-*d*)  $\delta$  158.40, 141.96, 140.69, 129.08, 126.16, 50.77, 48.40, 36.40, 21.42, 20.37, 19.54; **IR** = 1553, 1440, 1473, 1261, 1132 1078, 938, 786, 723, 548  $\text{cm}^{-1}$ ; **HRMS** Exact Mass ( $\text{C}_{15}\text{H}_{23}\text{ClN}_2\text{O}_2\text{S}^+$  H): calculated = 331.1242, measured = 331.1266.

**Procedure for the preparation (*E*)-2-chloro-*N,N*-diisopropyl-*N'*-(methylsulfonyl)-acetimidamide (**3b**):**

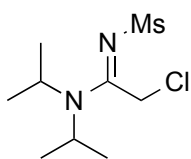

**3b** was synthesized under analogous identically to **3a**. The crude material was purified using an automated purification system (Teledyne Isco, Inc.) on a normal phase column using a 0-5% gradient in methanol in dichloromethane to provide 219 mg of **3b** a 86% yield.  $^1\text{H NMR}$  (400 MHz, Chloroform-*d*)  $\delta$  4.60 (s, 2H), 4.15 (sept,  $J$  = 6.6 Hz, 1H), 3.60 (sept,  $J$  = 6.7 Hz, 1H), 3.01 (d,  $J$  = 0.5 Hz, 3H), 1.43 (d,  $J$  = 6.8 Hz, 6H), 1.26 (d,  $J$  = 6.6 Hz, 6H);  $^{13}\text{C NMR}$  (100 MHz, Chloroform-*d*)  $\delta$  158.79, 50.67, 48.26, 43.27, 36.80, 20.31, 19.55; **IR** = 1559, 1374, 1269, 1113, 1054, 942, 805, 516  $\text{cm}^{-1}$ ; **HRMS** Exact Mass ( $\text{C}_9\text{H}_{19}\text{ClN}_2\text{O}_2\text{S}^+$  H): calculated = 255.0929, measured = 255.0942.

**Procedure for the preparation of (*E*)-2-chloro-*N,N*-diisopropyl-*N'*-(isopropylsulfonyl)-acetimidamide (**3c**):**

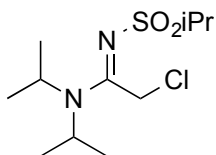

**3c** was synthesized and purified under analogous conditions to **3a** to give 222 mg of **3c** in 88% yield.  $^1\text{H NMR}$  (500 MHz, Chloroform-*d*)  $\delta$  4.61 (s, 2H), 4.14 (sept,  $J$  = 6.6 Hz, 1H), 3.62-3.53 (m, 1H), 3.10 (sept,  $J$  = 6.8 Hz, 1H), 1.39 (d,  $J$  = 6.9 Hz, 12H), 1.35 (d,  $J$  = 6.8 Hz, 6H), 1.22 (d,  $J$  = 6.6 Hz, 6H);  $^{13}\text{C NMR}$  (126 MHz, Chloroform-*d*)  $\delta$  159.78, 54.27, 50.56, 47.91,

37.06, 20.25, 19.51, 16.39; **IR** = 1557, 1451, 137, 1289, 1248, 1108, 1058, 943, 795, 735  $\text{cm}^{-1}$ ; **HRMS** Exact Mass ( $\text{C}_{11}\text{H}_{23}\text{ClN}_2\text{O}_2\text{S} + \text{H}$ ): calculated = 283.1242, measured = 283.1247.

**Procedure for the preparation of (*E*)-2-chloro-*N'*-((5-chlorothiophen-2-yl)sulfonyl)-*N,N*-diisopropylacetimidamide (**3d**):**

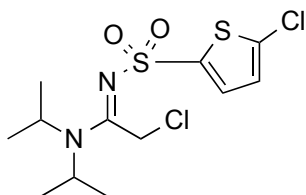

**3d** was synthesized and purified under conditions analogous to **3a** to give 313 mg of **3d** in 88% yield. **<sup>1</sup>H NMR** (400 MHz, Chloroform-*d*)  $\delta$  7.41 (d,  $J$  = 4.0 Hz, 1H), 6.85 (d,  $J$  = 4.0 Hz, 1H), 4.67 (s, 2H), 4.19 (sept,  $J$  = 6.6 Hz, 1H), 3.70-3.58 (m, 1H), 1.42 (d,  $J$  = 6.8 Hz, 6H), 1.30 (d,  $J$  = 6.6 Hz, 6H); **<sup>13</sup>C NMR** (100 MHz, Chloroform-*d*)  $\delta$  158.74, 143.02, 135.42, 129.09, 129.08, 129.06, 125.82, 51.18, 48.79, 36.36, 20.29, 19.56, 19.54; **IR** = 1555, 1416, 1375, 1295, 1129, 1080, 989, 792, 617, 538  $\text{cm}^{-1}$ ; **HRMS** Exact Mass ( $\text{C}_{12}\text{H}_{18}\text{Cl}_2\text{N}_2\text{O}_2\text{S}_2 + \text{H}$ ): calculated = 357.0260, measured = 357.0271.

**Procedure for the preparation of (*E*)-2-chloro-*N,N*-diisopropyl-*N'*-(4-nitrophenyl)-acetimidamide (**3e**):**

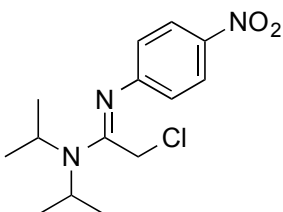

**3e** was synthesized under analogous conditions to **3a** with the following changes. Reaction was run at 2 mmol scale and was purified using an automated purification system (Teledyne Isco, Inc.) on a normal phase column using a 0-10% gradient of methanol in dichloromethane to provide 430 mg of **3e** a 72% yield. **<sup>1</sup>H NMR** (500 MHz, Methylene Chloride-*d*<sub>2</sub>)  $\delta$  8.07-7.99 (m, 2H), 6.77-6.70 (m, 2H), 3.86 (s, 3H), 3.81-3.74 (m, 2H), 1.29 (d,  $J$  = 6.9 Hz, 12H); **<sup>13</sup>C NMR** (126 MHz,  $\text{CD}_2\text{Cl}_2$ )  $\delta$  157.61, 151.71, 142.39, 125.57, 122.47, 36.66, 20.73; **IR** = 1610, 1575, 1499, 1329, 1277, 1142, 1106, 855, 762  $\text{cm}^{-1}$ ; **HRMS** Exact Mass ( $\text{C}_{14}\text{H}_{20}\text{ClN}_3\text{O}_2 + \text{H}$ ): calculated = 298.1317, measured = 298.1323.

**Procedure for the preparation of (*E*)-2-chloro-*N,N*-diisopropyl-*N'*-phenylacetimidamide (**3f**):**

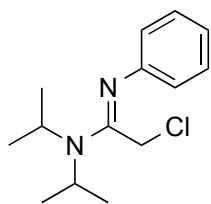

**3f** was synthesized under analogous conditions to **3a** with the following changes. Chlorination with  $\text{PCl}_5$  was run at room temperature for 3 hours, and the treatment with diisopropylamine was allowed to stir overnight (14 h). **3f** was purified using an automated purification system (Teledyne Isco, Inc.) on a normal phase column using a 0-40% gradient of ethyl acetate in hexanes to provide 176 mg of **3f** in 70% yield. **<sup>1</sup>H NMR** (400 MHz, Chloroform-*d*)  $\delta$  7.34-7.22 (m, 2H), 7.01-6.91 (m, 1H), 6.84-6.76 (m, 2H), 3.96 (s, 2H), 3.89-3.76 (m, 2H), 1.41 (d,  $J$  = 6.8 Hz, 12H); **<sup>13</sup>C NMR** (101 MHz, Chloroform-*d*)  $\delta$  150.78, 150.61, 128.81, 121.77, 121.24, 53.40, 47.61, 35.38, 20.58; **IR** = 1609, 1588, 1456, 1442, 1342, 1250, 1142, 1043 805, 768, 697, 599, 493  $\text{cm}^{-1}$ ; **HRMS** Exact Mass ( $\text{C}_{14}\text{H}_{21}\text{ClN}_2 + \text{H}$ ): calculated = 253.1467, measured = 253.1472.

**Procedure for the preparation of phenyl (*E*)-(2-chloro-1-(diisopropylamino)-ethylidene)carbamate (**3g**):**

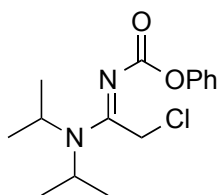

**3g** was synthesized under similar conditions to **3a** with the following changes. Chlorination was allowed to stir overnight (14 hours) before removal of solvent. The crude product was purified using an automated purification system (Teledyne Isco, Inc.) on a normal phase column using a 0-50% gradient of ethyl acetate in hexanes to provide 233 mg of **3g** in 79 % yield. <sup>1</sup>H NMR (501 MHz, Chloroform-*d*) δ 7.44 (t, *J* = 7.9 Hz, 2H), 7.28-7.21 (m, 3H), 4.62 (s, 2H), 4.25-4.19 (m, 1H), 3.83-3.75 (m, 1H), 1.39 (d, *J* = 8.9 Hz, 12H); <sup>13</sup>C NMR (126 MHz, Chloroform-*d*) δ 161.63, 159.46, 152.21, 128.88, 124.67, 121.77, 50.10, 48.13, 35.50, 20.53, 19.26; IR = 1678, 1560, 1482, 1445, 1374, 1246, 1188, 1161, 1153, 1051, 980, 761, 692, 576, cm<sup>-1</sup>; HRMS Exact Mass (C<sub>15</sub>H<sub>21</sub>ClN<sub>2</sub>O<sub>2</sub> + H): calculated = 297.1364, measured = 297.1354.

**Procedure for the preparation of (*E*)-2-chloro-*N'*-(dibenzylcarbamoyl)-*N,N*-diisopropylacetimidamide (**3h**):**

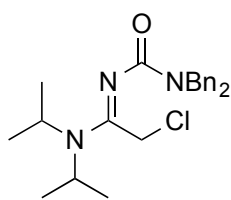

**3h** was synthesized under identical conditions as **3g** to give 297 mg of **3h** in 83% yield. <sup>1</sup>H NMR (500 MHz, Chloroform-*d*) δ 7.37-7.22 (m, 10H), 4.57 (s, 4H), 4.52 (s, 2H), 4.11-4.07 (m, 1H), 3.76-3.48 (m, 1H), 1.33-1.28 (m, 12H); <sup>13</sup>C NMR (126 MHz, Chloroform-*d*) δ 163.39, 158.27, 138.48, 138.33, 128.39, 128.35, 127.92, 127.42, 126.91, 126.88, 50.07, 48.20, 35.85, 20.57; IR = 1592, 1579, 1453, 1346, 1197, 1150, 1096, 742, 699, 613 cm<sup>-1</sup>; HRMS Exact Mass (C<sub>23</sub>H<sub>30</sub>ClN<sub>3</sub>O + H): calculated = 400.2151, measured = 400.2145.

**Procedure for the preparation of (*E*)-2-(benzylamino)-*N,N*-diisopropyl-*N'*-tosylacetimidamide (**5a**):**

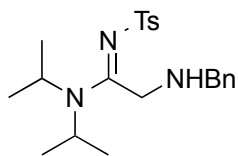

**3a** (165 mg, 0.5 mmol) was dissolved in 5 mL of a 0.5 M sodium iodide solution in acetonitrile. To this, benzyl amine (273 uL, 2.5 mmol) was added and the reaction was allowed to stir for 2 hours. The solution was removed by rotary evaporation, and the crude mixture placed onto a silica gel column. The product was purified using an automated organic purification system (Teledyne Isco, Inc.) on a normal phase column using a 0-10% gradient of methanol in dichloromethane to provide 385 mg of **5a** in 96% yield. <sup>1</sup>H NMR (400 MHz, Chloroform-*d*) δ 7.84-7.76 (m, 2H), 7.39-7.21 (m, 7H), 4.04 (sept, *J* = 6.7 Hz, 1H), 3.82 (s, 2H), 3.75 (s, 2H), 3.50 (m, 1H), 2.40 (s, 3H), 1.31 (d, *J* = 6.8 Hz, 6H), 1.11 (d, *J* = 6.6 Hz, 6H); <sup>13</sup>C NMR (101 MHz, Chloroform-*d*) δ 163.62, 141.61, 141.48, 139.28, 129.06, 128.70, 128.38, 128.26, 127.25, 126.00, 54.12, 49.99, 49.41, 47.89, 21.45, 20.31, 19.71; IR = 1524, 1447, 1370, 1267, 1134, 1082, 1051, 807, 701, 548 cm<sup>-1</sup>; HRMS Exact Mass (C<sub>22</sub>H<sub>31</sub>N<sub>3</sub>O<sub>2</sub>S<sup>+</sup> + H): calculated = 402.2210, measured = 402.2221.

**Procedure for the preparation of (*E*)-2-(benzylamino)-*N,N*-diisopropyl-*N'*-(methylsulfonyl)acetimidamide (**5b**):**

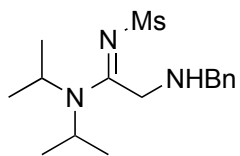

**3b** (165 mg, 1.6 mmol) was dissolved in 16 mL of a 0.5 M sodium iodide solution in acetonitrile. To this, benzyl amine (921  $\mu$ L, 8.35 mmol) was added and the reaction was allowed to stir for 2 hours. The solution was removed by rotary evaporation, and the crude mixture was placed onto a silica gel column. The product was purified using an automated purification system (Teledyne Isco, Inc.) on a normal phase column using a 0-5% gradient of methanol in dichloromethane to provide 540 mg of **5b** in 95% yield. **<sup>1</sup>H NMR** (400 MHz, Chloroform-*d*)  $\delta$  7.38-7.20 (m, 5H), 3.99 (hept, *J* = 13.2, 6.7 Hz, 1H), 3.80 (s, 2H), 3.71 (s, 2H), 3.56-3.51 (m, 1H), 3.00 (s, 2H), 1.41 (d, *J* = 6.8 Hz, 6H), 1.10 (d, *J* = 6.6 Hz, 6H); **<sup>13</sup>C NMR** (126 MHz, Chloroform-*d*)  $\delta$  163.82, 139.31, 128.65, 128.23, 127.21, 54.08, 49.78, 49.55, 47.73, 43.59, 20.33, 19.92; **IR** = 1551, 1370, 1268, 1123, 1054, 966, 811, 515  $\text{cm}^{-1}$ ; **HRMS** Exact Mass ( $\text{C}_{16}\text{H}_{27}\text{N}_3\text{O}_2\text{S} + \text{H}$ ): calculated = 326.1897, measured = 326.1907.

**Procedure for the preparation of (E)-2-(benzylamino)-N,N-diisopropyl-N'-(isopropylsulfonyl)acetimidamide (5c):**

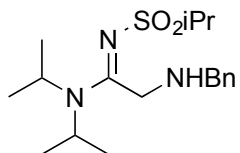

**3c** (58 mg, 0.20 mmol) was dissolved in 2 mL of a 0.5 M sodium iodide solution in acetonitrile. To this, benzyl amine (111  $\mu$ L, 1 mmol) was added and the reaction was allowed to stir for 2 hours. The solution was removed by rotary evaporation, and the crude mixture placed onto a silica gel column. The product was purified using an automated organic purification system (Teledyne Isco, Inc.) on a normal phase column using a gradient of 0-60% ethyl acetate in hexanes to provide 66 mg of **5c** in 92% yield. **<sup>1</sup>H NMR** (500 MHz, Chloroform-*d*)  $\delta$  7.37-7.21 (m, 5H), 4.01 (hept, *J* = 6.7 Hz, 1H), 3.81 (s, 2H), 3.74 (s, 2H), 3.58-3.52 (m, 1H), 3.13 (hept, *J* = 6.8 Hz, 1H), 2.53-2.49 (m, 1H), 1.41 (m, 12H), 1.10 (d, *J* = 6.6 Hz, 6H); **<sup>13</sup>C NMR** (126 MHz, Chloroform-*d*)  $\delta$  164.85, 139.28, 128.65, 128.14, 127.12, 54.37, 54.04, 49.69, 47.43, 20.28, 19.93, 16.61; **IR** = 1549, 1370, 1249, 1106, 1056, 804, 758, 704  $\text{cm}^{-1}$ ; **HRMS** Exact Mass ( $\text{C}_{18}\text{H}_{31}\text{N}_3\text{O}_2\text{S} + \text{H}$ ): calculated = 354.2210, measured = 354.2216.

**Procedure for the preparation of (E)-2-(benzylamino)-N'-((5-chlorothiophen-2-yl)sulfonyl)-N,N-diisopropylacetimidamide (5d):**

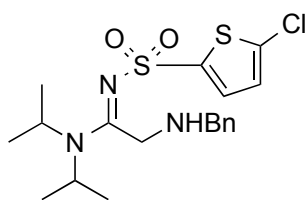

**3d** (53 mg, 0.20 mmol) was dissolved in 1.4 mL of a 0.5 M sodium iodide solution in acetonitrile. To this, benzyl amine (76  $\mu$ L, 0.7 mmol) was added and the reaction was allowed to stir for 2 hours. The solution was removed by rotary evaporation, and the crude mixture was loaded onto a silica gel column. The product was purified using an automated purification system (Teledyne Isco, Inc.) on a normal phase column using a 0-40% gradient of ethyl acetate in hexanes to provide 63 mg of **5d** in 99% yield. **<sup>1</sup>H NMR** (400 MHz, Chloroform-*d*)  $\delta$  7.31-7.15 (m, 6H), 6.77 (d, *J* = 4.0 Hz, 1H), 3.97 (sept, *J* = 6.7 Hz, 1H), 3.75 (s, 2H), 3.66 (s, 2H), 3.49 (m, 1H), 1.32 (d, *J* = 6.8 Hz, 6H), 1.05 (d, *J* = 6.6 Hz, 6H); **<sup>13</sup>C NMR** (101 MHz, Chloroform-*d*)  $\delta$  163.76, 143.89, 139.00, 135.02, 129.65, 128.71, 128.48, 128.32, 127.36, 125.80, 54.07, 50.40, 49.56, 48.27, 20.26, 19.73; **IR** = 1548, 1453, 1417, 1372, 1280, 1124, 1078, 1053, 988, 801, 626, 537  $\text{cm}^{-1}$ ; **HRMS** Exact Mass ( $\text{C}_{19}\text{H}_{26}\text{ClN}_3\text{O}_2\text{S}_2 + \text{H}$ ): calculated = 428.1228, measured = 428.1224.

**Procedure for the preparation of (*E*)-2-(benzylamino)-*N,N*-diisopropyl-*N'*-(4-nitrophenyl)acetimidamide (**5e**):**

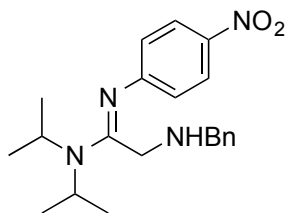

**3e** (420 mg, 1.4 mmol) was dissolved in 14 mL of a 0.5 M sodium iodide solution in acetonitrile. To this, benzyl amine (780  $\mu$ L, 7.1 mmol) was added and the reaction was allowed to stir for 2 hours. The solution was removed by rotary evaporation, and the crude mixture was redissolved in  $\sim$ 5 mL of a 1:1:0.01 water/acetonitrile/TFA solution for reverse phase purification. The product was purified using an automated purification system (Teledyne Isco, Inc.) on a reverse phase C-18 column using a 0-75% gradient of acetonitrile in water containing 0.1% TFA. The product eluted at  $\sim$ 65% acetonitrile. The fractions were combined, rotovaped, and azeotroped with ethanol and redissolved in 20 mL of dichloromethane. The dichloromethane solution was washed once with a saturated sodium carbonate solution, then dried over sodium sulfate, the solvent was removed to provide 470 mg of **5e** in 90% yield.  $^1\text{H}$  NMR (400 MHz, Chloroform-*d*)  $\delta$  8.04-7.93 (m, 2H), 7.30-7.15 (m, 3H), 7.12-7.03 (m, 2H), 6.58-6.47 (m, 2H), 4.62 (s, 2H), 4.10 (s, 2H), 3.74 (hept,  $J$  = 7.0 Hz, 2H), 1.24 (d,  $J$  = 6.8 Hz, 12H);  $^{13}\text{C}$  NMR (101 MHz, Chloroform-*d*)  $\delta$  161.38, 159.40, 153.11, 138.86, 135.40, 129.07, 127.81, 126.59, 126.04, 111.74, 54.85, 53.89, 47.69, 20.60; IR = 1659, 1593, 1495, 1307, 1112, 730, 650  $\text{cm}^{-1}$ ; HRMS Exact Mass ( $\text{C}_{21}\text{H}_{28}\text{N}_4\text{O}_2$  + H): calculated = 369.2286, measured = 369.2294.

**Procedure for the preparation of (*E*)-2-(benzylamino)-*N,N*-diisopropyl-*N'*-phenylacetimidamide hydrochloride (**5f**):**

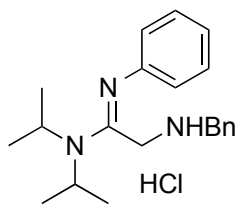

**3f** (50 mg, 0.15 mmol) was dissolved in 1.5 mL of a 0.5 M sodium iodide solution in acetonitrile. To this, benzyl amine (85  $\mu$ L, 0.77 mmol) was added and the reaction was allowed to stir for 2 hours. The solution was removed by rotary evaporation, and the residual solid was immediately resolvated in  $\sim$ 2-3 mL of dichloromethane and loaded onto a silica gel column. The crude mixture was then purified using an automated purification system (Teledyne Isco, Inc.) on a normal phase column using a 0-30% gradient of ethyl acetate in hexanes. The fractions containing product were immediately combined and 2 M HCl in ether ( $\sim$ 200  $\mu$ L, 0.30 mmol, 2 equiv.) was added causing a white precipitate to form. The residual solvent was removed to provide 65 mg of **5f** in 91% yield assuming a single HCl salt. Previous attempts to isolate and purify this compound without salting the amine lead complex decomposition before we were able to obtain characterization-quality NMR spectra.  $^1\text{H}$  NMR (500 MHz, Methanol-*d*<sub>4</sub>)  $\delta$  7.70-7.63 (m, 2H), 7.62-7.56 (m, 3H), 7.43-7.28 (m, 5H), 4.42 (s, 2H), 4.10 (s, 2H), 3.92 (s, 2H), 1.59 (s, 6H), 1.49 (s, 6H);  $^{13}\text{C}$  NMR (126 MHz, Methanol-*d*<sub>4</sub>)  $\delta$  158.02, 136.94, 136.92, 131.92, 131.89, 131.77, 131.49, 131.21, 130.42, 129.70, 57.95, 54.20, 50.82, 43.06, 20.51, 18.66; IR = 3421, 3411, 1627, 1592, 1457, 1135, 697  $\text{cm}^{-1}$ ; HRMS Exact Mass ( $\text{C}_{21}\text{H}_{29}\text{N}_3$  + H): calculated = 324.2434, measured = 324.2432.

**Procedure for the preparation of 1-benzyl-4-(diisopropylamino)-1,5-dihydro-2*H*-imidazol-2-one (**3g**):**

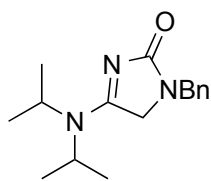

**3g** (50 mg, 0.17 mmol) was dissolved in 1.7 mL of a 0.5 M sodium iodide solution in acetonitrile. To this, benzyl amine (92  $\mu$ L, 0.85 mmol) was added and the reaction was allowed to stir for 2 hours. The solution was removed by rotary evaporation, and the crude mixture placed onto a silica gel column. The product was purified using an automated purification system (Teledyne Isco, Inc.) on a normal phase column using a 0-100% gradient of ethyl acetate in hexanes to provide 42 mg of **5g** in 92% yield. **<sup>1</sup>H NMR** (400 MHz, Chloroform-*d*)  $\delta$  7.38-7.22 (m, 5H), 4.57 (s, 2H), 3.85 (s, 2H), 3.75 (sept, *J* = 6.6 Hz, 1H), 3.46 (h, 1H), 1.49 (d, *J* = 6.9 Hz, 6H), 1.20 (d, *J* = 6.7 Hz, 6H); **<sup>13</sup>C NMR** (125 MHz Chloroform-*d*)  $\delta$  172.40, 169.38, 137.55, 128.69, 128.16, 127.48, 50.93, 50.66, 47.79, 46.55, 20.40, 19.66; **IR** = 1691, 1570, 1440, 1359 1132, 1110, 778, 704  $\text{cm}^{-1}$ ; **HRMS** Exact Mass ( $\text{C}_{16}\text{H}_{23}\text{N}_3\text{O} + \text{H}$ ): calculated = 274.1914, measured = 274.1923.

**Procedure for the preparation of (E)-2-(benzylamino)-N'-((dibenzylcarbamoyl)-N,N-diisopropylacetimidamide (**5h**):**

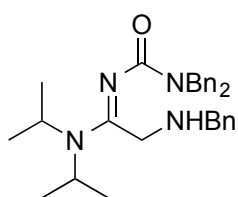

**3h** (87 mg, 0.22 mmol) was dissolved in 2.2 mL of a 0.5 M sodium iodide solution in acetonitrile. To this, benzyl amine (119  $\mu$ L, 1.1 mmol) was added and the reaction was allowed to stir for 2 hours. The solution was removed by rotary evaporation, and the crude mixture placed onto a silica gel column. The product was purified using an automated purification system (Teledyne Isco, Inc.) on a normal phase column using a 0-50% gradient of ethyl acetate in hexanes to provide 99 mg of **5h** in 97% yield. **<sup>1</sup>H NMR** (501 MHz, Chloroform-*d*)  $\delta$  7.39-7.18 (m, 14H), 4.56 (s, 2H), 4.50 (s, 2H), 3.82 (s, 1H), 3.81 (s, 1H), 3.50 (s, 1H), 3.38 (s, 2H), 1.36-1.03 (m, 12H); **<sup>13</sup>C NMR** (126 MHz, Chloroform-*d*)  $\delta$  172.42, 169.41, 164.20, 139.78, 137.57, 128.72, 128.55, 128.42, 128.32, 128.25, 128.18, 128.15, 127.51, 127.07, 54.08, 53.00, 50.96, 50.67, 47.83, 46.59, 20.42, 19.68; **IR** = 1698 1573 1442, 1360 1245, 1198, 1112, 745, 700  $\text{cm}^{-1}$ ; **HRMS** Exact Mass ( $\text{C}_{30}\text{H}_{38}\text{N}_4\text{O} + \text{H}$ ): calculated = 471.3119, measured = 471.3132.

**Procedure for the preparation of (E)-2-(cyclohexylamino)-N,N-diisopropyl-N'-tosylacetimidamide (**9a**):**

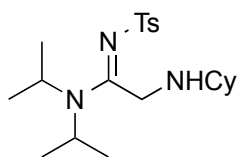

**3a** (50 mg, 0.15 mmol) was dissolved in 1.5 mL of 0.5 M sodium iodide in acetonitrile and cyclohexylamine (78  $\mu$ L, 0.76 mmol) was then added and the reaction was allowed to stir at room temperature for 2 hours. The solvent was removed by vacuum and the reaction was redissolved in ~1 mL of dichloromethane and loaded onto a silica gel loading column. The product was purified using an automated purification system (Teledyne Isco, Inc.) on a normal phase column using a 0-50% gradient of ethyl acetate in hexanes to provide 59 mg of **9a** in 98% yield. **<sup>1</sup>H NMR** (500 MHz, Chloroform-*d*)  $\delta$  7.80 (d, 2H), 7.24 (d, *J* = 8.0 Hz, 2H), 4.38 (sept, *J* = 6.6 Hz, 1H), 3.81 (s, 2H), 3.60-3.44 (m, 1H), 2.48-2.41 (m, 1H), 2.39 (s, 3H), 1.89-1.81 (m, 2H), 1.76-1.66 (m, 2H), 1.62-1.55 (m, 1H), 1.35-1.03 (m, 18H); **<sup>13</sup>C NMR** (126 MHz, Chloroform-*d*)  $\delta$  164.30, 141.61, 141.50, 129.01, 125.97, 57.24, 50.09, 48.02, 47.84, 33.02, 26.06, 24.75, 21.40, 20.42, 19.74; **IR** = 2927, 1544, 1447, 1371, 1270, 1135, 1083, 811, 548  $\text{cm}^{-1}$ ; **HRMS** Exact Mass ( $\text{C}_{21}\text{H}_{35}\text{N}_3\text{O}_2\text{S} + \text{H}$ ): calculated = 394.2523, measured = 394.2549.

**Procedure for the preparation of (*E*)-*N,N*-diisopropyl-2-(phenylamino)-*N'*-tosylacetimidamide (**9b**):**

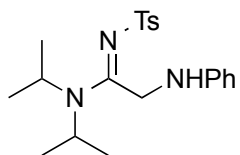

**9b** was synthesized and purified analogously to **9a** with the following changes. The reaction was heated to 80 °C in a microwave for 8 hours to provide 53 mg of **9b** in 90% yield. <sup>1</sup>H NMR (400 MHz, Chloroform-*d*) δ 7.86-7.78 (m, 2H), 7.29-7.16 (m, 4H), 6.86-6.77 (m, 1H), 6.72-6.64 (m, 2H), 4.37 (s, 2H), 4.15 (m, 1H), 3.61 (s, 1H), 2.40 (s, 3H), 1.37 (d, *J* = 6.5 Hz, 6H), 1.20 (d, *J* = 6.6 Hz, 6H); <sup>13</sup>C NMR (126 MHz, CDCl<sub>3</sub>) δ 162.69, 147.10, 141.99, 141.34, 129.44, 129.29, 126.17, 119.31, 114.24, 50.70, 48.39, 45.25, 21.58, 20.69, 19.88; IR = 1603, 1548, 1372 1269, 1137, 1083, 1051, 548 cm<sup>-1</sup>; HRMS Exact Mass (C<sub>21</sub>H<sub>30</sub>N<sub>3</sub>O<sub>2</sub>S + H): calculated = 388.2054, measured = 388.2044.

**Procedure for the preparation of (*E*)-2-(diethylamino)-*N,N*-diisopropyl-*N'*-tosylacetimidamide (**9c**):**

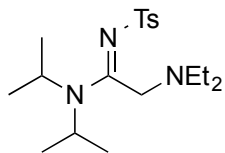

**9c** was synthesized and purified analogously to **9a** to provide 51 mg of **9c** in 92% yield. <sup>1</sup>H NMR (500 MHz, Chloroform-*d*) δ 7.79 (d, *J* = 8.1 Hz, 2H), 7.22 (d, *J* = 7.9 Hz, 2H), 4.64 (sept, *J* = 6.7 Hz, 1H), 3.83 (s, 2H), 3.46 (sept, *J* = 6.8 Hz, 1H), 2.58 (q, *J* = 7.1 Hz, 4H), 2.38 (s, 3H), 1.29 (d, *J* = 6.9 Hz, 3H), 1.17 (d, *J* = 6.6 Hz, 6H), 1.03 (t, *J* = 7.1 Hz, 6H); <sup>13</sup>C NMR (126 MHz, Chloroform-*d*) δ 163.68, 141.95, 141.29, 128.89, 125.96, 55.20, 50.43, 47.83, 46.82, 21.37, 20.29, 19.65, 19.14, 11.97; IR = 1546, 1369, 1267. 1132, 1080, 1050, 811, 728, 548 cm<sup>-1</sup>; HRMS Exact Mass (C<sub>19</sub>H<sub>33</sub>N<sub>3</sub>O<sub>2</sub>S + H): calculated = 368.2368, measured = 368.2379.

**Procedure for the preparation of (*E*)-*N,N*-diisopropyl-2-(pyrrolidin-1-yl)-*N'*-tosylacetimidamide (**9d**):**

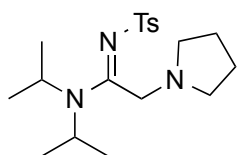

**9d** was synthesized and purified analogously to **9a** to provide 51 mg of **9d** a 92% yield. <sup>1</sup>H NMR (500 MHz, Chloroform-*d*) δ 7.79 (d, *J* = 7.9 Hz, 2H), 7.22 (d, *J* = 7.9 Hz, 2H), 4.52 (hept, *J* = 6.6 Hz, 1H), 3.91 (s, 2H), 3.47 (sept, *J* = 6.8 Hz, 1H), 2.67-2.58 (m, 4H), 2.37 (s, 3H), 1.72 (q, *J* = 3.2 Hz, 4H), 1.29 (d, *J* = 6.8 Hz, 6H), 1.16 (d, *J* = 6.6 Hz, 6H); <sup>13</sup>C NMR (126 MHz, Chloroform-*d*) δ 162.94, 141.97, 141.26, 128.88, 125.95, 55.26, 52.73, 50.91, 47.84, 23.73, 21.36, 20.37, 19.68; IR = 1545, 1372, 1273, 1138, 1985, 1051, 810, 666, 549 cm<sup>-1</sup>; HRMS Exact Mass (C<sub>19</sub>H<sub>31</sub>N<sub>3</sub>O<sub>2</sub>S + H): calculated = 366.2210, measured = 366.2236.

**Procedure for the preparation of (*E*)-2-(benzhydrylamino)-*N,N*-diisopropyl-*N'*-tosylacetimidamide (**9e**):**

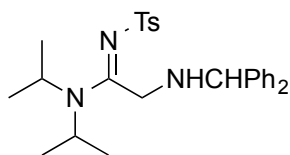

**9e** was synthesized and purified analogously to **9a** to provide 65 mg of **9e** in 72% yield. <sup>1</sup>H NMR (400 MHz, Chloroform-*d*) δ 7.83-7.75 (m, 2H), 7.45-7.36 (m, 4H), 7.36-7.18 (m, 8H), 4.83 (s, 1H), 4.04 (sept, *J* = 6.7 Hz, 1H), 3.68 (s, 2H), 3.56-3.44 (m, 1H), 2.63 (s, 1H), 2.34 (s, 3H), 1.33 (d, *J* = 6.8 Hz, 6H), 1.12 (d, *J* = 6.6 Hz, 6H); <sup>13</sup>C NMR (101 MHz,

CDCl<sub>3</sub>)  $\delta$  163.44, 142.67, 141.61, 141.37, 128.99, 128.39, 128.37, 128.26, 127.50, 127.45, 127.31, 125.94, 67.95, 49.97, 49.03, 47.90, 21.34, 20.20, 19.66; **IR** = 1547, 1493, 1270, 1138, 1084, 705, 548 cm<sup>-1</sup>; **HRMS** Exact Mass (C<sub>28</sub>H<sub>35</sub>N<sub>3</sub>O<sub>2</sub>S + H): calculated = 478.2523, measured = 478.2523.

**Procedure for the preparation of (*E*)-*N*-benzyl-2-chloro-*N*-((*E*)-2-(diisopropylamino)-2-((methylsulfonyl)imino)ethyl)-*N'*-(methylsulfonyl)acetimidamide (**10**):**

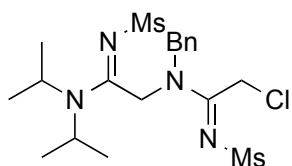

**5b** (425 mg 1.3 mmol) was dissolved in 13 mL of DCM containing *N*-methylmorpholine (428  $\mu$ L, 3.9 mmol) followed by the addition of **2b** (370 mg, 1.95 mmol). The reaction was allowed to stir for 3 hours, then the solvent was removed by rotary evaporation. The crude material was loaded onto silica gel with  $\sim$ 1 mL of dichloromethane and was purified using an automated purification system (Teledyne Isco, Inc.) on a normal phase column using a 0-40% gradient of ethyl acetate in dichloromethane to provide 592 mg of **10** in 95% yield. **<sup>1</sup>H NMR** (400 MHz, Chloroform-*d*)  $\delta$  7.44-7.24 (m, 3H), 7.23-7.15 (m, 2H), 4.95 (s, 2H), 4.77 (s, 2H), 4.60 (s, 2H), 4.02-3.90 (m, 1H), 3.64-3.59 (m, 1H), 3.07-2.97 (m, 3H), 2.94 (s, 3H), 1.40 (s, 6H), 1.23-1.10 (m, 6H); **<sup>13</sup>C NMR** (101 MHz, Chloroform-*d*)  $\delta$  162.87, 159.16, 134.87, 129.13, 128.96, 128.43, 128.21, 126.45, 53.61, 51.69, 50.70, 48.46, 43.76, 43.35, 43.12, 34.40, 20.65, 20.40, 19.88, 19.76; **IR** = 1550, 1451, 1359, 1110, 956, 849, 779, 731, 698, 558, 516 cm<sup>-1</sup>; **HRMS** Exact Mass (C<sub>19</sub>H<sub>31</sub>ClN<sub>4</sub>O<sub>4</sub>S<sub>2</sub> + H): calculated = 479.1548, measured = 479.1550.

**Procedure for the preparation of (*E*)-*N*-benzyl-2-(benzylamino)-*N*-((*E*)-2-(diisopropylamino)-2-((methylsulfonyl)imino)ethyl)-*N'*-(methylsulfonyl)acetimidamide (**11**):**

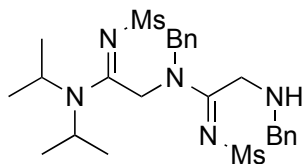

**10** (400 mg, 0.835 mmol) was added to a 0.5 M solution of sodium iodide in acetonitrile (8.4 mL, 4.2 mmol NaI) followed by the addition of benzyl amine (460  $\mu$ L, 4.175 mmol). The reaction was allowed to stir for 3 hours and the solvent was removed under vacuum. The crude material was loaded onto silica gel with dichloromethane and was purified using an automated purification system (Teledyne Isco, Inc.) on a normal phase column using a 0-5% gradient of methanol in dichloromethane to provide 457 mg of **11** in 99% yield. **<sup>1</sup>H NMR** (500 MHz, Chloroform-*d*)  $\delta$  7.39-7.21 (m, 8H), 7.03 (d, *J* = 7.3 Hz, 2H), 4.86-4.71 (m, 4H), 4.08-4.01 (m, 1H), 3.77 (s, 2H), 3.73 (s, 2H), 3.64 (s, 1H), 3.05 (s, 3H), 2.96 (s, 3H), 1.49-1.37 (m, 6H), 1.26 – 1.17 (m, 6H); **<sup>13</sup>C NMR** (126 MHz, Chloroform-*d*)  $\delta$  167.59, 159.85, 139.03, 135.60, 128.76, 128.41, 128.29, 127.69, 127.18, 126.54, 54.19, 51.64, 50.63, 48.54, 48.36, 47.20, 43.76, 43.19, 43.04, 29.57, 20.52, 19.90; **IR** = 1554, 1272, 1115, 964, 819, 781, 734, 700, 518 cm<sup>-1</sup>; **HRMS** Exact Mass (C<sub>26</sub>H<sub>39</sub>N<sub>5</sub>O<sub>4</sub>S<sub>2</sub> + H): calculated = 550.2516, measured = 550.2532.

**Procedure for the preparation of (*E*)-*N*-benzyl-*N*-((*E*)-2-(benzyl((*E*)-2-(diisopropylamino)-2-((methylsulfonyl)imino)ethyl)amino)-2-((methylsulfonyl)imino)ethyl)-2-chloro-*N'*-(methylsulfonyl)acetimidamide (**12**):**

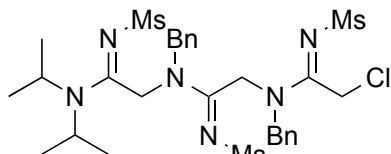

**11** (250 mg, 0.455 mmol) was dissolved in 4.5 mL of DCM containing N-methylmorpholine (150  $\mu$ L, 1.36 mmol) followed by the addition of **2b** (130 mg, 0.682 mmol). The reaction was allowed to stir for 3 hours, then the solvent was removed by rotary evaporation. The crude material was loaded onto silica

gel with dichloromethane and was purified using an automated purification system (Teledyne Isco, Inc.) on a normal phase column using a 0-10% gradient of methanol in dichloromethane to provide 280 mg of **12** in 90% yield.  $^1\text{H}$  NMR (500 MHz, Chloroform-*d*)  $\delta$  7.40-7.12 (m, 10H), 5.12-4.77 (m, 6H), 4.76-4.46 (m, 4H), 3.86-3.70 (m, 1H), 3.57-3.43 (m, 1H), 3.13-2.80 (m, 9H), 1.30-1.22 (m, 6H), 1.04-0.93 (m, 6H);  $^{13}\text{C}$  NMR (126 MHz, Chloroform-*d*)  $\delta$  164.14, 162.99, 162.74, 159.13, 135.27, 135.04, 134.73, 129.57, 129.13, 128.67, 128.47, 128.22, 127.98, 127.61, 126.74, 126.36, 52.95, 52.57, 49.07, 48.60, 48.20, 43.90, 43.85, 43.09, 43.03, 35.46, 34.61, 20.45, 19.85; IR = 1556, 1276, 1118, 966, 780, 563, 519  $\text{cm}^{-1}$ ; HRMS Exact Mass ( $\text{C}_{29}\text{H}_{43}\text{ClN}_6\text{O}_6\text{S}_3 + \text{H}$ ): calculated = 703.2167, measured = 703.2155.

**Procedure for the preparation of (E)-2-(benzyl((E)-1,4-dibenzyl-5-((methylsulfonyl)imino)-1,4,5,6-tetrahydropyrazin-2-yl)amino)-N,N-diisopropyl-N'-(methylsulfonyl)acetimidamide (13):**

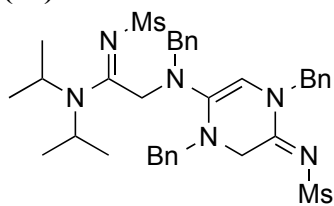

**12** (30 mg, 0.043 mmol) was added to was added to a 0.5 M solution of sodium iodide in acetonitrile (0.860 mL, 0.415 mmol NaI) followed by the addition of benzylamine (26.8  $\mu$ L, 0.215 mmol). The reaction was heated slightly with a heat gun to allow the material to dissolve and was allowed to stir. After 1 hour TLC showed consumption of starting material and the solvent was

removed under vacuum. The crude material was loaded onto silica gel with dichloromethane and was purified using an automated organic purification system (Teledyne Isco, Inc.) on a normal phase column using a 0-30% gradient of ethyl acetate in dichloromethane to provide 23 mg of **12** in 79% yield. The compound was immediately characterized, as it is prone to decomposition.  $^1\text{H}$  NMR (500 MHz, Acetonitrile-*d*<sub>3</sub>)  $\delta$  7.42-7.22 (m, 9H), 7.22-7.08 (m, 5H), 7.02-6.97 (m, 2H), 5.55 (s, 1H), 4.56 (s, 2H), 4.52 (s, 2H), 4.30 (s, 2H), 4.09-3.97 (m, 5H), 3.66 (hept,  $J$  = 6.6 Hz, 1H), 2.92 (s, 3H), 2.46 (s, 3H), 1.42 (d,  $J$  = 6.7 Hz, 6H), 1.07 (d,  $J$  = 6.6 Hz, 6H);  $^{13}\text{C}$  NMR (126 MHz, Acetonitrile-*d*<sub>3</sub>)  $\delta$  162.47, 155.69, 142.73, 139.16, 139.14, 137.45, 130.15, 129.92, 129.87, 129.82, 129.80, 129.76, 129.65, 129.59, 129.07, 128.90, 128.77, 128.66, 118.69, 118.46, 101.77, 55.71, 54.21, 53.79, 53.28, 52.30, 51.77, 49.18, 48.32, 44.84, 43.94, 43.44, 21.31, 20.67; IR = 1548, 1453, 1265, 1109, 964, 817, 734, 700, 517  $\text{cm}^{-1}$ ; HRMS Exact Mass ( $\text{C}_{35}\text{H}_{46}\text{N}_6\text{O}_4\text{S}_2 + \text{H}$ ): calculated = 679.3114, measured = 679.3095.

**Procedure for the preparation of (E)-N-benzyl-N-((E)-2-(benzyl((E)-2-(diisopropylamino)-2-((methylsulfonyl)imino)ethyl)amino)-2-((methylsulfonyl)imino)ethyl)-N'-(methylsulfonyl)-2-(((S)-1-phenylethyl)amino)acetimidamide (14):**

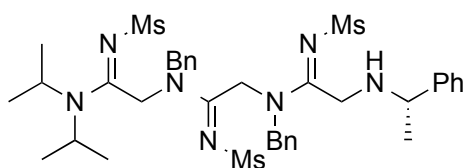

**12** (69.6 mg, 0.1 mmol) was dissolved in acetonitrile followed by the addition of (S)-Methylbenzylamine (62  $\mu$ L, 0.5 mmol). The reaction was heated to 80° C for 1 h in the microwave. The crude material was loaded onto silica gel with dichloromethane and was purified using an

automated purification system (Teledyne Isco, Inc.) on a normal phase column using a 0-10% gradient of methanol in dichloromethane to provide 78 mg of **14** in 99% yield. **<sup>1</sup>H NMR** (400 MHz, Chloroform-*d*)  $\delta$  7.56-6.67 (m, 15H), 5.13-4.56 (m, 8H), 4.0-3.57 (m, 4H), 3.53-3.17 (m, 1H), 3.10-2.71 (m, 10H), 1.74-0.70 (m, 15H). **<sup>13</sup>C NMR** (101 MHz Chloroform-*d*)  $\delta$  163.58, 159.46, 159.20, 144.13, 143.66, 143.12, 135.48, 129.05, 128.98, 128.91, 128.87, 128.76, 128.64, 128.43, 128.23, 127.93, 127.81, 127.74, 127.30, 126.92, 126.79, 126.54, 125.90, 109.98, 59.10, 56.10, 53.76, 52.79, 51.21, 50.77, 48.65, 47.86, 46.51, 43.97, 43.83, 43.10, 42.41, 29.68, 23.76, 20.55, 19.87, 14.10; **IR** = 1550, 1452, 1274, 1114, 965, 855, 778, 733, 700, 558, 517  $\text{cm}^{-1}$ ; **HRMS** Mass ( $\text{C}_{37}\text{H}_{53}\text{N}_7\text{O}_6\text{S}_3 + \text{H}$ ): calculated = 788.3292, measured = 788.3275;  $[\alpha]_{\text{D}}^{25} = -9.0^\circ$  (c 0.01,  $\text{CH}_2\text{Cl}_2$ ).

**Procedure for the preparation of (*E*)-*N*-benzyl-*N*-((*E*)-2-(benzyl((*E*)-2-(diisopropylamino)-2-((methylsulfonyl)imino)ethyl)amino)-2-((methylsulfonyl)imino)ethyl)-2-(dibenzylamino)-*N'*-(methylsulfonyl)acetimidamide (**15**):**

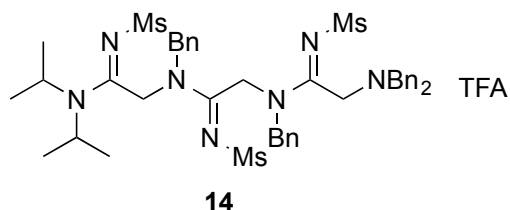

**12** (50 mg 0.071 mmol) was dissolved in acetonitrile and dibenzylamine was added (68  $\mu\text{L}$ , 0.355 mmol), the reaction was then placed in a microwave at  $80^\circ\text{C}$  for 16 hours. The crude reaction was directly loaded onto a C18 pre-packed loading column and used with an automated purification system (Teledyne Isco, Inc.)

on a C18 reverse phase column using a 0-100% gradient of acetonitrile in water with a 0.1% TFA buffer. The fractions were combined and the solvent was then doubly azeotroped with anhydrous ethanol and dried on high vacuum to provide 69.5 mg of **15** in 99% yield assuming a single TFA salt. **<sup>1</sup>H NMR** (400 MHz, Chloroform-*d*)  $\delta$  7.62-6.69 (m, 19H), 5.31-4.94 (m, 3H), 4.92-4.53 (m, 4H), 4.44 (s, 1H), 4.20 (s, 1H), 3.99 (s, 1H), 3.82 (s, 3H), 3.69-3.38 (m, 2H), 3.21-2.60 (m, 9H), 1.54-0.71 (m, 12H); **<sup>13</sup>C NMR** (101 MHz, Chloroform-*d*)  $\delta$  162.85, 161.21, 160.44, 160.07, 158.74, 135.02, 134.60, 130.28, 130.01, 129.73, 129.63, 129.41, 129.21, 128.99, 128.76, 128.51, 128.24, 128.10, 127.91, 126.28, 125.78, 117.00, 114.14, 109.95, 58.76, 58.10, 54.77, 52.92, 52.53, 52.48, 51.49, 49.27, 48.56, 44.16, 43.86, 43.62, 43.18, 42.85, 20.30, 19.70; **IR** 1556, 1279 1189, 968 728, 700, 562, 519  $\text{cm}^{-1}$ ; **HRMS** Exact Mass ( $\text{C}_{43}\text{H}_{57}\text{N}_7\text{O}_6\text{S}_3 + \text{H}$ ): calculated = 864.3605, measured = 864.3620

**Procedure for the preparation of (*E*)-*N*-benzyl-*N*-((*E*)-2-(benzyl((*E*)-2-(diisopropylamino)-2-((methylsulfonyl)imino)ethyl)amino)-2-((methylsulfonyl)imino)ethyl)-2-((*E*)-2-chloro-*N'*-(methylsulfonyl)-*N*-((*S*)-1-phenylethyl)acetimidamido)-*N'*-(methylsulfonyl)acetimidamide (**16**):**

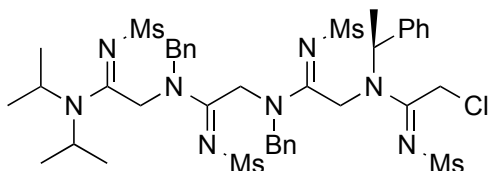

**13** (15.5 mg, 0.0197 mmol) was dissolved in 400  $\mu\text{L}$  of acetonitrile and *N*-Methylmorpholine (6.5  $\mu\text{L}$ , 0.0591  $\mu\text{L}$ ) was added followed by the addition of **3b** (5.6 mg, 0.0296 mmol). The reaction was heated to  $60^\circ\text{C}$  in the microwave for 90 minutes resulting in a

dark black solution. The crude reaction was poured into a separatory funnel containing 10 mL of DCM and was washed with saturated  $\text{NaHCO}_3$  (10 mL), saturated  $\text{NH}_4\text{Cl}$  (10 mL), and brine (10 mL). The organic layer was then dried over sodium sulfate and removed by rotary evaporation.

The crude material was loaded onto silica gel with dichloromethane and was purified using an automated purification system (Teledyne Isco, Inc.) on a normal phase column using a 0-100% gradient ethyl acetate in hexane to provide 15.3 mg of **16** in 83% yield. **<sup>1</sup>H NMR** (800 MHz, Chloroform-*d*)  $\delta$  7.53-6.82 (m, 13H), 6.82-6.42 (m, 2H), 5.79 (s, 2H), 5.61-5.01 (m, 2H), 5.02-3.96 (m, 6H), 3.96-3.31 (m, 3H), 3.29-2.61 (m, 12H), 1.77 (d, *J* = 6.9 Hz, 2H), 1.52-0.76 (m, 15H); **<sup>13</sup>C NMR** (200 MHz, Chloroform-*d*)  $\delta$  165.45, 163.06, 162.79, 159.03, 138.69, 134.96, 134.58, 129.19, 129.10, 128.57, 128.26, 127.88, 127.53, 127.12, 126.99, 126.78, 126.12, 125.40, 57.33, 54.22, 53.68, 52.08, 51.00, 50.04, 48.67, 47.53, 45.74, 44.39, 44.25, 44.06, 44.02, 43.86, 43.61, 43.26, 43.21, 36.50, 35.43, 29.68, 29.34, 20.66, 20.45, 20.05, 19.70, 19.51, 14.35; **IR** = 1558, 1444, 1275, 1116, 965, 780, 733, 699, 524 cm<sup>-1</sup>; **HRMS** Exact Mass (C<sub>40</sub>H<sub>57</sub>ClN<sub>8</sub>O<sub>8</sub>S<sub>4</sub> + H): calculated = 941.2943, measured = 941.2954; [ $\alpha$ ]<sub>D</sub><sup>25</sup> = -50.0° (c 0.01, CH<sub>2</sub>Cl<sub>2</sub>).

**Procedure for the preparation of 2-chloro-*N,N*-diethyl-*N'*-phenethylacetimidamide (**37**):**

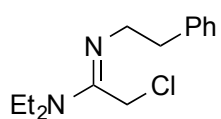

**8i** (197 mg, 1 mmol) was dissolved in toluene (4 mL) and PCl<sub>5</sub> (228 mg, 1.1 mmol) was added. The reaction was allowed to stir at room temperature overnight (14h). The reaction was then cooled in an ice bath to 0° C followed by the drop-wise addition of diethylamine (1.05 mL, 10 mmol). The reaction was kept at 0° C for 2 h and then the solvent was removed by rotary evaporation and the residual material was directly loaded onto a silica gel column and purified using an automated purification system (Teledyne Isco, Inc.) on a normal phase column using a from 0-15% methanol in dichloromethane resulting in a very broad peak that, after removal of solvent, provide 284 mg of a mixture containing **35**. NMR integration showed a mixture of 0.68 equivalents of diethylamine, and 1.0 equivalent of **35** as an HCl salt and 0.29 equivalents of DCM. Analysis of the integration reveals this mixture contains 197 mg of **37** a 78% NMR-yield. This mixture was then characterized **<sup>1</sup>H NMR** (400 MHz, Chloroform-*d*)  $\delta$  10.85 (s, 1H), 9.68 (s, 0.4H), 7.34-7.16 (m, 5H), 3.92 (q, *J* = 7.1 Hz, 2H), 3.78 (q, *J* = 6.5 Hz, 2H), 3.56 (s, 2H), 3.41 (q, *J* = 7.2 Hz, 2H), 3.15 (t, *J* = 6.7 Hz, 2H), 1.30 (t, *J* = 7.1 Hz, 3H), 1.23 (t, 3H); **<sup>13</sup>C NMR** (126 MHz, CDCl<sub>3</sub>)  $\delta$  159.02, 137.89, 129.46, 129.10, 127.24, 46.88, 46.52, 45.86, 42.42, 36.33, 32.80, 14.31, 11.60, 11.37; **IR** = 1636, 1497, 1454, 1387, 1355, 1193, 1079, 752, 704 cm<sup>-1</sup>; **HRMS** Exact Mass (C<sub>14</sub>H<sub>21</sub>ClN<sub>2</sub> + H<sup>+</sup>): calculated = 253.1466, measured = 253.1412.

## 6. Solid-Phase Procedures:

### Reagents:

All solvent and reagents were used as purchased. DMF/DCM were used from anhydrous bottles. Amines were used as purchased. Rink Amide Resin was purchased from Peptides international (0.61 or 0.51 mmol/g loading). All reactions were carried out in either glass or plastic tubes and were rotated under normal atmosphere. NMP and NMM were purchased as >99% purity and were stored in a dry-box over CaSO<sub>4</sub> after opening.

### Washing:

Upon completion, reactions were washed 2x DCM, then alternating (DCM/DMF) 3x then DCM 2x using ~2-3 mL of solvent per 100 mg of resin. After this, the resin was then blown with dry nitrogen and placed under high vacuum until dry.

### Cyclohexyl/Tetrahydropyranyl Resin:

This resin was prepared on large scale (4 g) using previously published methods<sup>4</sup> and was stored in the -20 °C freezer. Yields for all solid phase syntheses were calculated assuming full conversion of the Resin-NH-Fmoc to the Resin-NH-Cyclohexyl. Reductive amination with Tetrahydro-4H-pyran-4-one was carried out under analogous procedure to that of cyclohexanone. Resin loading levels were adjusted (0.61 mmol to 0.63 mmol/g and 0.51 mmol/g to 0.52 mmol/g) due to the change in mass of the resin functionality. The equation used to calculate such changes is found in the supplementary information of this reference<sup>5</sup>.

### Amidintion:

To 200 mg of resin (0.12 mmol) was added 3 mL of NMP, 200 uL of NMM (~2.15 mmol, 17.6 equiv), followed 800 uL of 1 M imidoyl chloride stock solution in DCM (0.8 mmol, 6.5 equiv) or in the case of the imidoyl chloride **2b** 152 mg of solid (0.8 mmol, 6.5 equiv). The reaction was immediately agitated to ensure even mixing and was placed on a rotator for 12-14 hours under ambient atmosphere. It was observed that the reaction mixture turns dark black and warms over the course of several minutes after the addition of the imidoyl chloride.

### Amination:

To 200 mg of resin 4 mL of 1 M amine in dry DMF was added. The reaction was immediately agitated and allowed to rotate for 12 hours under ambient atmosphere.

### Cleavage:

Unless stated otherwise, all peptides were cleaved with 3 mL/100 mg of resin of a 1:19 TFA:DCM solution unless otherwise noted for 1 hour in a glass tube (to prevent leaching of plastic contaminants). The resin was then washed with an extra 3 mL/100 mg resin of cleavage cocktail and then methanol. 10 uL of this crude mixture was dissolved in 500 uL of CH<sub>3</sub>CN and injected for crude LCMS analysis of cleavage products.

### Purification:

All crude reaction cleavage solutions were removed by rotary evaporation. Normal or reverse phase chromatography was used for purification. Reverse phase was carried out with Water/Acetonitrile buffered with either 0.1% TFA or FA see individual compound preparation.

**Procedure for the preparation of (*E*)-2-(benzylamino)-*N*-cyclohexyl-*N'*-tosylacetimidamide (**22**):**

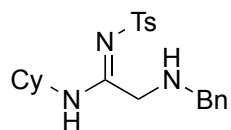

200 mg of cyclohexyl resin with a loading of 0.62 mmol/g was treated under the standard solid phase synthesis procedure. The crude cleavage solution was poured into a separatory funnel containing 10 mL of DCM and was washed with 1 M NaOH (10 mL). The organic layer was dried over sodium sulfate and the crude material was loaded onto silica gel and was purified using an automated purification system (Teledyne Isco, Inc.) on a normal phase column using a 0-60% gradient of ethyl acetate in hexanes to provide 34.7 mg of **22** in 70% yield. <sup>1</sup>H NMR (400 MHz, Chloroform-*d*) δ 7.84 (s, 1H), 7.76 (d, *J* = 7.9 Hz, 2H), 7.34-7.14 (m, 7H), 3.95 (s, 2H), 3.86-3.72 (m, 1H), 3.68 (s, 2H), 2.37 (s, 3H), 1.86-1.49 (m, 5H), 1.40-1.05 (m, 5H); <sup>13</sup>C NMR (101 MHz, Chloroform-*d*) δ 163.48, 163.13, 156.85, 143.14, 138.94, 130.10, 130.02, 129.99, 129.84, 129.60, 129.49, 129.44, 129.33, 126.42, 126.18, 52.93, 51.50, 48.19, 30.91, 25.12, 24.27, 21.51; IR = 1564, 1452, 1274, 1141, 1085, 814, 748, 698, 669, 616, 555 cm<sup>-1</sup>; HRMS Exact Mass (C<sub>22</sub>H<sub>29</sub>N<sub>3</sub>O<sub>2</sub>S + H): calculated = 400.2053, measured = 400.2042.

**Procedure for the preparation of (*E*)-*N*-benzyl-*N*-((*E*)-2-(cyclohexylamino)-2-(tosylimino)ethyl)-2-(dibenzylamino)-*N'*-tosylacetimidamide (**23**):**

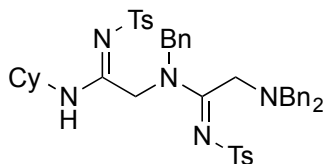

200 mg of cyclohexyl resin with a loading of 0.62 mmol/g was treated under the standard solid phase synthesis procedure except for the last amination procedure. The final amination procedure used 1M dibenzylamine in DMF containing 0.5 M KI. The resin was then cleaved using the standard procedure and the crude cleavage solution was removed by rotary evaporation. The crude material was redissolved in several milliliters of 1:1:0.01 CH<sub>3</sub>CN:H<sub>2</sub>O:TFA and purified using an automated purification system (Teledyne Isco, Inc.) on a C18 reverse phase column using a gradient of 30-100% acetonitrile in water buffered with 0.1% TFA. The fractions were combined and the crude material was doubly azeotroped with anhydrous ethanol and dried on high vacuum to provide 67 mg of **23** in 60% yield assuming a single TFA salt. <sup>1</sup>H NMR (400 MHz, Chloroform-*d*) δ 8.35-6.21 (m, 23H), 5.21-2.85 (m, 10H), 2.52-2.20 (m, 6H), 2.17-0.40 (m, 10H); <sup>13</sup>C NMR (101 MHz Chloroform-*d*) δ 166.33, 164.06, 160.44, 142.85, 142.69, 142.00, 140.56, 140.04, 139.91, 137.46, 135.19, 134.66, 129.52, 129.48, 129.36, 129.34, 129.31, 129.24, 129.18, 129.14, 129.07, 129.03, 128.96, 128.64, 128.60, 128.50, 128.34, 128.21, 127.76, 127.50, 126.67, 126.40, 126.10, 126.07, 59.35, 59.17, 58.55, 54.88, 54.13, 53.26, 52.69, 51.84, 50.50, 48.01, 33.15, 32.87, 31.23, 30.93, 29.73, 29.70, 25.25, 25.05, 24.75, 24.43, 24.03, 23.83, 22.68, 21.53, 21.50, 21.46, 21.42; IR 1545, 1452, 1278, 1144, 1087, 814, 750, 696, 578 cm<sup>-1</sup>; HRMS Exact Mass (C<sub>45</sub>H<sub>51</sub>N<sub>5</sub>O<sub>4</sub>S<sub>2</sub> + H): calculated = 790.3455, measured = 790.3459.

**Procedure for the preparation of (*E*)-*N*-benzyl-*N*-((*E*)-2-(benzyl((*E*)-2-(cyclohexylamino)-2-(tosylimino)ethyl)amino)-2-(tosylimino)ethyl)-2-chloro-*N'*-tosylacetimidamide (**24**):**

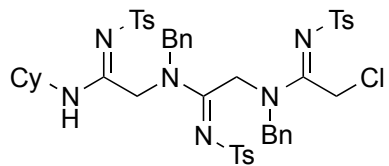

200 mg of cyclohexyl resin with a loading of 0.51 mmol/g was treated under the standard solid phase synthesis procedure. After cleavage the solvent was removed by rotary evaporation and the residual compound was dried under high vacuum. The crude material was loaded onto silica gel and was purified using an automated purification system (Teledyne Isco, Inc.) on a normal phase column using a 0-70% gradient of ethyl acetate in hexanes to provide 43.7 mg of **24** in 45% yield. <sup>1</sup>H NMR (400 MHz, Chloroform-*d*) δ 8.13-7.53 (m, 6H), 7.40-6.84 (m, 14H), 5.45-3.77 (m, 9H), 3.64-3.41 (m, 1H), 3.07-2.85 (m, 1H), 2.47-2.28 (m, 9H), 1.71-0.83 (m, 10H); <sup>13</sup>C NMR (101 MHz, Chloroform-*d*) δ 171.06, 164.60, 163.37, 163.21, 162.60, 162.44, 161.27, 160.35, 160.27, 143.48, 143.03, 142.93, 142.72, 142.52, 142.37, 142.08, 140.11, 139.98, 139.35, 139.11, 135.36, 134.88, 134.11, 134.08, 133.88, 132.92, 129.61, 129.59, 129.44, 129.38, 129.23, 129.13, 129.10, 129.05, 129.03, 128.97, 128.66, 128.38, 128.31, 127.98, 127.88, 126.88, 126.46, 126.14, 126.10, 126.05, 125.82, 60.32, 55.08, 54.59, 54.03, 53.85, 51.97, 50.70, 49.24, 48.75, 48.17, 47.54, 46.36, 45.10, 35.81, 34.58, 34.22, 34.01, 33.76, 33.14, 32.85, 31.86, 31.58, 30.93, 30.30, 29.70, 29.63, 29.59, 29.55, 29.29, 29.25, 29.19, 28.88, 25.03, 24.74, 24.57, 23.90, 23.78, 22.62, 21.56, 21.49, 21.47, 21.43, 21.42, 21.40, 20.99, 14.15, 14.07; IR 1555, 1452, 1283, 1144, 1088, 762, 686, 578 cm<sup>-1</sup>; HRMS Exact Mass (C<sub>47</sub>H<sub>53</sub>ClN<sub>6</sub>O<sub>6</sub>S<sub>3</sub> + H): calculated = 929.2950, measured = 929.2979.

**Procedure for the preparation of (*E*)-*N*-benzyl-*N*-((*E*)-2-(benzyl((*E*)-2-(cyclohexylamino)-2-(tosylimino)ethyl)amino)-2-(tosylimino)ethyl)-2-(dibenzylamino)-*N'*-tosylacetimidamide (**25**):**

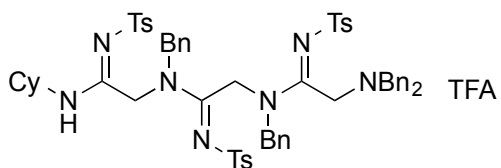

200 mg of cyclohexyl resin with a loading of 0.51 mmol/g was treated under the standard solid phase synthesis procedure. After cleavage the solvent was removed by rotary evaporation and the residual compound was dried under high vacuum. The crude material was loaded onto an automated purification system (Teledyne Isco, Inc.) on a C18 reverse phase column using a 0-100% gradient of acetonitrile in water buffered with 0.1% TFA. The fractions were combined and the crude material was doubly azeotroped with anhydrous ethanol and dried on high vacuum to provide 46.6 mg of **25** in 38% yield assuming a single TFA salt. <sup>1</sup>H NMR (400 MHz, Chloroform-*d*) δ 8.12-6.51 (m, 32H), 5.38-5.03 (m, 2H), 4.7-4.10 (m, 5H), 4.06-3.39 (m, 5H), 3.34-3.23 (m, 1H), 2.58-2.26 (m, 9H), 1.63-0.83 (m, 8H), 0.66-0.49 (m, 2H); <sup>13</sup>C NMR (101 MHz, Chloroform-*d*) δ 166.33, 164.06, 160.44, 142.85, 142.69, 142.00, 140.56, 140.04, 139.91, 137.46, 135.19, 134.66, 129.63, 129.52, 129.48, 129.36, 129.34, 129.31, 129.24, 129.18, 129.14, 129.07, 129.03, 128.97, 128.87, 128.64, 128.60, 128.50, 128.34, 128.21, 127.91, 127.76, 127.50, 126.67, 126.40, 126.29, 126.07, 59.35, 59.17, 58.55, 54.88, 54.13, 53.26, 52.69, 51.84, 50.50, 48.01, 33.15, 32.87, 31.23, 30.93, 29.73, 29.70, 25.25, 25.05, 24.75, 24.43, 24.03, 23.83, 22.68, 21.53, 21.50, 21.46, 21.42; IR = 1545, 1452, 1282, 1146, 1088, 697, 578 cm<sup>-1</sup>; HRMS Exact Mass (C<sub>61</sub>H<sub>67</sub>N<sub>7</sub>O<sub>6</sub>S<sub>3</sub> + H): calculated = 1090.4388, measured = 1090.4392

**Procedure for the preparation of (*E*)-*N*-benzyl-*N*-((*E*)-2-(benzyl((*E*)-2-(cyclohexylamino)-2-(tosylimino)ethyl)amino)-2-(tosylimino)ethyl)-2-((*E*)-2-chloro-*N*-((*S*)-1-phenylethyl)-*N'*-tosylacetimidamido)-*N'*-tosylacetimidamide (**26**):**

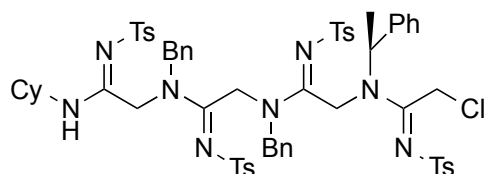

200 mg of cyclohexyl resin with a loading of 0.51 mmol/g was treated under the standard solid phase synthesis procedure. The last amidination coupling was carried out in triplicate each time for 1 hour at 60° C in the microwave achieving ~80% overall conversion to the product by LCMS analysis of the cleavage.

The crude cleavage solution was removed by rotary evaporation and the residual compound was then dissolved in 10 mL of DCM and washed with saturated sodium bicarbonate and the residual organic layer was then dried over sodium sulfate. The crude material was loaded onto silica gel and was purified using an automated organic purification system (Teledyne Isco, Inc.) on normal phase column using 0-50% ethyl acetate in hexanes. The fractions were combined and the crude material still contained impurities. The solvent removed by rotary evaporation and the residual material was repurified by HPLC using a 70-100% gradient of acetonitrile in water buffered with 0.1% TFA. The fractions were combined and lyophilized to give 24.7 mg of **26** in 20% yield. <sup>1</sup>H NMR (800 MHz, Chloroform-*d*) δ 8.27-6.44 (m, 32H), 5.88-2.82 (m, 13H), 2.49-2.23 (m, 2H), 2.18-0.47 (m, 22H); <sup>13</sup>C NMR (201 MHz, Chloroform-*d*) δ 163.96, 162.42, 162.10, 161.80, 161.18, 159.87, 158.93, 158.73, 143.36, 143.18, 142.78, 142.60, 142.50, 142.42, 142.15, 142.08, 141.99, 141.93, 140.71, 140.64, 140.45, 140.28, 140.16, 140.12, 139.69, 139.07, 134.55, 133.85, 133.58, 129.81, 129.69, 129.61, 129.48, 129.44, 129.37, 129.23, 129.18, 129.15, 129.12, 129.04, 129.01, 129.00, 128.78, 128.52, 128.01, 127.53, 127.35, 127.07, 126.82, 126.48, 126.43, 126.34, 126.29, 126.25, 126.15, 126.08, 126.03, 125.94, 68.16, 54.54, 54.06, 52.61, 52.25, 50.86, 48.99, 47.83, 47.20, 35.99, 35.46, 34.76, 33.33, 32.99, 31.91, 31.42, 31.26, 30.86, 30.35, 29.68, 29.67, 29.65, 29.63, 29.58, 29.43, 29.34, 29.25, 29.23, 29.07, 29.01, 28.91, 26.70, 25.16, 24.74, 24.72, 24.61, 24.00, 23.74, 22.68, 21.59, 21.53, 21.49, 21.46, 21.45, 21.44, 14.10; IR = 1550, 1453, 1283, 1145, 1088, 695, 554 cm<sup>-1</sup>; HRMS Exact Mass (C<sub>64</sub>H<sub>71</sub>ClN<sub>8</sub>O<sub>8</sub>S<sub>4</sub> + H): calculated = 1243.4039, measured = 1243.4087; [α]<sub>D</sub><sup>25</sup> = -46.0° (c 0.01, CH<sub>2</sub>Cl<sub>2</sub>).

**Procedure for the preparation of *N*-((2*E*,5*E*)-1,4-dibenzyl-5-(cyclohexylimino)piperazin-2-ylidene)-4-methylbenzenesulfonamide (**27**):**

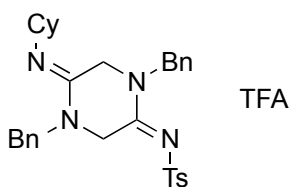

200 mg of cyclohexyl resin with a loading of 0.62 mmol/g was treated under the standard solid phase synthesis procedure. The crude cleavage solution was removed by rotary evaporation and the crude material was loaded onto an automated purification system (Teledyne Isco, Inc.) on a C18 reverse phase column and purified using a 0-100% gradient of acetonitrile in water buffered with 0.1% TFA. The fractions were

combined and the material was doubly azeotroped with anhydrous ethanol and dried on high vacuum to provide 31.4 mg of **27** in 48% yield assuming a single TFA salt. <sup>1</sup>H NMR (400 MHz, Chloroform-*d*) δ 9.77-9.71 (m, 1H), 7.63 (d, *J* = 8.2 Hz, 2H), 7.42-7.18 (m, 10H), 7.08-7.00 (m, 2H), 5.11 (s, 2H), 5.03 (s, 2H), 4.73 (s, 2H), 4.45 (s, 2H), 2.83-2.78 (m, 1H), 2.41 (s, 4H), 1.67-1.44 (m, 5H), 1.36-1.22 (m, 2H), 1.07-0.88 (m, 3H); <sup>13</sup>C NMR (101 MHz, Chloroform-*d*) δ 159.58, 158.00, 143.27, 138.95, 133.47, 131.99, 129.53, 129.36, 129.29, 129.09, 128.94, 128.54,

128.48, 126.29, 116.63, 113.77, 56.45, 55.08, 51.43, 49.53, 43.93, 32.01, 24.76, 24.20, 21.52; **IR** = 1655, 1576, 1454, 1270, 1142 1086, 982, 893, 813, 732, 690, 553  $\text{cm}^{-1}$ ; **HRMS** Exact Mass ( $\text{C}_{31}\text{H}_{36}\text{N}_4\text{O}_2\text{S} + \text{H}$ ): calculated = 529.2632, measured = 529.2684.

**Procedure for the preparation of (*E*)-*N*-benzyl-*N*-((*E*)-2-(benzyl((*E*)-2-(cyclohexylamino)-2-(tosylimino)ethyl)amino)-2-((methylsulfonyl)imino)ethyl)-2-(dibenzylamino)-*N'*-(methylsulfonyl)acetimidamide (**28**):**

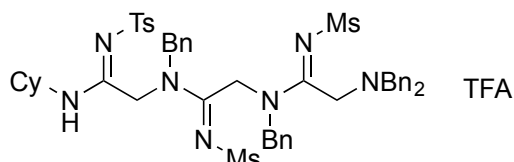

200 mg of cyclohexyl resin with a loading of 0.62 mmol/g was treated under the standard solid phase synthesis procedure. After cleavage the solvent was removed by rotary evaporation and the residual compound was dried under high vacuum. The crude

material was loaded onto an automated purification system (Teledyne Isco, Inc.) on a C18 reverse phase column using a 0-100% gradient of acetonitrile in water buffered with 0.1% TFA. The fractions were combined and the crude material was doubly azeotroped with anhydrous ethanol and dried on high vacuum to provide 59.2 mg of **28** in 43% yield assuming a single TFA salt. **<sup>1</sup>H NMR** (500 MHz,  $\text{DMSO}-d_6$ )  $\delta$  8.08-6.61 (m, 25H), 5.05-3.43 (m, 14H), 3.07-2.52 (m, 7H), 2.44-2.26 (m, 2H), 1.81-0.75 (m, 10H); **<sup>13</sup>C NMR** (201 MHz,  $\text{DMSO}-d_6$ )  $\delta$  168.38, 166.82, 164.10, 144.82, 143.91, 140.69, 140.29, 133.16, 132.33, 132.00, 131.68, 131.63, 131.41, 131.33, 131.08, 130.44, 129.86, 128.75, 128.67, 61.59, 56.79, 53.40, 46.70, 46.53, 33.79, 32.07, 27.99, 27.72, 24.03, 23.96; **IR** = 1551, 1438, 1284, 1141, 1032, 515  $\text{cm}^{-1}$ ; **HRMS** Exact Mass ( $\text{C}_{49}\text{H}_{59}\text{N}_7\text{O}_6\text{S}_3 + \text{H}$ ): calculated = 938.3762, measured = 938.3767

**Procedure for the preparation of (*E*)-*N*-benzyl-*N*-((*E*)-2-(benzyl((*E*)-2-(cyclohexylamino)-2-((methylsulfonyl)imino)ethyl)amino)-2-((methylsulfonyl)imino)ethyl)-2-(dibenzylamino)-*N'*-(methylsulfonyl)acetimidamide (**29**):**

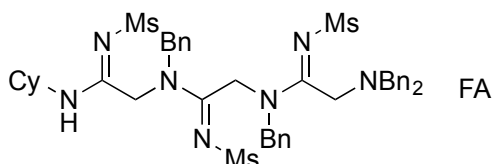

200 mg of cyclohexyl resin with a loading of 0.62 mmol/g was treated under the standard solid phase synthesis procedure. After cleavage, the solution was removed by rotary evaporation and the residual compound was dried under high vacuum. The crude

material was loaded onto an automated purification system (Teledyne Isco, Inc.) on a C18 reverse phase column and purified using a 0-100% gradient of acetonitrile in water buffered with 0.1% formic acid. The fractions were combined and the crude material was lyophilized to provide 37 mg of **29** in 37% yield assuming a formic acid salt. **<sup>1</sup>H NMR** (501 MHz,  $\text{Chloroform}-d$ )  $\delta$  7.41-6.76 (m, 20H), 6.07 (s, 1H), 5.18-4.92 (m, 2H), 4.62-4.16 (m, 4H), 3.91 (s, 2H), 3.76-3.48 (m, 5H), 3.15-2.56 (m, 9H), 1.95-0.72 (m, 12H); **<sup>13</sup>C NMR** (126 MHz,  $\text{Chloroform}-d$ )  $\delta$  166.86, 163.69, 160.38, 137.59, 134.99, 134.66, 129.73, 129.46, 129.22, 129.14, 128.94, 128.74, 128.68, 128.63, 128.50, 128.45, 128.39, 128.33, 127.86, 127.55, 127.50, 127.38, 126.72, 125.60, 59.46, 59.31, 54.58, 53.41, 52.89, 52.55, 51.88, 50.73, 48.16, 43.94, 43.78, 43.21, 33.31, 31.34, 29.66, 25.33, 25.14, 24.80, 24.07; **IR** = 1546, 1452, 1279, 1122, 966, 859, 788, 735, 700, 561  $\text{cm}^{-1}$ ; **HRMS** Exact Mass ( $\text{C}_{43}\text{H}_{55}\text{N}_7\text{O}_6\text{S}_3 + \text{H}$ ): calculated = 862.3449, measured = 862.3420.

**Procedure for the preparation of *N*-(2-((*E*)-*N*-((*E*)-2-((2-acetamidoethyl)((*E*)-2-(cyclohexylamino)-2-((methylsulfonyl)imino)ethyl)amino)-2-((methylsulfonyl)imino)ethyl)-*N'*-(methylsulfonyl)-2-(pyrrolidin-1-yl)acetimidamido)ethyl)acetamide (**30**):**

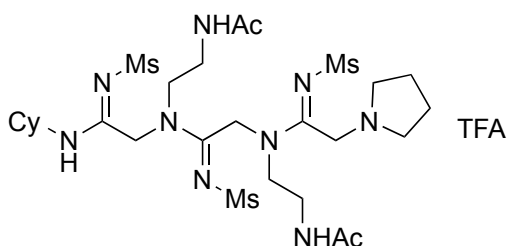

200 mg of cyclohexyl resin with a loading of 0.62 mmol/g was treated under the standard solid phase synthesis procedure. After cleavage, the solvent was removed by rotary evaporation and the residual compound was dried under high vacuum. The crude material was loaded onto an automated organic purification system (Teledyne Isco, Inc.) on a C18 reverse phase column using a 0-100% gradient of

acetonitrile in water buffered with 0.1% TFA. The fractions were combined and the crude material was doubly azeotroped with anhydrous ethanol and dried on high vacuum to provide 29.2 mg of **30** in 28% yield assuming a single TFA salt. <sup>1</sup>H NMR (500 MHz, Methanol-*d*<sub>4</sub>) δ 5.17 (s, 1H), 4.78 (s, 2H), 4.67 (s, 2H), 4.03-3.77 (m, 4H), 3.61 (s, 1H), 3.53-3.37 (m, 6H), 3.27-3.23 (m, 1H), 3.14-2.96 (m, 9H), 2.14 (s, 6H), 2.03-1.93 (m, 6H), 1.89-1.82 (m, 3H), 1.81-1.75 (m, 2H), 1.70-1.63 (m, 1H), 1.47-1.27 (m, 7H), 1.23-1.14 (m, 1H); <sup>13</sup>C NMR (126 MHz, Methanol-*d*<sub>4</sub>) δ 174.84, 174.33, 165.00, 162.90, 162.47, 159.82, 57.60, 54.44, 52.61, 51.94, 49.88, 44.46, 43.88, 43.67, 43.62, 39.40, 37.49, 34.18, 32.63, 30.77, 26.49, 26.36, 25.33, 23.64, 23.48, 22.72, 22.58; IR = 1671, 1558, 1267, 1201, 1122, 799, 519 = cm<sup>-1</sup>; HRMS Exact Mass (C<sub>27</sub>H<sub>51</sub>N<sub>9</sub>O<sub>8</sub>S<sub>3</sub> + H): calculated = 726.3095, measured = 726.3117.

**Procedure for the preparation of (*E*)-*N*-benzyl-*N*-((*E*)-2-(benzyl((*E*)-2-(cyclohexylamino)-2-(tosylimino)ethyl)amino)-2-((isopropylsulfonyl)imino)ethyl)-*N'*-((5-chlorothiophen-2-yl)sulfonyl)-2-((2-methoxyethyl)(methyl)amino)acetimidamide (**31**):**

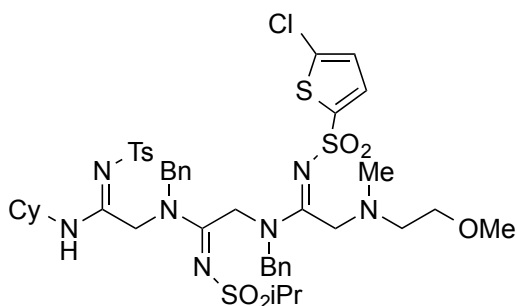

200 mg of cyclohexyl resin with a loading of 0.51 mmol/g was treated under the standard solid phase synthesis procedure. The crude cleavage solution was extracted with 1 M NaOH (10 mL). The aqueous layer was washed two times with DCM and the combined organic layers were dried over sodium sulfate. The crude material was loaded onto an automated purification system (Teledyne Isco, Inc.) on a normal phase column and purified using 0-50% ethyl acetate

in hexanes. The fractions were combined and to provide 39 mg of **31** in 40% yield. <sup>1</sup>H NMR (501 MHz, Chloroform-*d*) δ 8.66-8.00 (m, 2H), 7.87-6.45 (m, 16H), 5.38 (s, 2H), 5.22-4.00 (m, 7H), 3.92-3.49 (m, 3H), 3.45-3.14 (m, 5H), 3.08-2.99 (m, 1H), 2.95-2.68 (m, 3H), 2.47-2.26 (m, 3H), 1.86-1.44 (m, 5H), 1.44-0.95 (m, 12H); <sup>13</sup>C NMR (126 MHz, Chloroform-*d*) δ 164.32, 161.42, 161.14, 160.84, 160.52, 160.29, 159.92, 159.04, 142.09, 140.74, 136.96, 134.11, 133.89, 131.35, 130.91, 129.75, 129.63, 129.55, 129.24, 129.13, 129.02, 128.88, 128.81, 128.75, 128.49, 126.88, 126.28, 126.13, 67.82, 65.65, 58.93, 58.83, 57.61, 56.62, 55.79, 55.61, 55.41, 54.86, 54.04, 53.12, 51.78, 49.99, 49.68, 41.13, 31.29, 30.99, 29.63, 25.14, 25.09, 24.72, 21.48, 21.44, 16.54; IR = 1536, 1277, 1140, 1117, 1087, 990, 862, 755, 695, 611, cm<sup>-1</sup>; HRMS Exact Mass (C<sub>44</sub>H<sub>58</sub>ClN<sub>7</sub>O<sub>7</sub>S<sub>4</sub> + H): calculated = 960.3042, measured = 960.3049.

**Procedure for the preparation of (*E*)-*N*-(2-methoxyethyl)-*N*-((*E*)-2-((2-methoxyethyl)((*E*)-2-((tetrahydro-2*H*-pyran-4-yl)amino)-2-(tosylimino)ethyl)amino)-2-((methylsulfonyl)imino)ethyl)-2-(pyrrolidin-1-yl)-*N'*-tosylacetimidamide (**32**):**

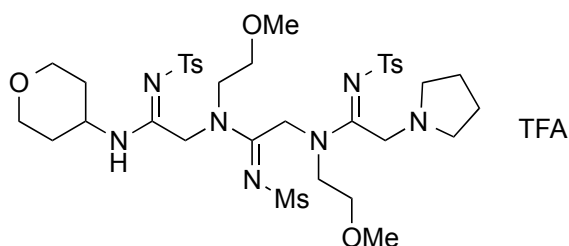

1 g of tetrahydropyranyl labeled resin with a loading of 0.52 mmol/g was treated under standard the solid phase synthesis procedure. After cleavage the solvent was removed by rotary evaporation and the residual compound was dried under high vacuum. The crude material was loaded onto an automated purification system (Teledyne Isco, Inc.) on a C18 reverse phase

column using a 0-100% gradient of acetonitrile in water buffered with 0.1% TFA. The fractions were combined and the crude material was doubly azeotroped with anhydrous ethanol and dried on high vacuum to provide 228 mg of **32** in 47% yield assuming a single TFA salt. <sup>1</sup>H NMR (500 MHz, Chloroform-*d*) δ 7.77 (d, *J* = 8.0 Hz, 3H), 7.71 (d, *J* = 7.5 Hz, 2H), 7.40 (d, *J* = 7.9 Hz, 2H), 7.27 (d, *J* = 8.8 Hz, 4H), 4.87 (s, 2H), 4.39-4.35 (m, 2H), 4.25 (s, 1H), 4.13-4.06 (m, 2H), 3.96-3.85 (m, 4H), 3.66-3.62 (m, 4H), 3.54 (t, *J* = 4.8 Hz, 3H), 3.51-3.43 (m, 2H), 3.41-3.25 (m, 9H), 2.86-2.79 (m, 3H), 2.48 (s, 3H), 2.41 (s, 3H), 2.23-2.15 (m, 2H), 1.82-1.74 (m, 3H), 1.47-1.35 (m, 2H); <sup>13</sup>C NMR (126 MHz, Chloroform-*d*) δ 162.63, 161.84, 161.27, 160.97, 158.32, 144.60, 142.45, 140.52, 138.19, 129.89, 129.24, 126.24, 126.13, 119.49, 117.18, 114.88, 68.81, 68.40, 66.47, 59.22, 59.06, 55.78, 51.63, 48.38, 47.99, 43.87, 31.74, 22.76, 21.67, 21.45; IR = 1690, 1563, 1278, 1146, 1089, 819, 682 cm<sup>-1</sup>; HRMS Exact Mass (C<sub>36</sub>H<sub>55</sub>N<sub>7</sub>O<sub>9</sub>S<sub>3</sub> + H): calculated = 826.3296, measured = 826.3300.

**Procedure for the preparation of (*E*)-*N*-benzyl-*N*-((*E*)-2-(cyclohexylamino)-2-((dibenzylcarbamoyl)imino)ethyl)-*N'*-(dibenzylcarbamoyl)-2-((2-methoxyethyl)(methyl)amino)acetimidamide (**33**):**

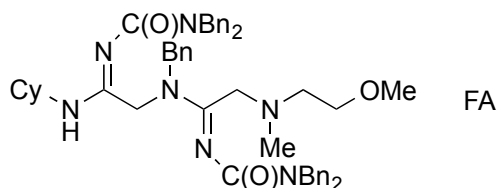

200 mg of cyclohexyl resin with a loading of 0.51 mmol/g was treated under the standard solid phase synthesis procedure. After cleavage, the solution was removed by rotary evaporation and the residual compound was dried under high vacuum. The crude material was loaded onto an automated purification

system (Teledyne Isco, Inc.) on a C18 reverse phase column and purified using a 0-100% gradient of acetonitrile in water buffered with 0.1% formic acid. The fractions were combined and the crude material was lyophilized to provide 34 mg of **33** in 39% yield assuming a formic acid salt. <sup>1</sup>H NMR (400 MHz, Chloroform-*d*) δ 7.81-6.52 (m, 25H), 5.10-4.10 (m, 10H), 4.07-3.71 (m, 1H), 3.50 (t, *J* = 4.7 Hz, 2H), 3.31-3.20 (m, 3H), 3.14-2.81 (m, 2H), 2.67 (t, *J* = 5.0 Hz, 2H), 2.25 (s, 2H), 2.18-2.05 (m, 1H), 1.82 (d, *J* = 12.9 Hz, 2H), 1.75-1.49 (m, 6H), 1.39-1.16 (m, 5H), 1.16-0.91 (m, 3H); <sup>13</sup>C NMR (126 MHz, Chloroform-*d*) δ 165.23, 163.37, 159.18, 157.10, 139.58, 138.86, 138.29, 138.16, 137.44, 137.13, 132.64, 131.32, 129.41, 129.17, 129.14, 128.78, 128.51, 128.45, 128.40, 128.34, 128.32, 128.23, 128.17, 128.12, 128.03, 128.00, 127.95, 127.72, 127.58, 127.51, 127.43, 127.30, 127.23, 127.20, 127.15, 127.04, 126.78, 126.75, 126.63, 70.34,

58.81, 58.68, 58.40, 56.25, 52.98, 52.51, 51.05, 50.37, 50.18, 49.60, 48.31, 43.88, 42.07, 33.78, 33.65, 31.81, 29.64, 28.41, 25.97, 25.47, 25.14, 24.83, 24.52, 24.29, 19.89; **IR** = 1660, 1594, 1558, 1495, 1451, 1267 1202, 1115, 963, 732, 698  $\text{cm}^{-1}$ ; **HRMS** Exact Mass ( $\text{C}_{51}\text{H}_{61}\text{N}_7\text{O}_3 + \text{H}$ ): calculated = 820.4904, measured = 820.4910

**Procedure for the preparation of (*E*)-2-(benzyl(1-(2-methoxyethyl)-2-oxo-2,5-dihydro-1*H*-imidazol-4-yl)amino)-*N*-cyclohexyl-*N'*-(methylsulfonyl)acetimidamide (**34**):**

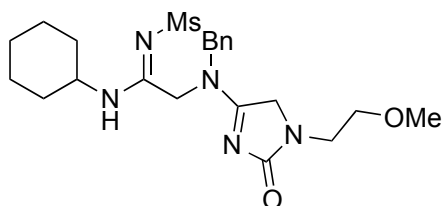

200 mg of cyclohexyl resin with a loading of 0.51 mmol/g was treated under the standard solid phase synthesis procedure. After cleavage, the crude cleavage solution was removed by rotary evaporation and the crude material was loaded onto an automated purification system (Teledyne Isco, Inc.) on a reverse-phase C18 column and purified using a 0-60% gradient of acetonitrile in water using a 0.1% formic acid buffer. The fractions containing the product were combined, however they still contained a residual impurity. These fractions were lyophilized and were subsequently loaded onto an automated purification system (Teledyne Isco, Inc.) on a normal phase column and purified using a 0-5% gradient of MeOH in dichloromethane. The fractions containing the product were combined to give 23.7 mg of **34** in 42% yield. **<sup>1</sup>H NMR** (500 MHz, Acetonitrile- $d_3$ )  $\delta$  7.54-7.16 (m, 5H), 4.83-4.06 (m, 6H), 3.80-3.66 (m, 1H), 3.50-3.42 (m, 4H), 3.33-3.23 (m, 3H), 2.90-2.82 (m, 3H), 2.57-2.01 (m, 1H), 1.87-1.48 (m, 5H), 1.39-1.02 (m, 5H); **<sup>13</sup>C NMR** (126 MHz, Acetonitrile- $d_3$ )  $\delta$  179.04, 178.77, 169.05, 168.28, 163.16, 162.69, 162.22, 161.41, 136.00, 129.96, 129.84, 129.68, 129.59, 129.38, 129.08, 128.65, 128.48, 71.71, 58.74, 54.40, 53.33, 52.55, 52.24, 52.00, 51.31, 49.97, 48.74, 43.59, 43.52, 42.74, 42.65, 42.13, 33.84, 32.04, 26.14, 25.74, 25.25; **IR** = 1544, 1447, 1371, 1270, 1135, 1083, 1051, 811, 660, 548  $\text{cm}^{-1}$ ; Exact Mass ( $\text{C}_{22}\text{H}_{33}\text{N}_5\text{O}_4\text{S} + \text{H}$ ): calculated = 464.2327, measured = 464.2337.

**Procedure for the preparation of 3-((*E*)-2-((*E*)-*N*-(4-aminobutyl)-2-(((*R*)-1-phenylethyl)amino)-*N'*-tosylacetimidamido)-*N*-((*E*)-2-(cyclohexylamino)-2-(tosylimino)ethyl)-*N'*-(methylsulfonyl)acetimidamido)propanoic acid (**35**):**

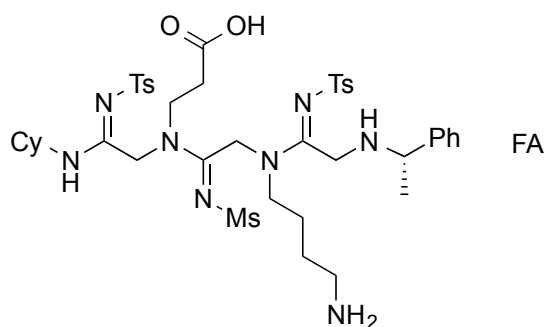

200 mg of cyclohexyl resin with a loading of 0.51 mmol/g was treated under the standard solid phase synthesis procedure. The final amination using (*S*)-methylbenzyl amine was carried out at 60° C in the microwave for 14 hours. The resin was cleaved using 95:5 DCM:TFA for 1 hour and then the cleavage solution was rotovaped. To this 2 mL of 95:2.5:2.5 TFA/ $\text{H}_2\text{O}$ /TIPS was added for 10 minutes in order to fully deprotect the side chains followed by the addition of 30 mL of water and lyophilization. The crude material was then redissolved in water/acetonitrile 1:1 and was loaded onto an automated purification system (Teledyne Isco, Inc.) on a C18 reverse phase column using a 0-55% gradient of acetonitrile in water buffered with 0.1% formic acid. The fractions were combined and lyophilized to provide 24 mg of **35** in 25% yield assuming a single formate

salt. **<sup>1</sup>H NMR** (500 MHz, Acetonitrile-*d*<sub>3</sub>) δ 9.70-9.44 (m, 1H), 7.99-7.67 (m, 4H), 7.56-7.25 (m, 9H), 4.57-4.07 (m, 2H), 4.05-3.46 (m, 7H), 3.31 (d, *J* = 12.4 Hz, 1H), 3.26-2.93 (m, 3H), 2.85-2.63 (m, 3H), 2.63-2.28 (m, 9H), 2.01-1.61 (m, 12H), 1.55-1.12 (m, 11H); **<sup>13</sup>C NMR** (126 MHz, Acetonitrile-*d*<sub>3</sub>) δ 179.49, 168.39, 165.05, 163.90, 146.00, 144.32, 143.54, 143.36, 141.50, 130.85, 130.66, 130.03, 129.89, 128.58, 128.15, 127.86, 127.34, 111.37, 60.28, 54.38, 52.45, 52.13, 51.64, 50.18, 47.68, 44.83, 43.97, 40.15, 37.34, 32.85, 27.10, 26.69, 26.32, 25.86, 24.68, 22.05, 21.87; **IR** = 1539, 1265, 1141, 1087, 733, 695, 523 cm<sup>-1</sup>; **HRMS** Exact Mass (C<sub>42</sub>H<sub>60</sub>N<sub>8</sub>O<sub>8</sub>S<sub>3</sub> + H): calculated = 901.3769, measured = 901.3756; [ $\alpha$ ]<sub>D</sub><sup>25</sup> = -19.0° (c 0.01, CH<sub>3</sub>OH).

**Procedure for the preparation of (*R*)-3-((*E*)-2-((*E*)-*N*-(2-methoxyethyl)-*N'*-(methylsulfonyl)-2-(pyrrolidin-1-yl)acetimidamido)-*N*-(tetrahydro-2*H*-pyran-4-yl)-*N'*-tosylacetimidamido)butanamide (**36**):**

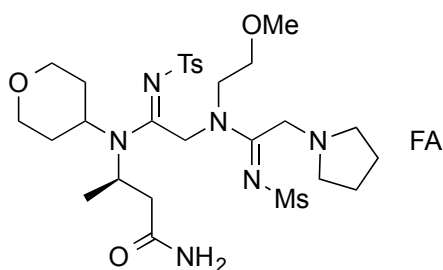

200 mg of rink resin with a substitution of 0.51 mmol/g was deprotected 2x with 20% piperidine in DMF (10 mL) for 20 minutes followed by washing of the resin. Fmoc-L-beta-homoalanine, diisopropylcarbodiimide, hydroxylbenzotriazole and diisopropylamine were all dissolved to 0.1 M in DMF, and 4 mL of this solution was added to the resin for 1 hour. The coupling was then repeated. The resin was then washing the resin 3x with 10 mL of DMF. The Fmoc group

washed with excess DMF and treated with 10 mL of 20% piperidine in DMF 2x and then the resin was washed 3x with DMF followed by 3x with DCM and was dried under high vacuum. Reductive amination with was carried out as described in solid phase procedures. The resin was then treated with standard solid phase peptide synthesis procedures. The product was cleaved with 10 ml of 95:5 TFA/H<sub>2</sub>O for 1 hour. After cleavage, the solution was diluted into 30 mL of water and lyophilized. The crude material was loaded onto an automated purification system (Teledyne Isco, Inc.) on a C-18 reverse phase column and purified using a 0-100% gradient of acetonitrile in water buffered with 0.1% formic acid. The fractions were combined and lyophilized to provide 34 mg of **36** in 48% yield assuming a formic acid salt. **<sup>1</sup>H NMR** (501 MHz, Chloroform-*d*) δ 7.76-7.70 (m, 2H), 7.30-7.22 (m, 2H), 5.86-5.10 (m, 2H), 4.99-4.89 (m, 1H), 4.82-4.74 (m, 1H), 4.55 (s, 1H), 4.22 (s, 1H), 4.12-3.88 (m, 7H), 3.65 (s, 2H), 3.50-3.41 (m, 1H), 3.35-3.28 (m, 3H), 3.22 (s, 2H), 3.05-2.96 (m, 3H), 2.67 (s, 3H), 2.42-2.35 (m, 4H), 2.09-1.84 (m, 2H), 1.73 (s, 4H), 1.25 (d, *J* = 7.3 Hz, 4H); **<sup>13</sup>C NMR** (126 MHz, Chloroform-*d*) δ 172.50, 171.82, 161.26, 142.52, 140.80, 129.40, 129.24, 125.94, 125.76, 71.16, 67.78, 67.49, 66.73, 66.55, 58.98, 56.96, 55.74, 53.83, 52.98, 52.44, 50.86, 49.50, 48.41, 43.72, 43.35, 40.74, 40.14, 30.74, 30.34, 29.15, 28.77, 23.62, 21.45, 18.72, 18.57; **IR** = 1600, 1545, 1452, 1278, 1144, 1087, 750, 696, 578 cm<sup>-1</sup>; **HRMS** Exact Mass (C<sub>28</sub>H<sub>46</sub>N<sub>6</sub>O<sub>7</sub>S<sub>2</sub> + H): calculated = 643.2942, measured = 643.2937; [ $\alpha$ ]<sub>D</sub><sup>25</sup> = +11.0° (c 0.01, CH<sub>2</sub>Cl<sub>2</sub>).

**Procedure for the preparation of (*E*)-2-chloro-*N*-cyclohexyl-*N'*-tosylacetimidamide (**41**):**

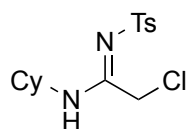

200 mg of cyclohexyl resin with a loading of 0.62 mmol/g was treated under the standard solid phase synthesis procedure. The crude cleavage solution was poured into a separatory funnel containing 10 mL of DCM and was washed

twice with saturated  $\text{NaHCO}_3$  (10 mL). The combined organic layers were dried over sodium sulfate and the crude material was loaded onto silica gel and was purified using an automated purification system (Teledyne Isco, Inc.) on a normal phase column using a 0-40% gradient of ethylacetate in hexanes to provide 37 mg of **41** in 90% yield.  **$^1\text{H}$  NMR** (400 MHz, Chloroform-*d*)  $\delta$  7.84-7.76 (m, 2H), 7.31-7.23 (m, 2H), 6.52 (s, 1H), 4.88 (s, 2H), 3.85 (m 1H), 2.41 (s, 3H), 1.98-1.86 (m, 2H), 1.81-1.54 (m, 3H), 1.45-1.13 (m, 6H);  **$^{13}\text{C}$  NMR** (101 MHz, Chloroform-*d*)  $\delta$  158.99, 142.46, 140.09, 129.26, 126.23, 50.81, 42.29, 31.68, 25.28, 24.30, 21.53, 21.48; **IR** = 1549 1452, 1276 1116, 965 780, 733, 699, 561, 519  $\text{cm}^{-1}$ ; **HRMS** Exact Mass ( $\text{C}_{15}\text{H}_{21}\text{ClN}_2\text{O}_2\text{S} + \text{H}$ ): calculated = 329.1085, measured = 329.1094.

## 7. Calculations:

We performed quantum chemical energy calculations in order to determine whether the *trans* or *cis* amidine structure is more stable. First, we used 2D Sketcher and MacroModel with OPLS 2005 force field to construct and optimize the entry structures. For each of the compounds, we set the dihedral angles to 0° and 180° for *cis*- and *trans*- initial structures, respectively (see below). We optimized *Cis*- and *Trans*- initial structures of the peptidines with Jaguar. DFT with B3LYP functional and 6-31G\*\* basis set were used. The parts of the molecules other than R-group were constrained. We determined which structure is more stable by comparing the energies after the optimizations.

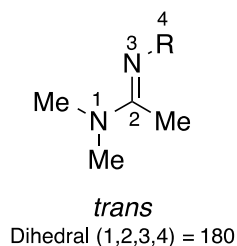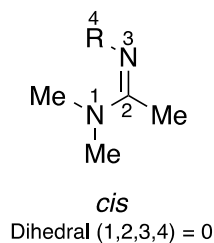

## 8. Crystallography:

To 10 mg of **28** as the TFA salt DCM (10 mL) was added followed by and 2M HCl in diethyl ether (200  $\mu$ L) and the solution was rotovaped. This process was repeated 3x. The residual material was dissolved in acetonitrile/water and 1 mL of 1 M HCl was added, this solution was frozen and lyophilized removing any remaining TFA. Crystallization in 1:1 DCM/Hexanes provided crystals amenable to diffraction. We were not able to crystallize **28** as a freebase.

Table 1. Crystal data and structure refinement for **28**.

|                                         |                                                                                 |                 |
|-----------------------------------------|---------------------------------------------------------------------------------|-----------------|
| Identification code                     | 12068                                                                           |                 |
| Empirical formula                       | C <sub>49</sub> H <sub>60</sub> Cl N <sub>7</sub> O <sub>6</sub> S <sub>3</sub> |                 |
| Formula weight                          | 974.67                                                                          |                 |
| Temperature                             | 93(2) K                                                                         |                 |
| Wavelength                              | 1.54187 Å                                                                       |                 |
| Crystal system                          | Monoclinic                                                                      |                 |
| Space group                             | P 2 <sub>1</sub> /c                                                             |                 |
| Unit cell dimensions                    | a = 12.9375(2) Å                                                                | a = 90°.        |
|                                         | b = 11.6146(2) Å                                                                | b = 94.227(7)°. |
|                                         | c = 32.205(2) Å                                                                 | g = 90°.        |
| Volume                                  | 4826.0(4) Å <sup>3</sup>                                                        |                 |
| Z                                       | 4                                                                               |                 |
| Density (calculated)                    | 1.341 Mg/m <sup>3</sup>                                                         |                 |
| Absorption coefficient                  | 2.373 mm <sup>-1</sup>                                                          |                 |
| F(000)                                  | 2064                                                                            |                 |
| Crystal color                           | ?                                                                               |                 |
| Crystal size                            | 0.150 x 0.050 x 0.030 mm <sup>3</sup>                                           |                 |
| Theta range for data collection         | 2.752 to 65.089°                                                                |                 |
| Index ranges                            | -14 ≤ h ≤ 15, -13 ≤ k ≤ 13, -37 ≤ l ≤ 37                                        |                 |
| Reflections collected                   | 68998                                                                           |                 |
| Independent reflections                 | 8226 [R(int) = 0.1222]                                                          |                 |
| Completeness to theta = 67.687°         | 94.3 %                                                                          |                 |
| Refinement method                       | Full-matrix least-squares on F <sup>2</sup>                                     |                 |
| Data / restraints / parameters          | 8226 / 2 / 605                                                                  |                 |
| Goodness-of-fit on F <sup>2</sup>       | 1.086                                                                           |                 |
| Final R indices [I > 2σ(I) = 5884 data] | R <sub>1</sub> = 0.0697, R <sub>2</sub> = 0.1864                                |                 |
| R indices (all data, ? Å)               | R <sub>1</sub> = 0.0909, R <sub>2</sub> = 0.2067                                |                 |
| Extinction coefficient                  | 0.00144(18)                                                                     |                 |
| Largest diff. peak and hole             | 0.655 and -0.540 Å <sup>-3</sup>                                                |                 |

## 9. References:

- (1) Yates, M. H.; Kallman, N. J.; Ley, C. P.; Wei, J. N. *Org Process Res Dev* 2009, 13, 255.
- (2) Ma, L. A.; Xie, C. F.; Ma, Y. H.; Liu, J. A.; Xiang, M. L.; Ye, X.; Zheng, H.; Chen, Z. Z.; Xu, Q. Y.; Chen, T.; Chen, J. Y.; Yang, J. C.; Qiu, N.; Wang, G. C.; Liang, X. L.; Peng, A. H.; Yang, S. Y.; Wei, Y. Q.; Chen, L. J. *J Med Chem* 2011, 54, 2060.
- (3) Cuenca, F.; Moore, M. J. B.; Johnson, K.; Guyen, B.; De Cian, A.; Neidle, S. *Bioorg Med Chem Lett* 2009, 19, 5109.
- (4) Brown, E. G.; Nuss, J. M. *Tetrahedron Lett* 1997, 38, 8457.
- (5) Moura-Letts, G.; DiBlasi, C. M.; Bauer, R. A.; Tan, D. S. *P Natl Acad Sci USA* 2011, 108, 6745.

## 10. Catalog of $^1\text{H}$ , $^{13}\text{C}$ and Analytical HPLC Traces: Solution Phase

Due to the broad peaks observed in both  $^1\text{H}$  and  $^{13}\text{C}$  NMR spectra of numerous oligomeric peptidines, we further demonstration of purity of these compounds by running analytical HPLC. All analytical HPLCs were run from 0-100% over 40 minutes using water/acetonitrile with 0.1% TFA with the exception of compound **36**, where FA was used instead of TFA.

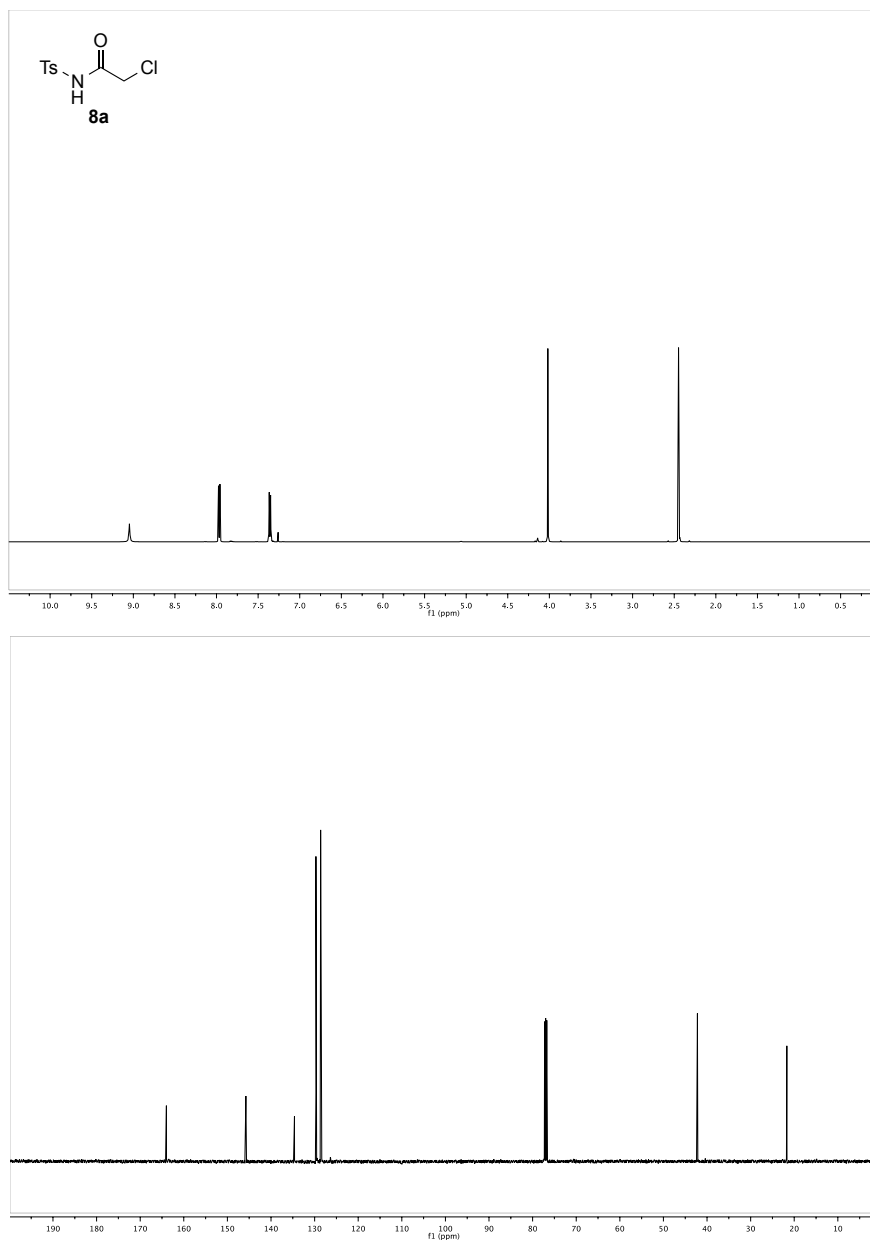

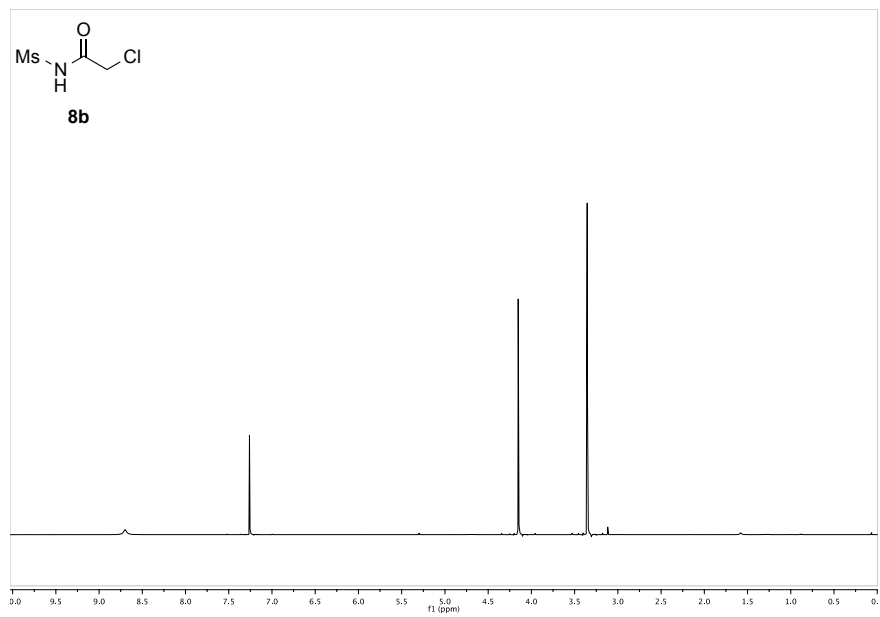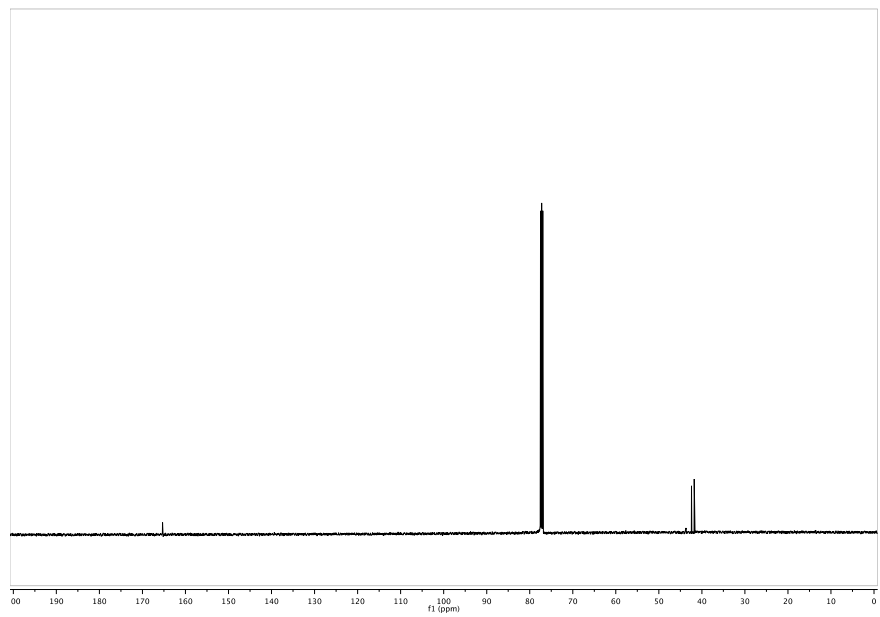

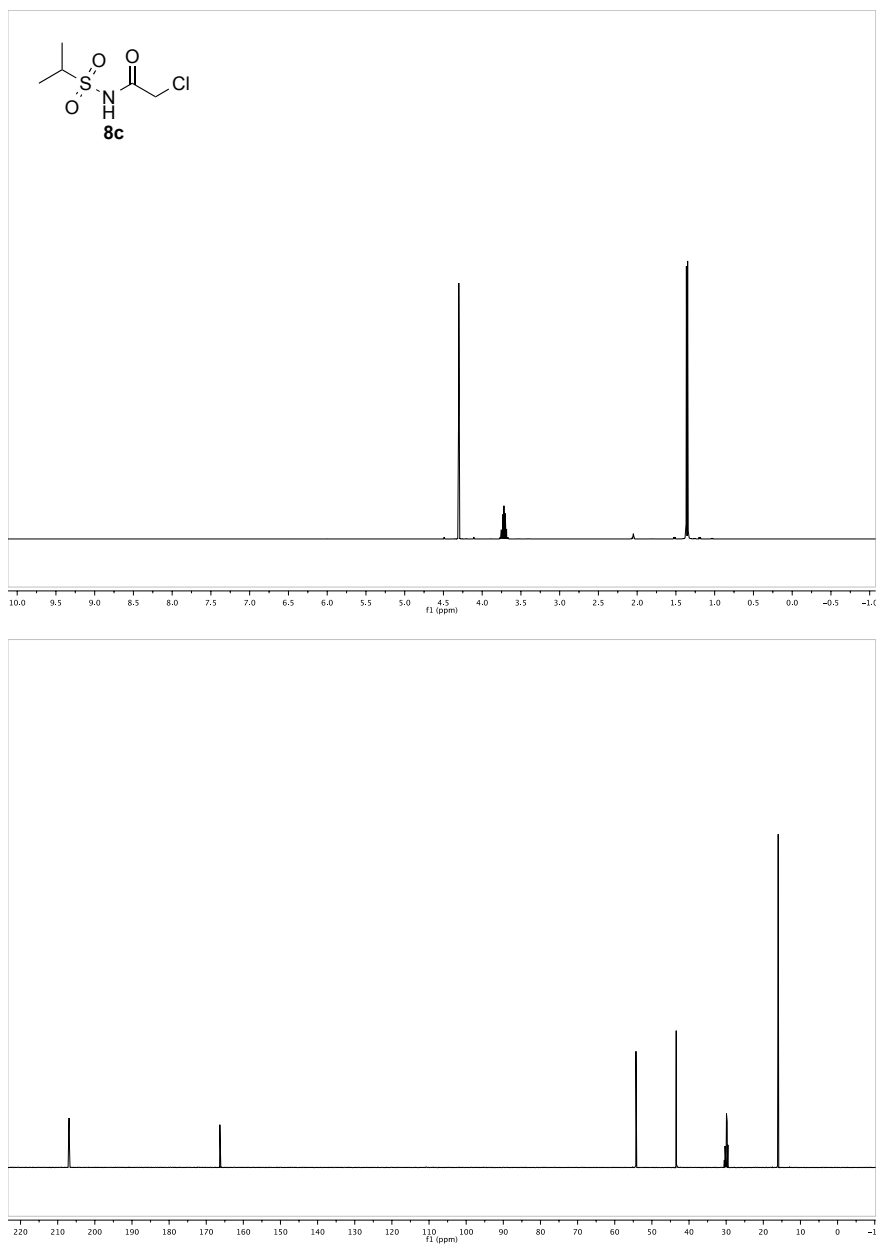

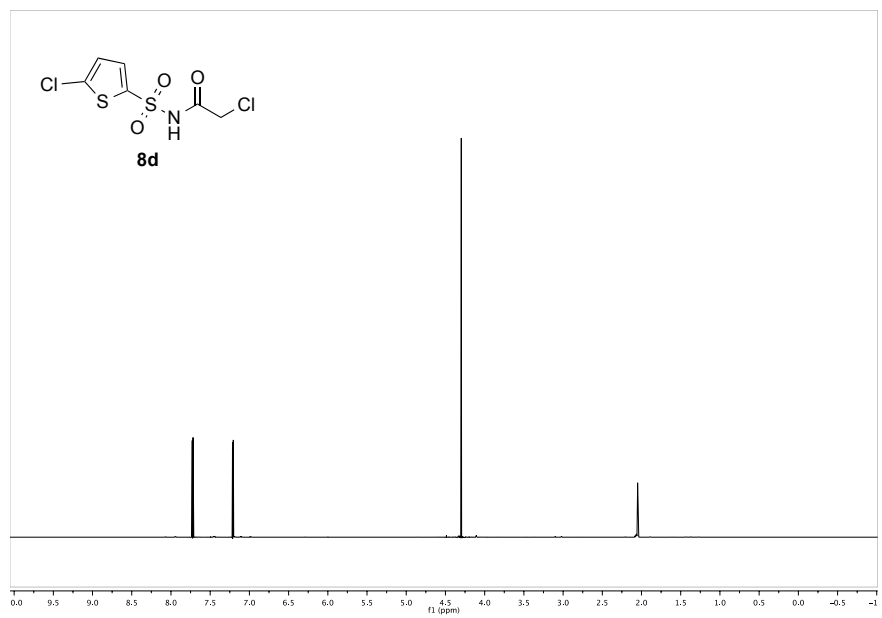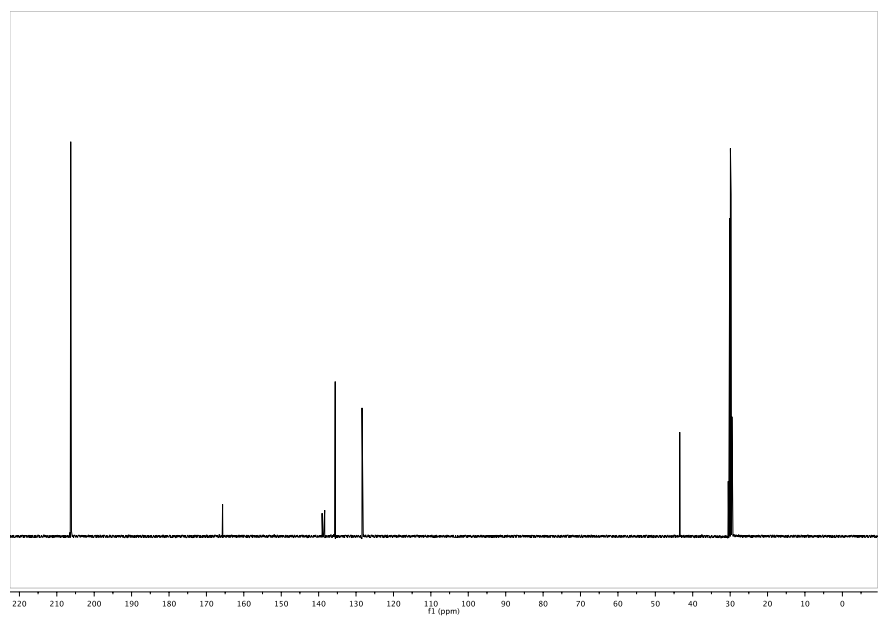

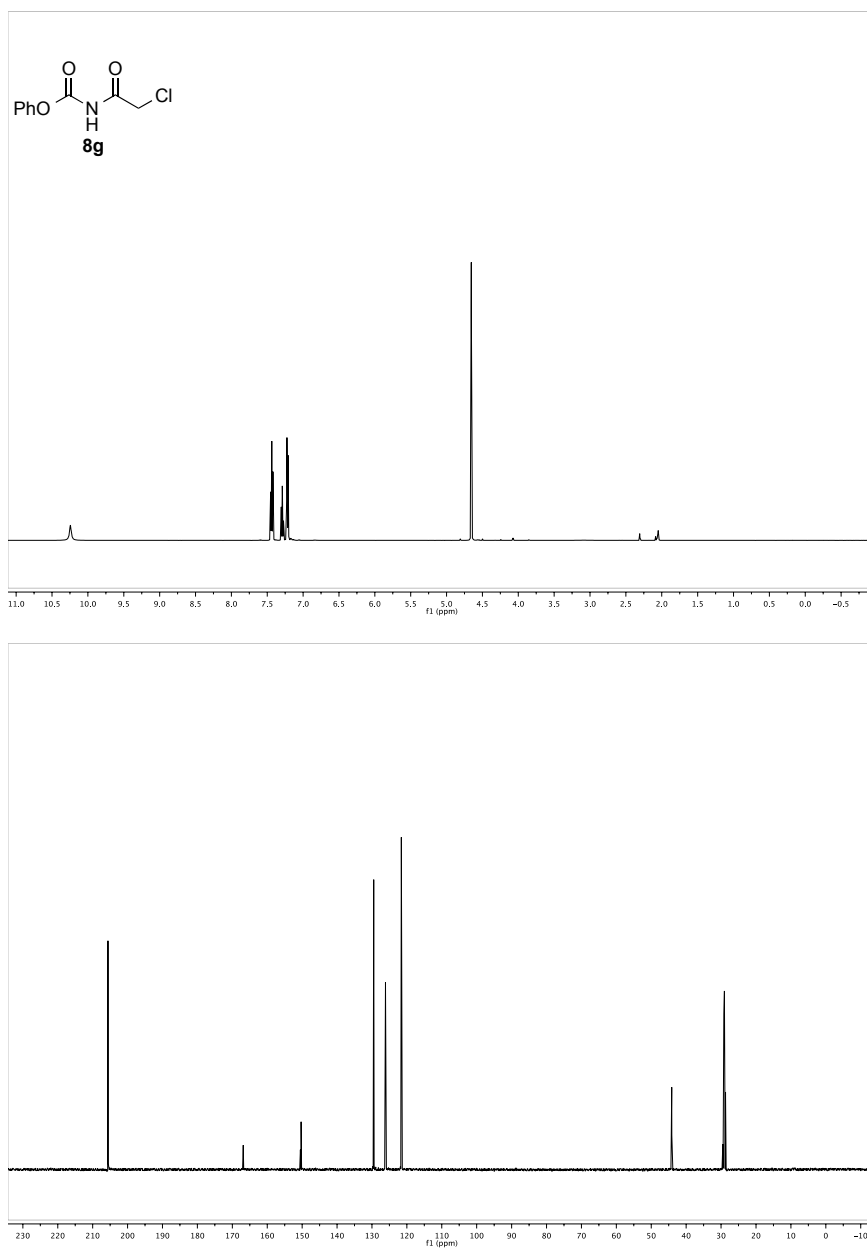

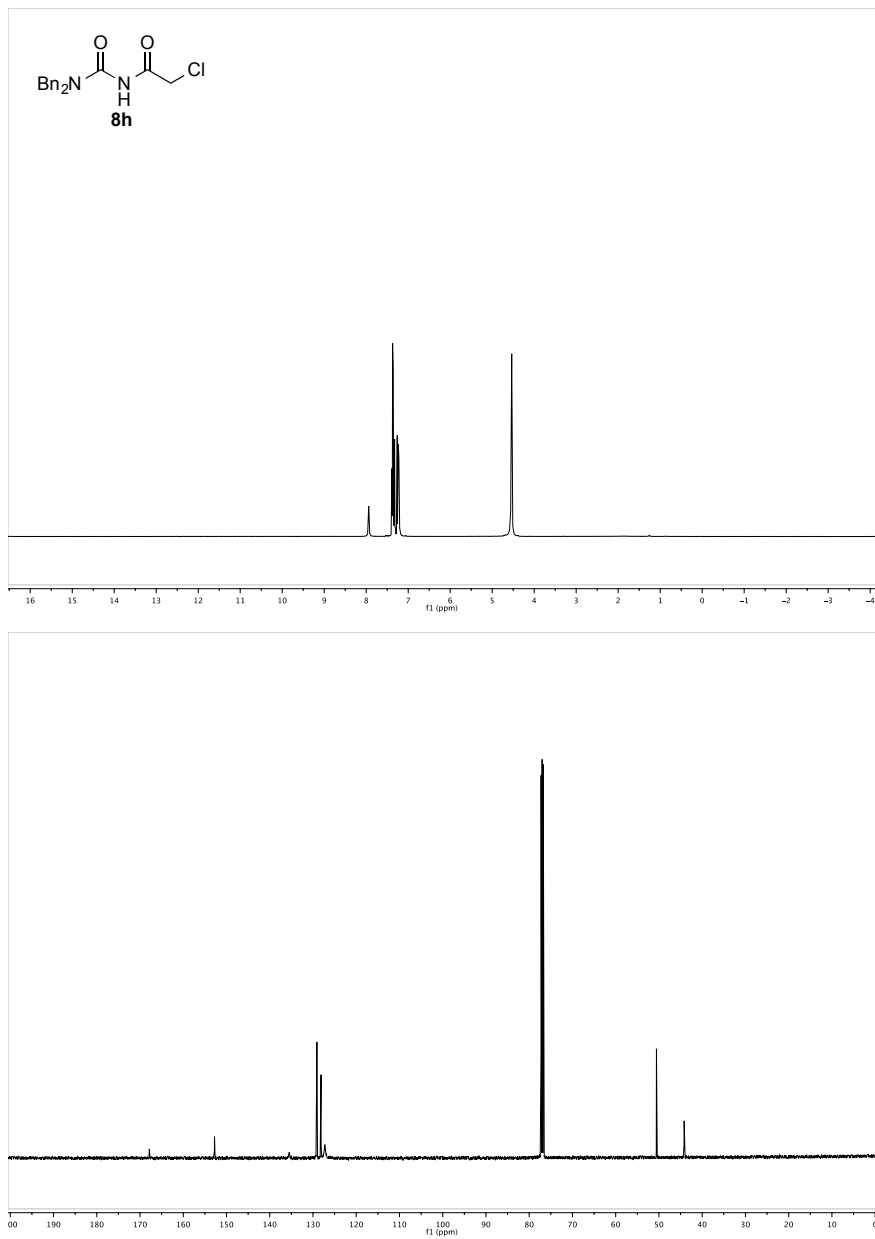

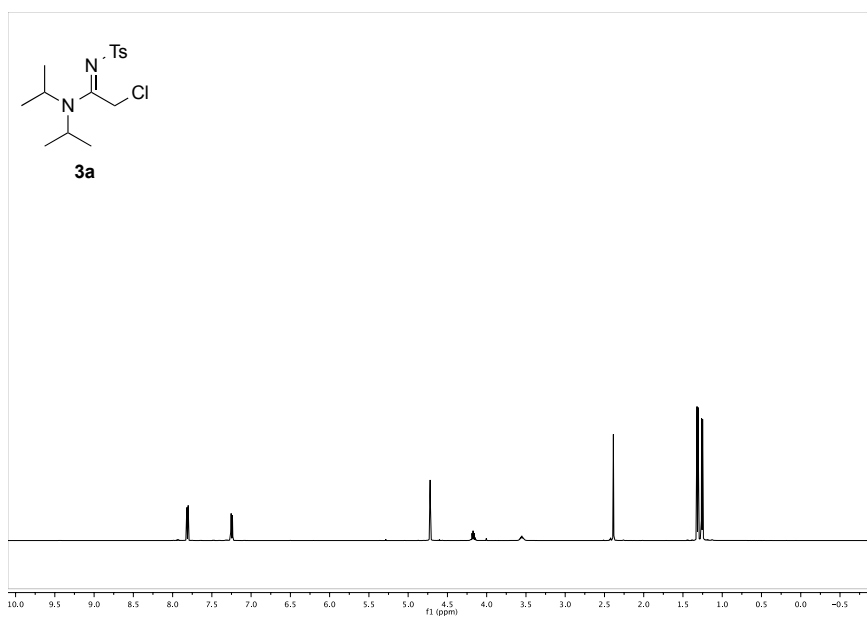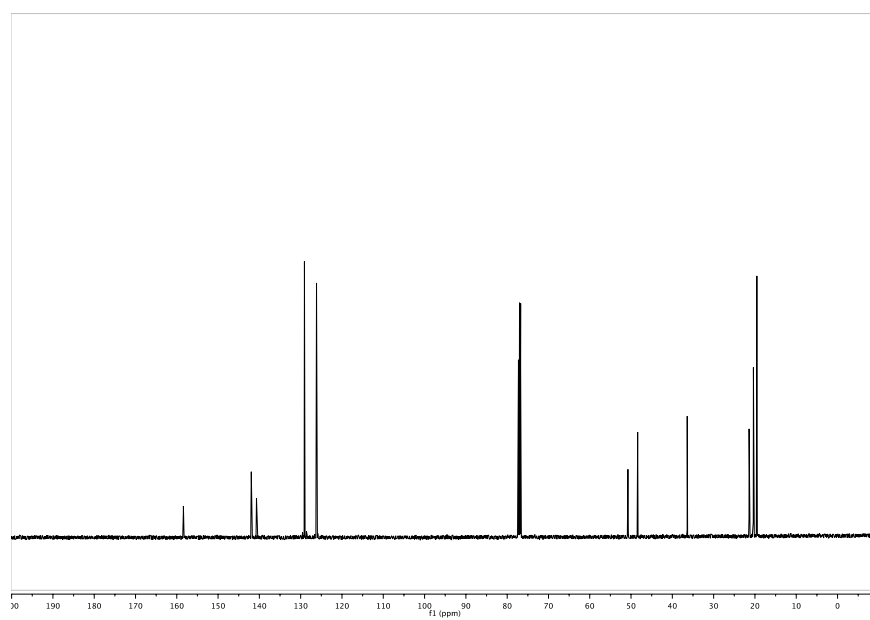

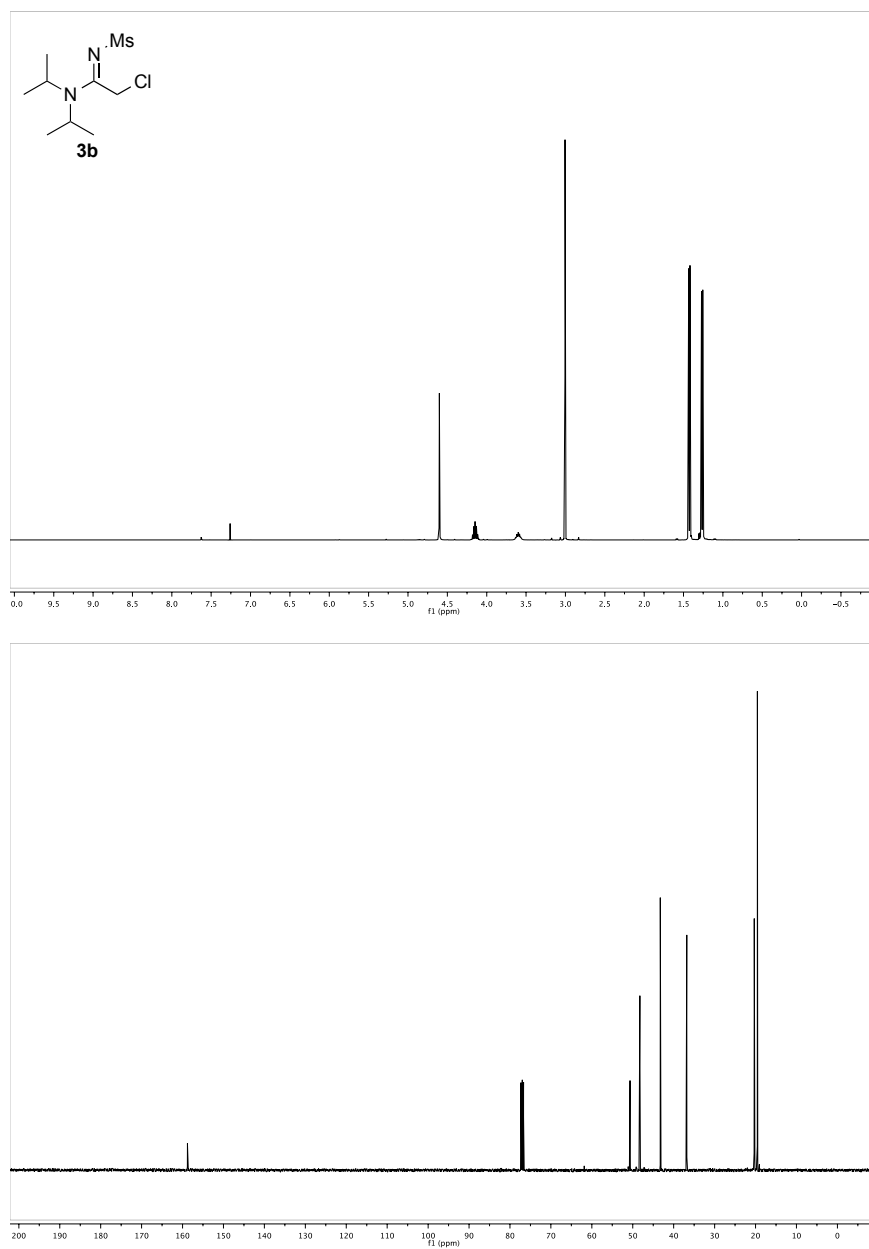

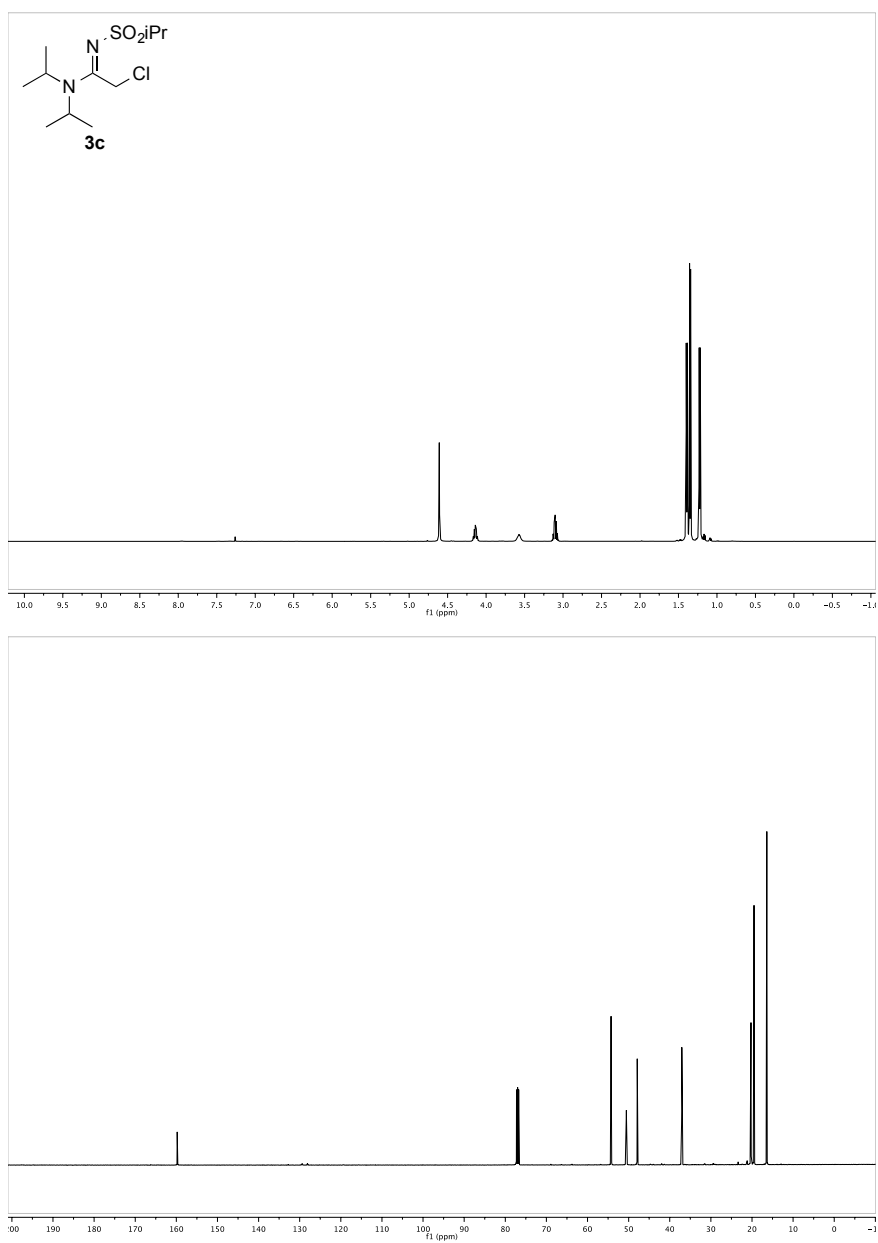

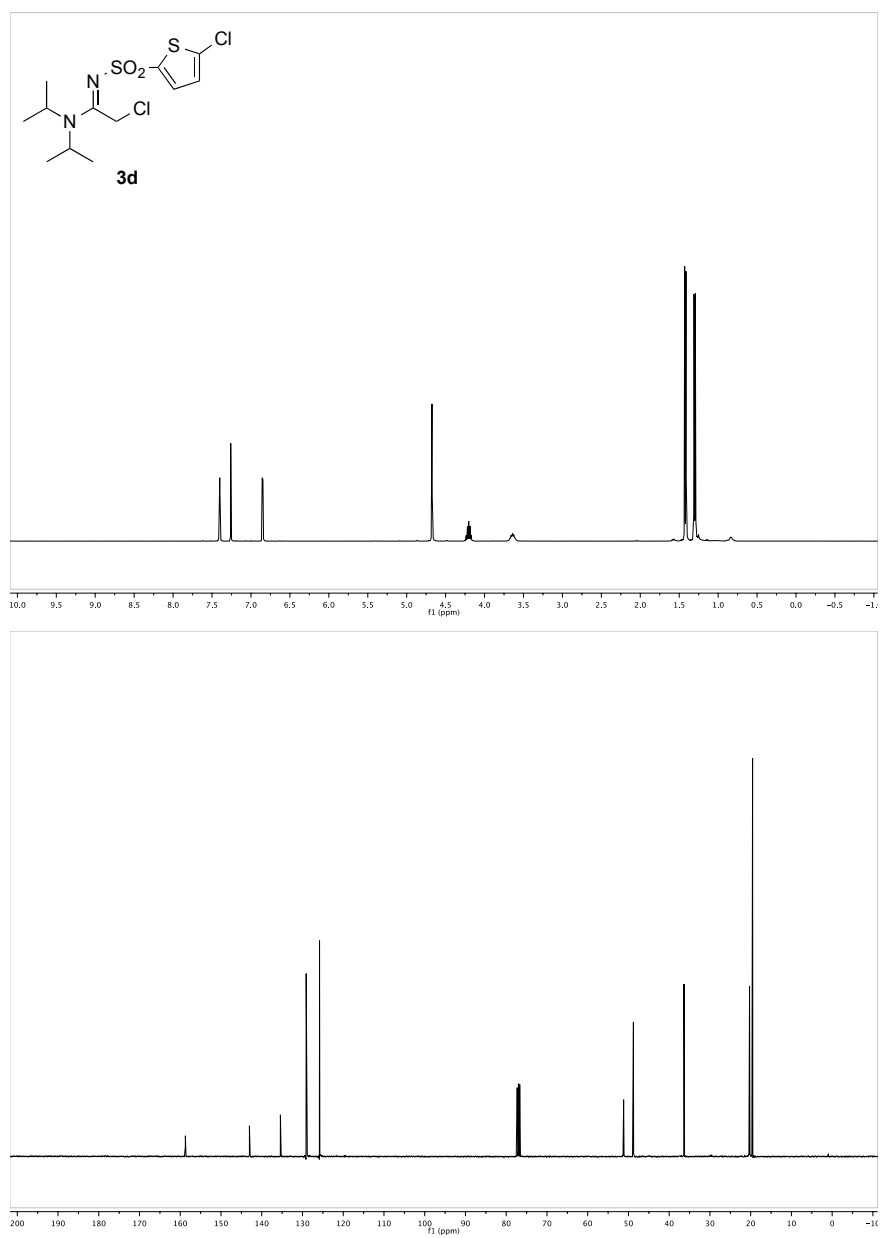

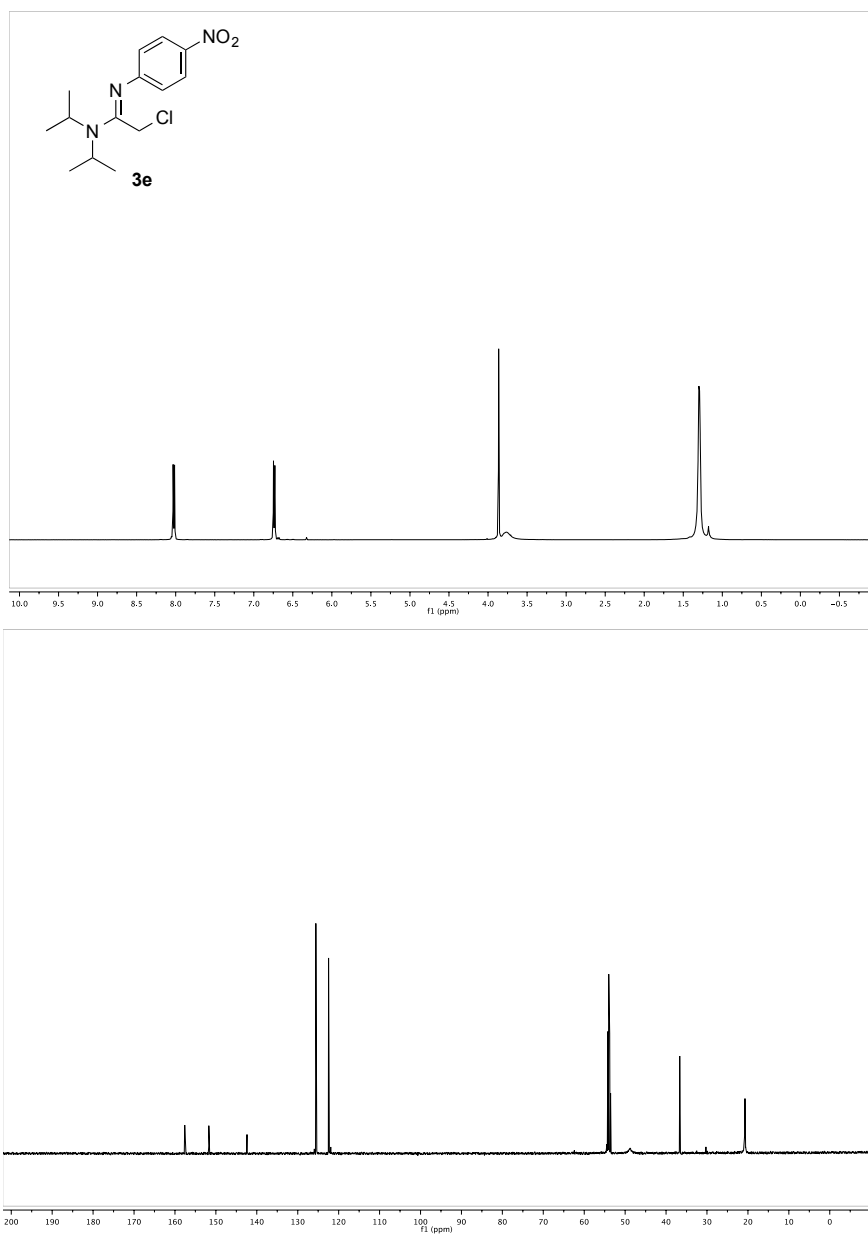

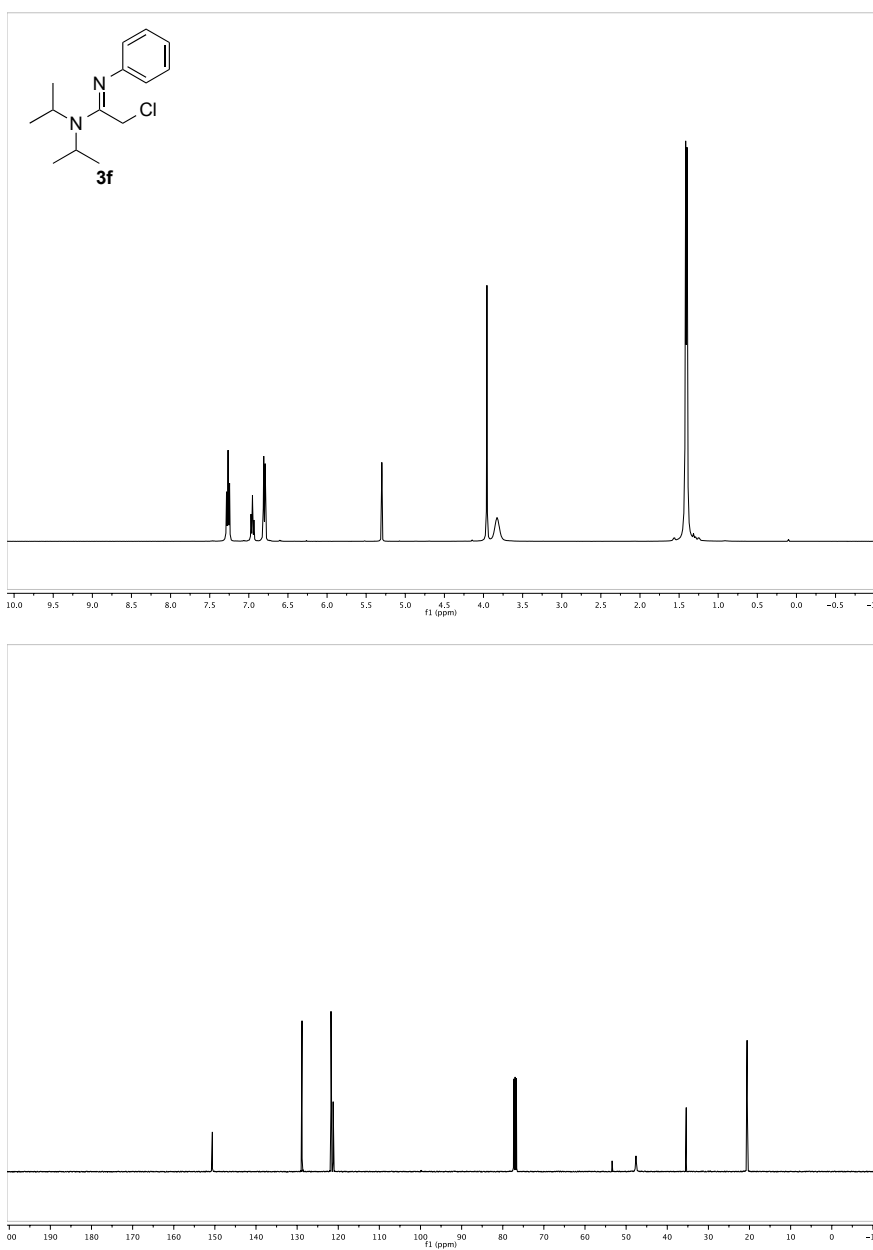

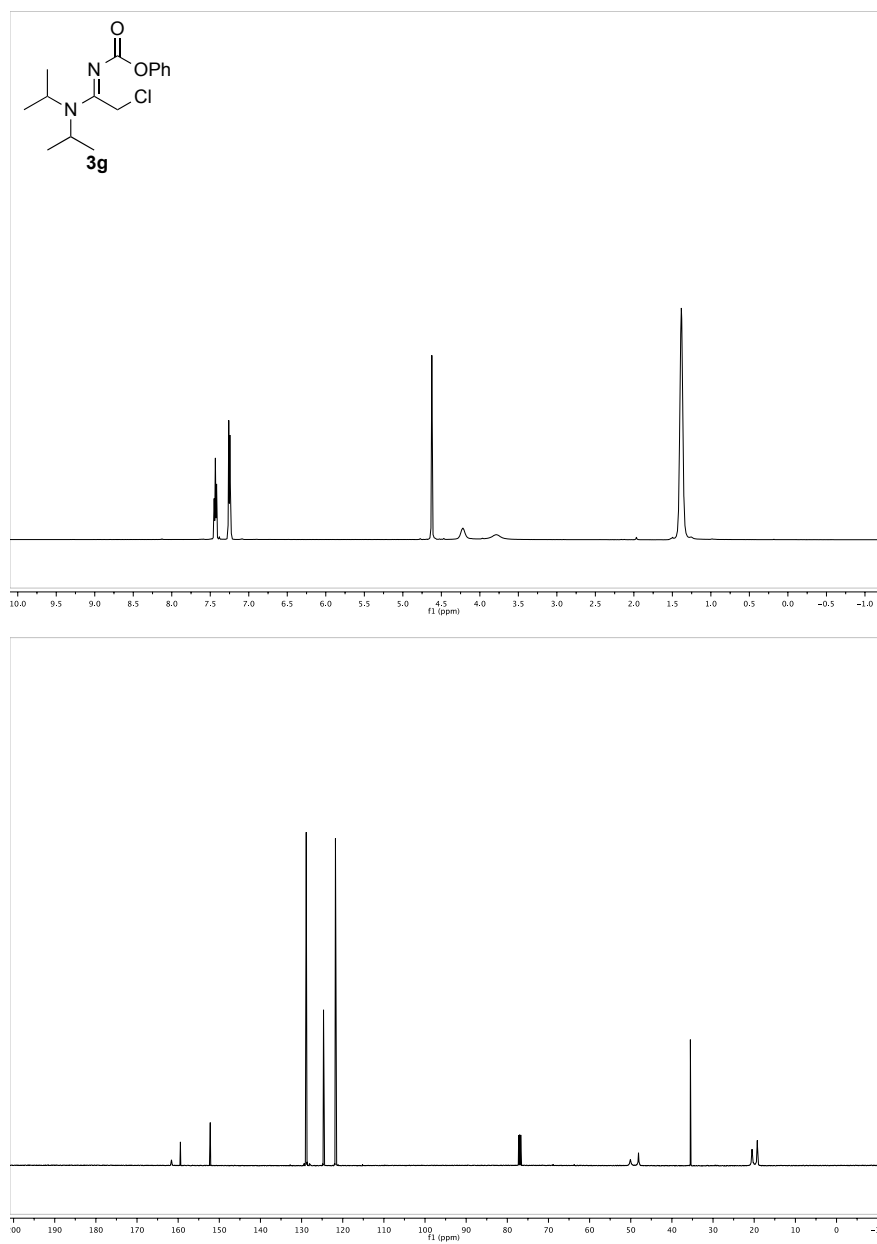

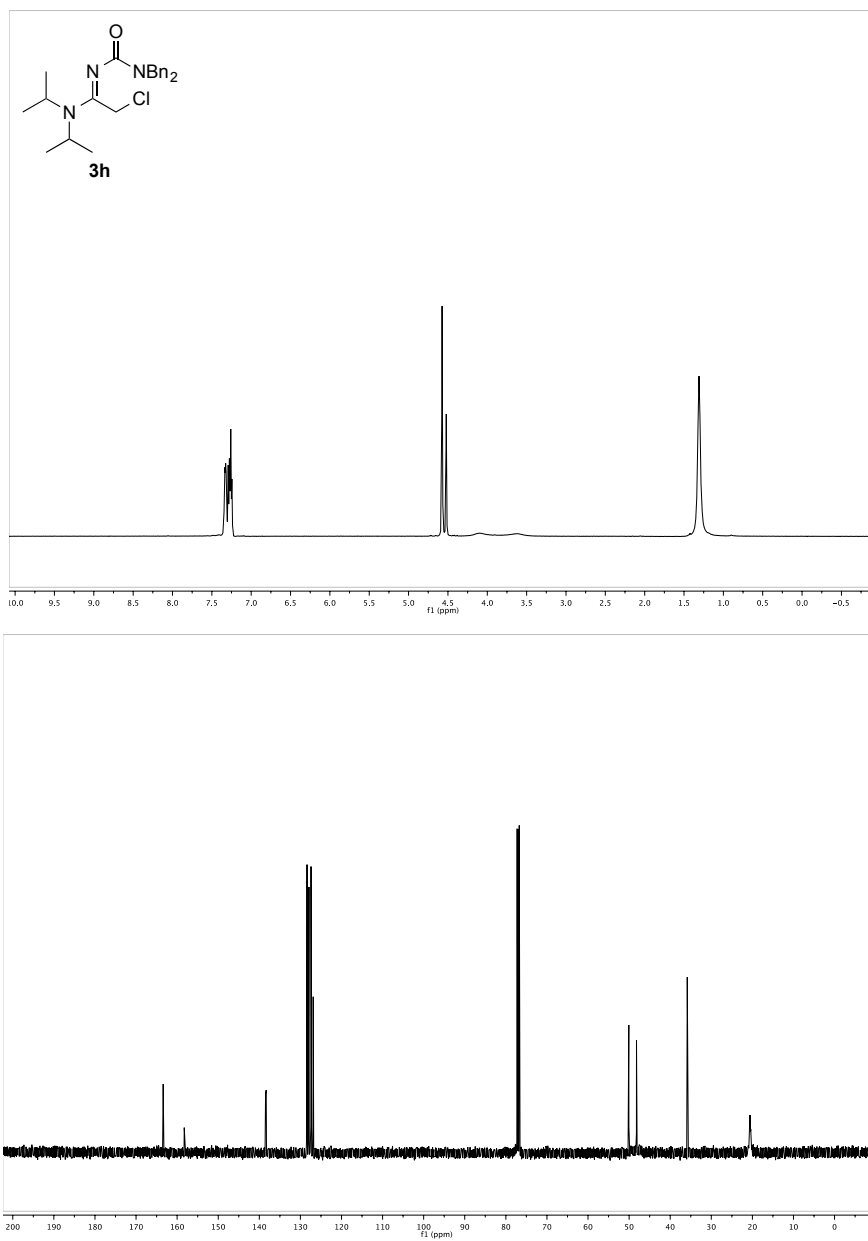

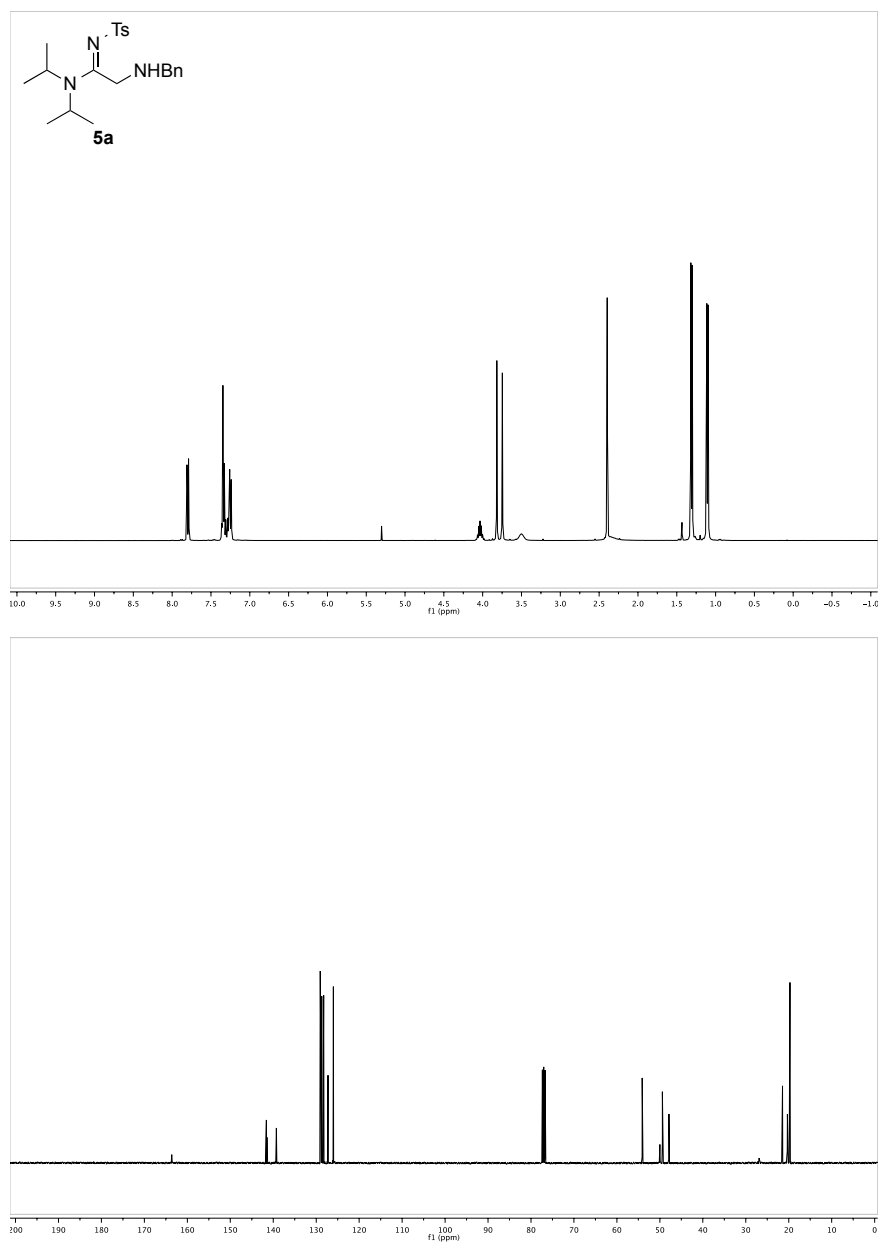

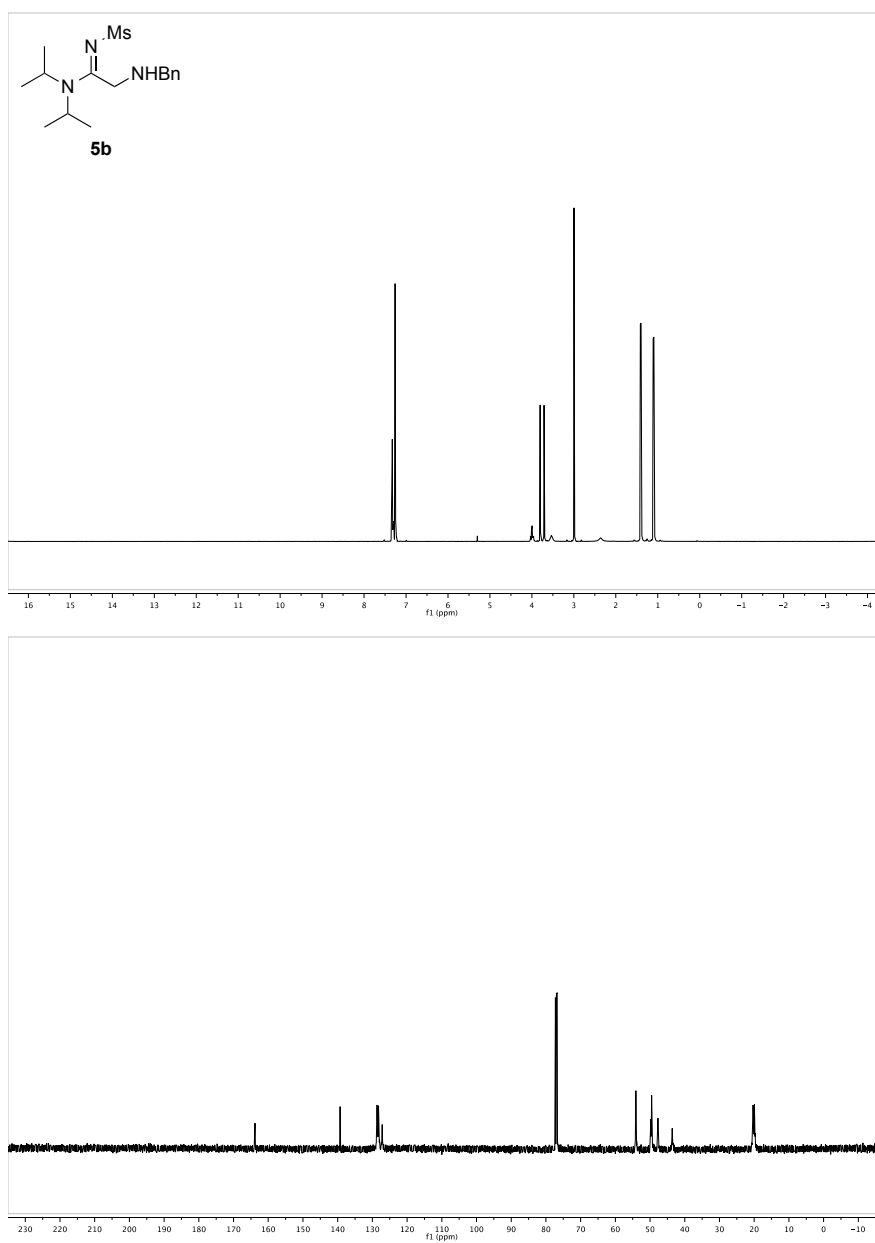

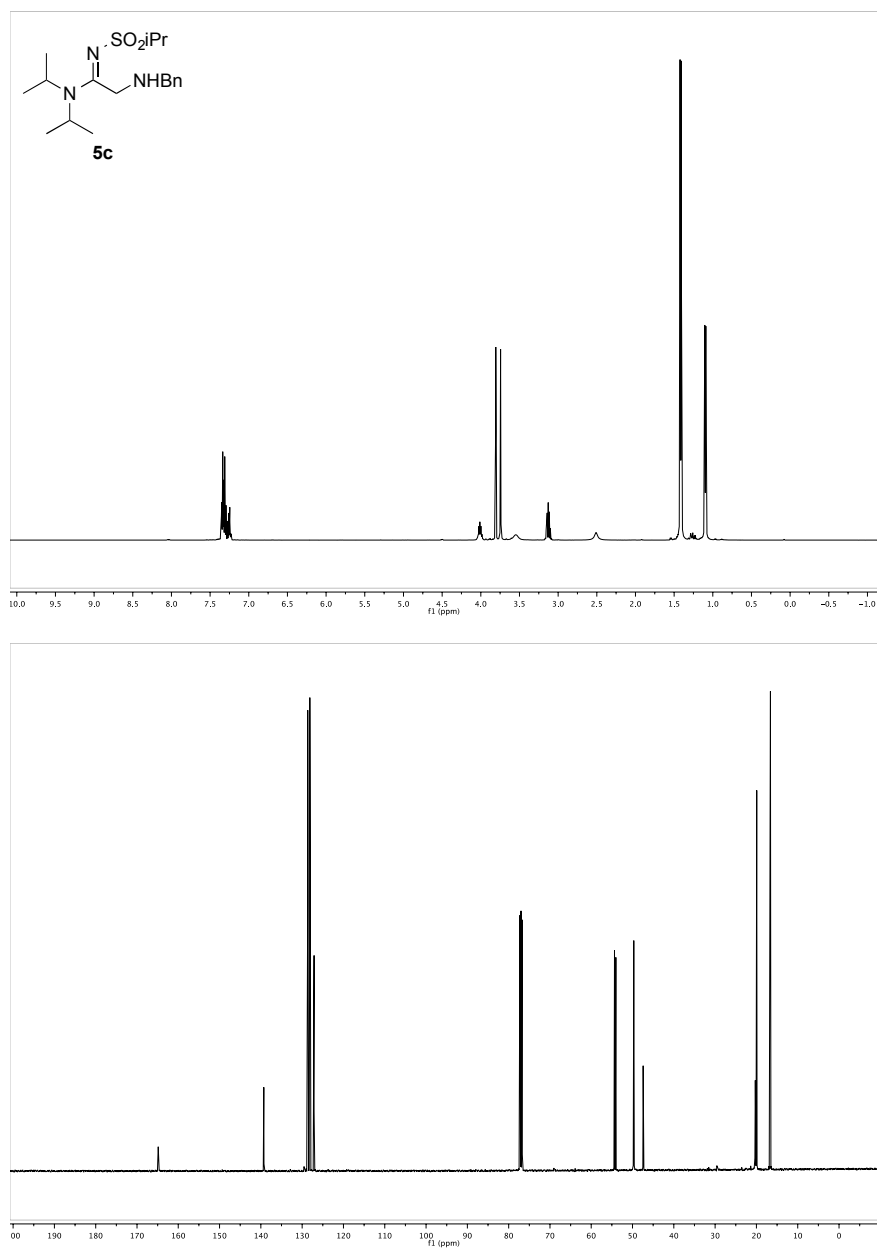

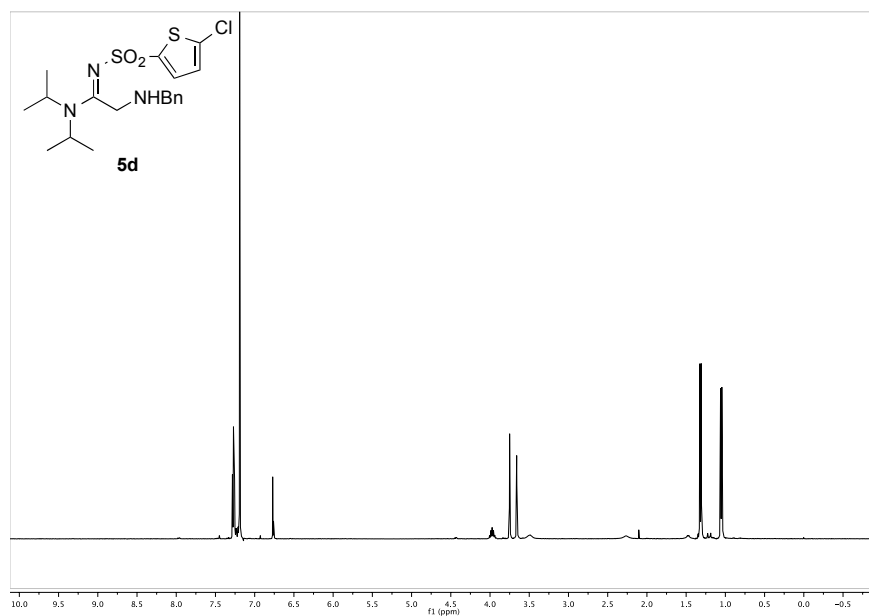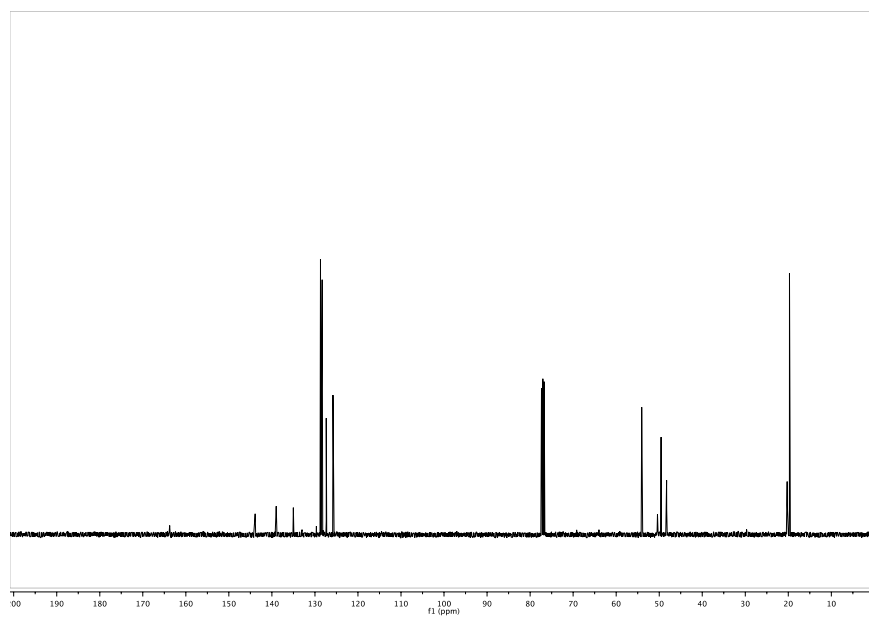

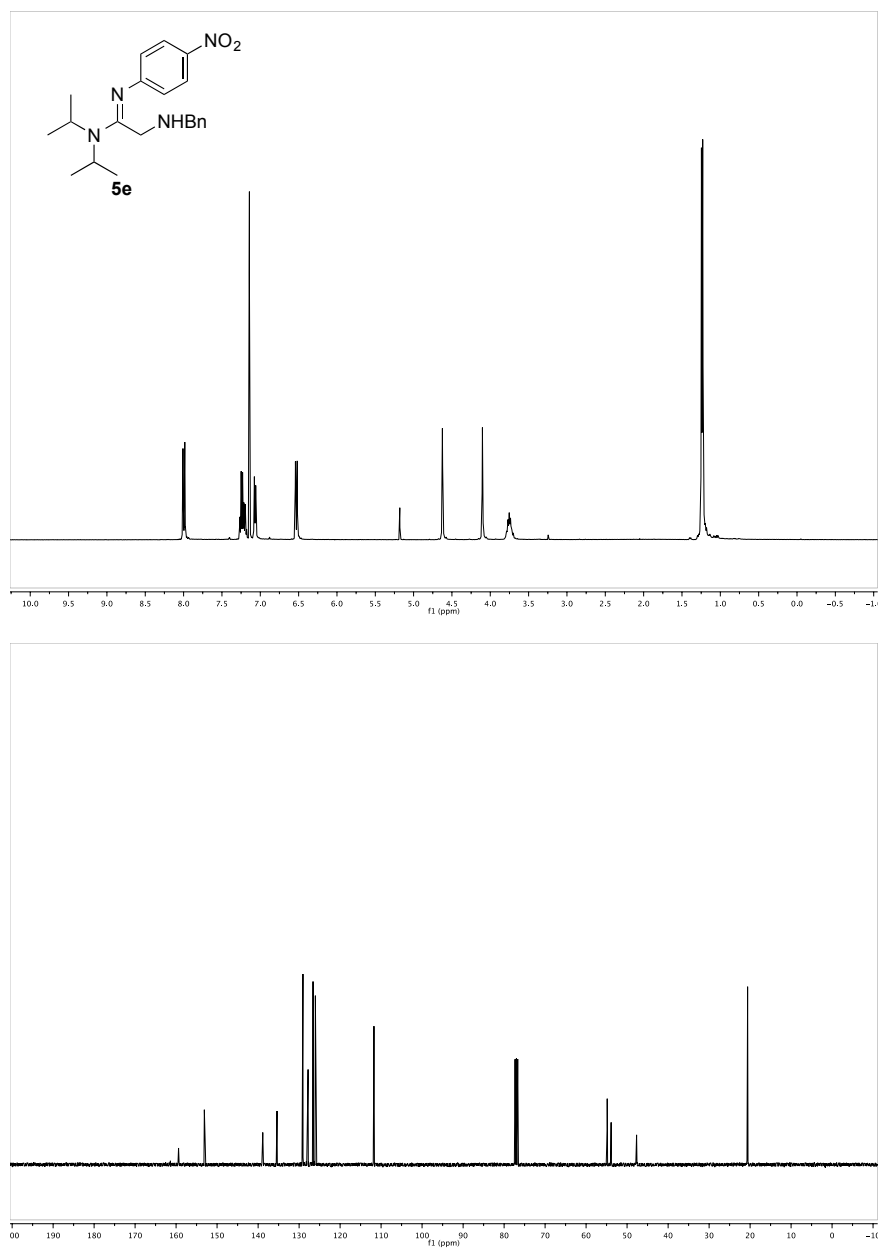

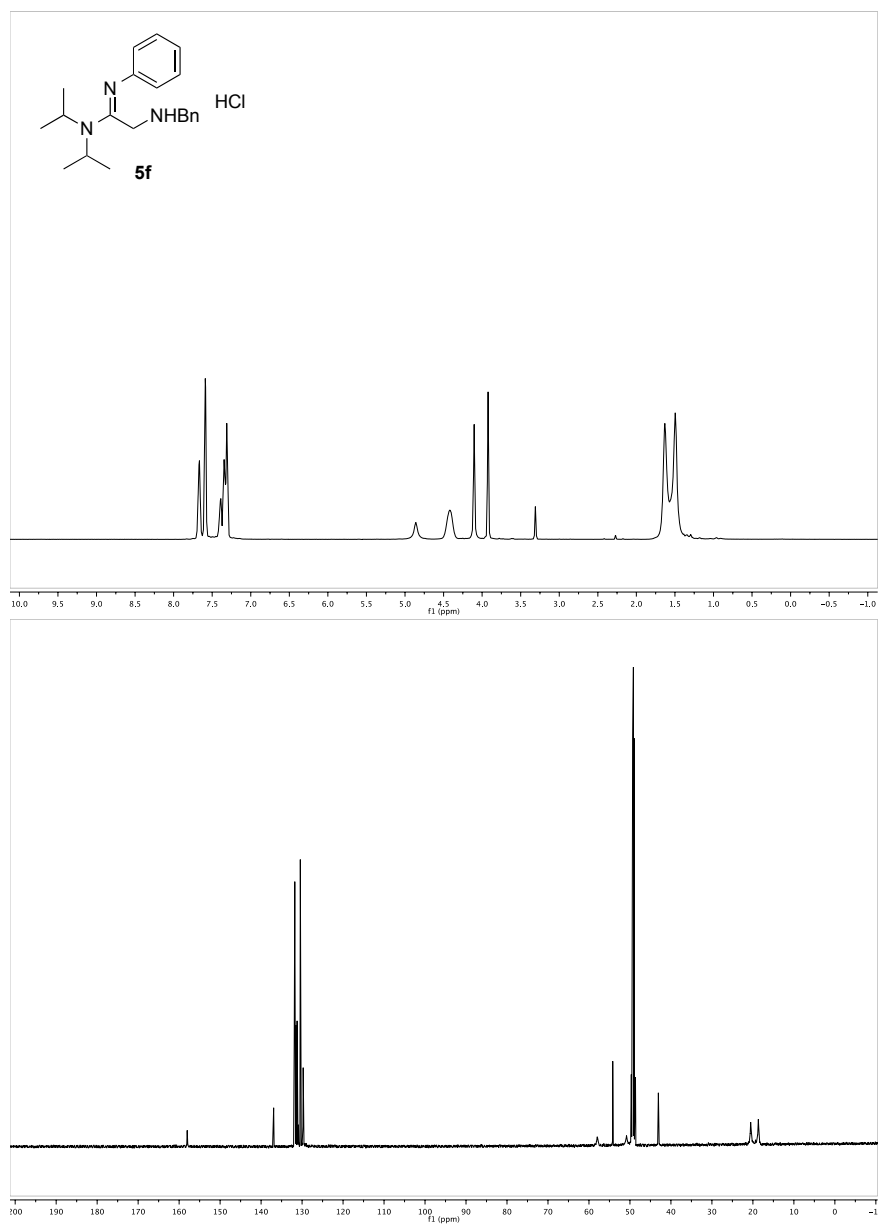

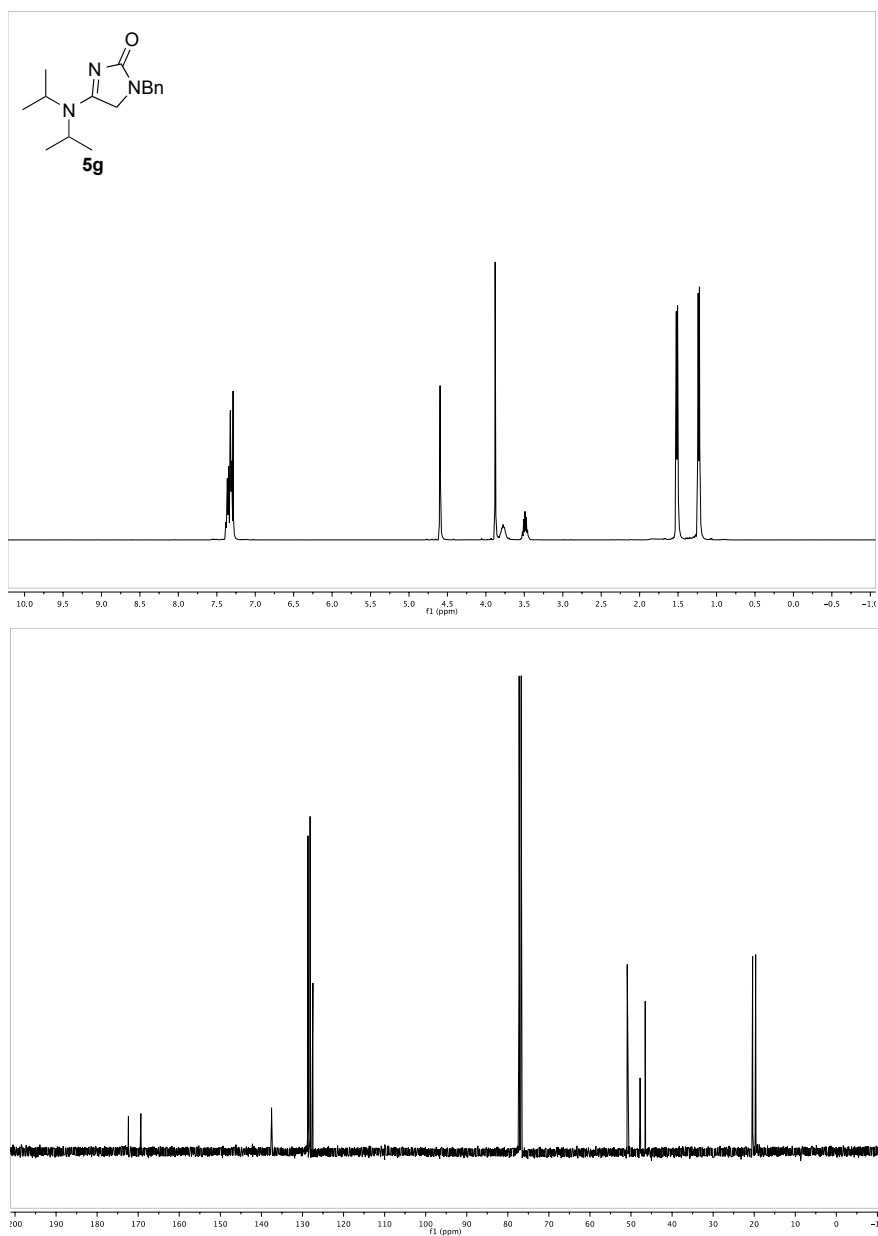

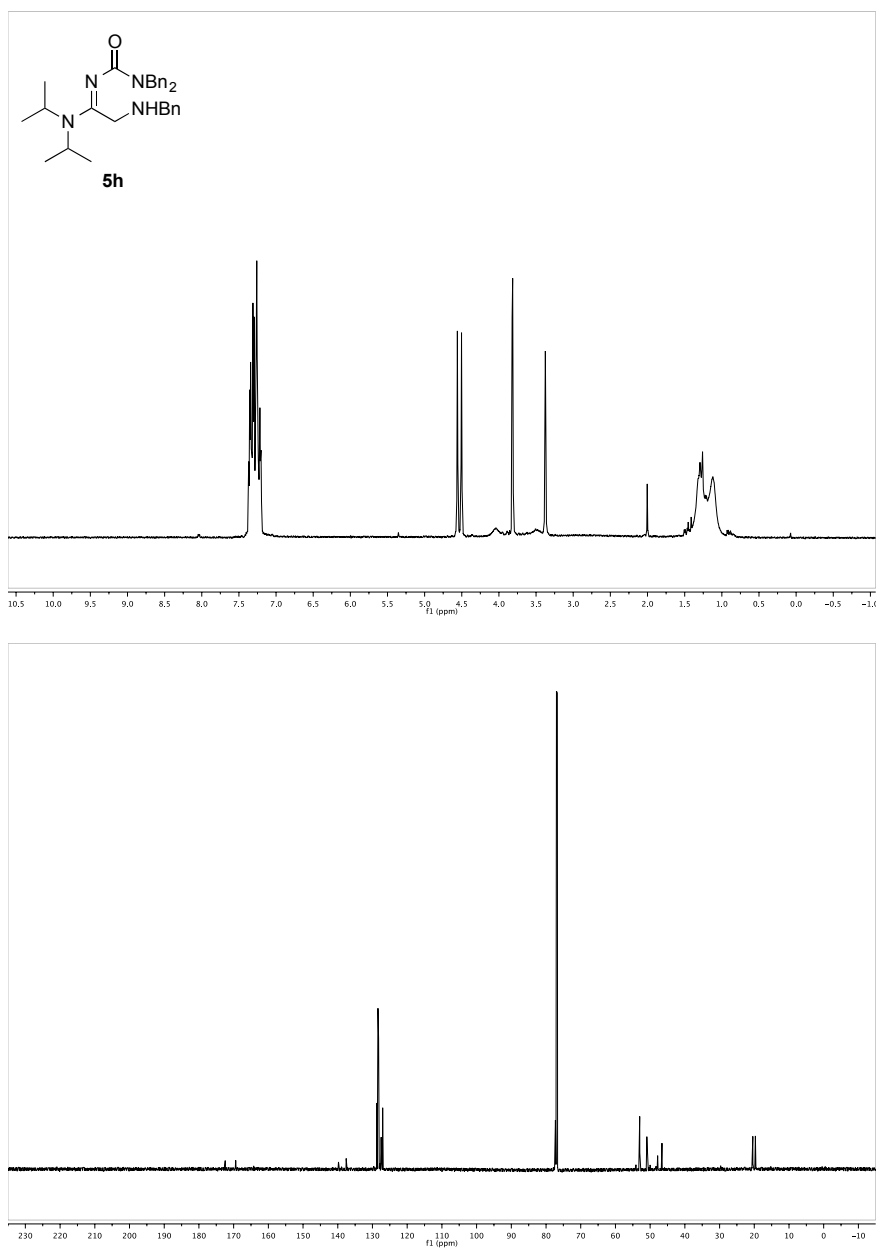

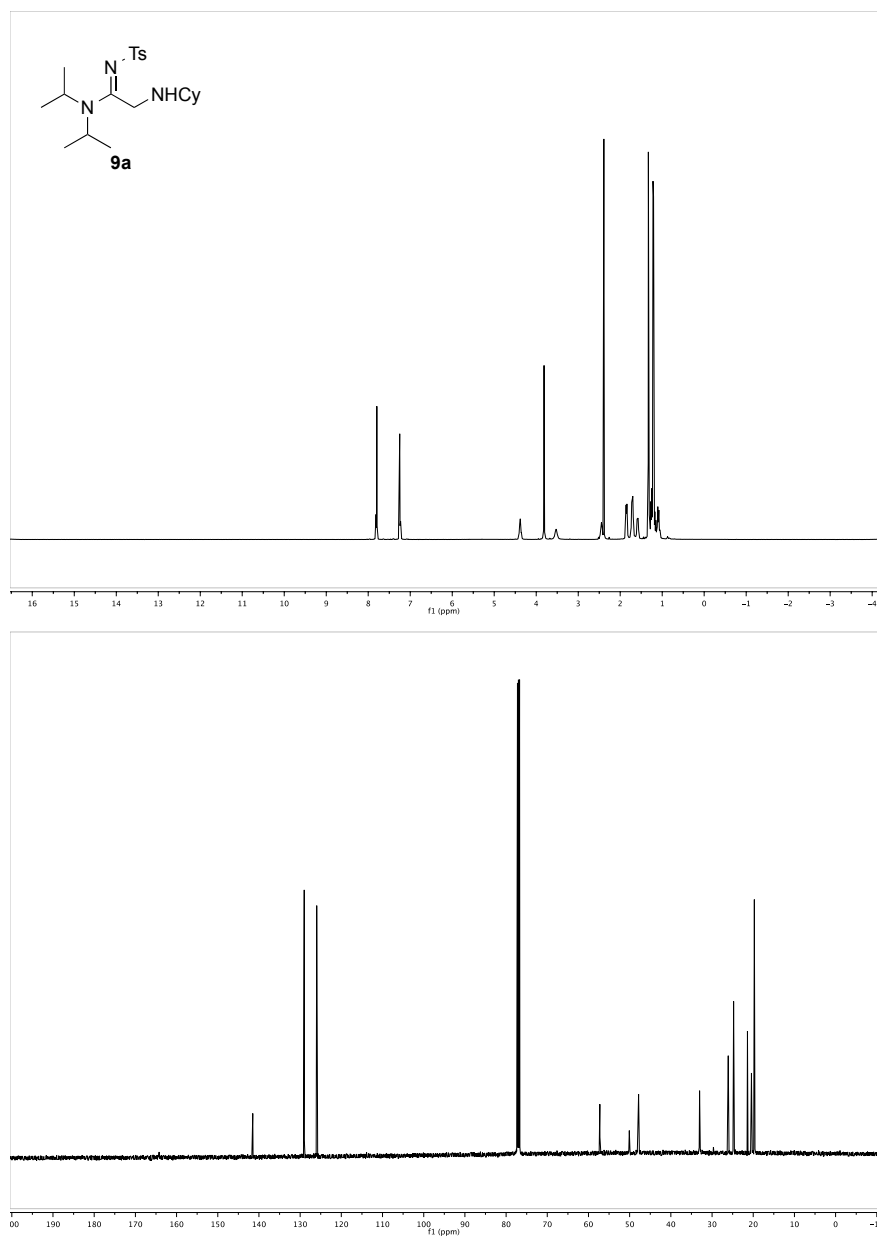

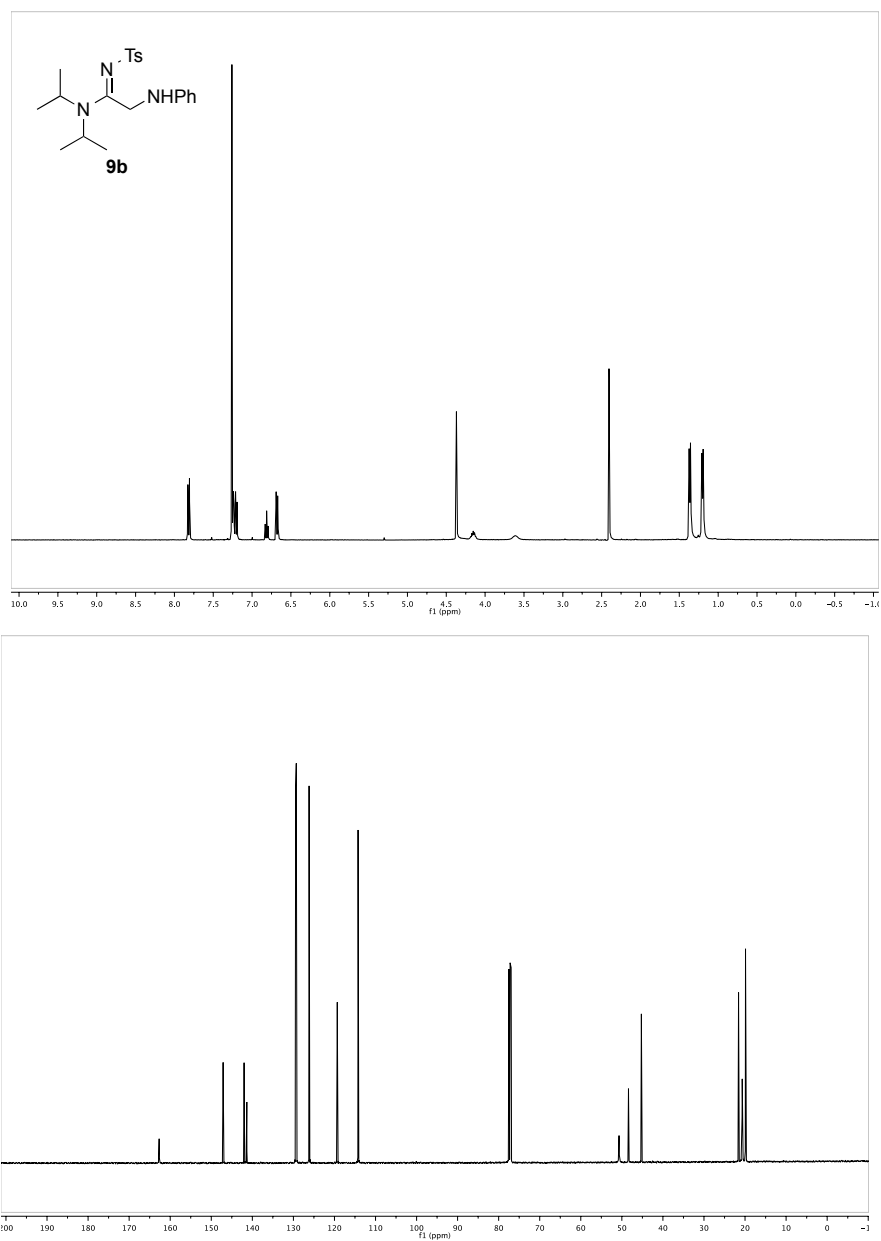

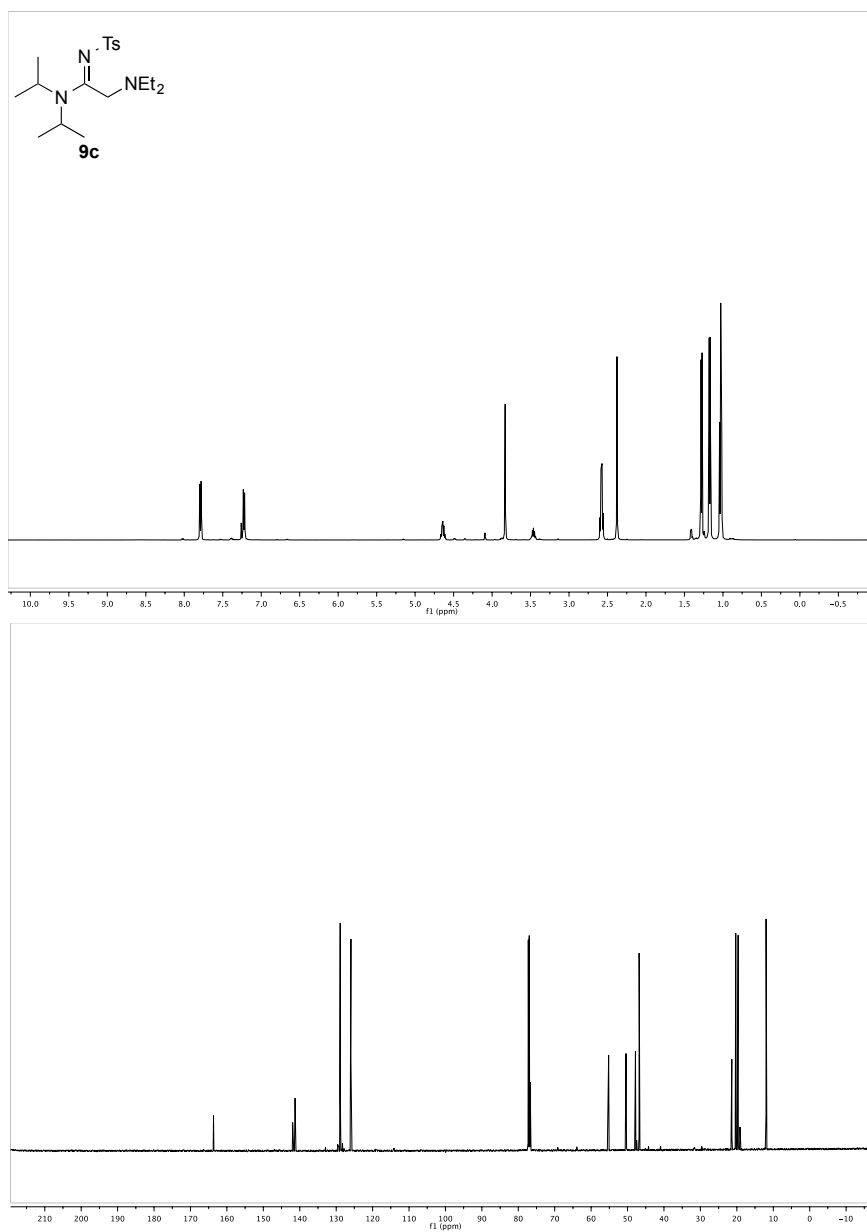

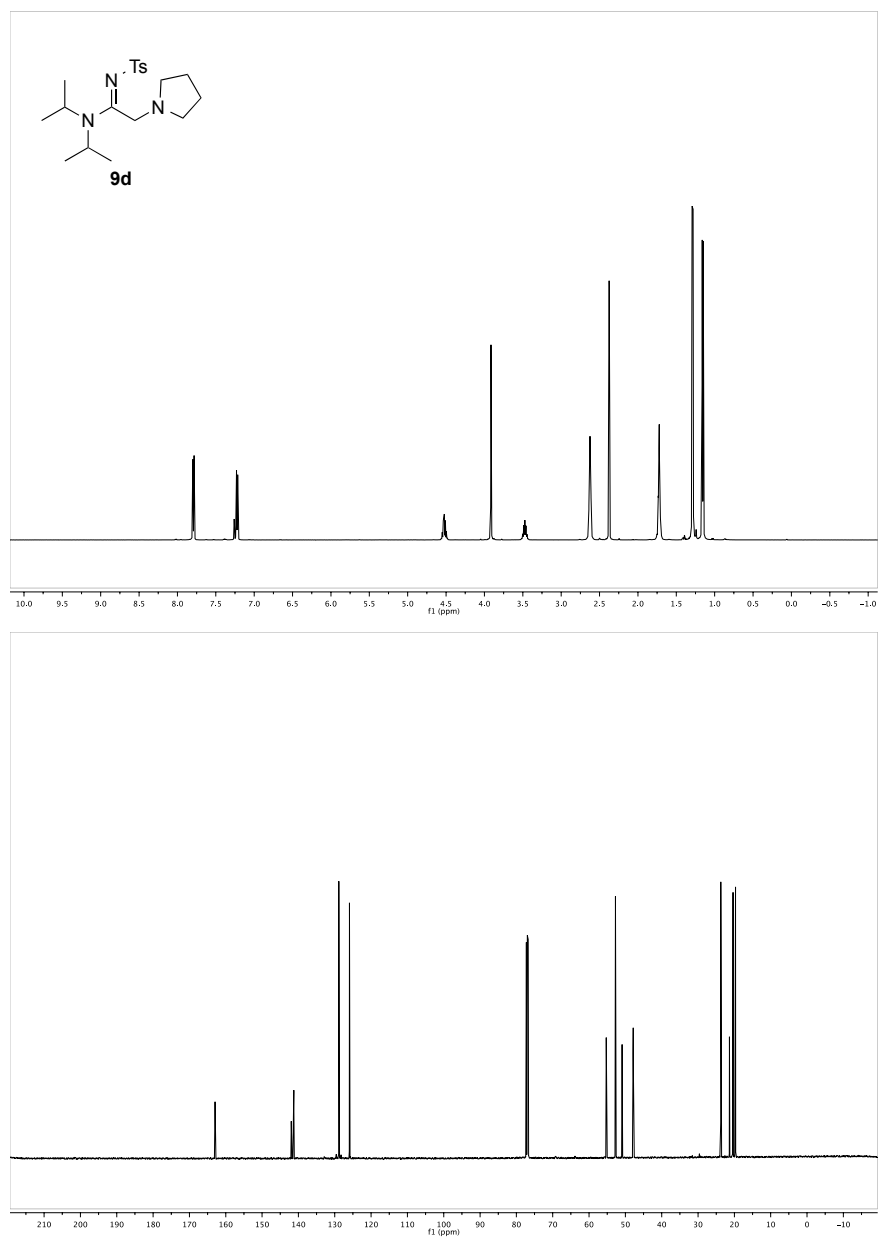

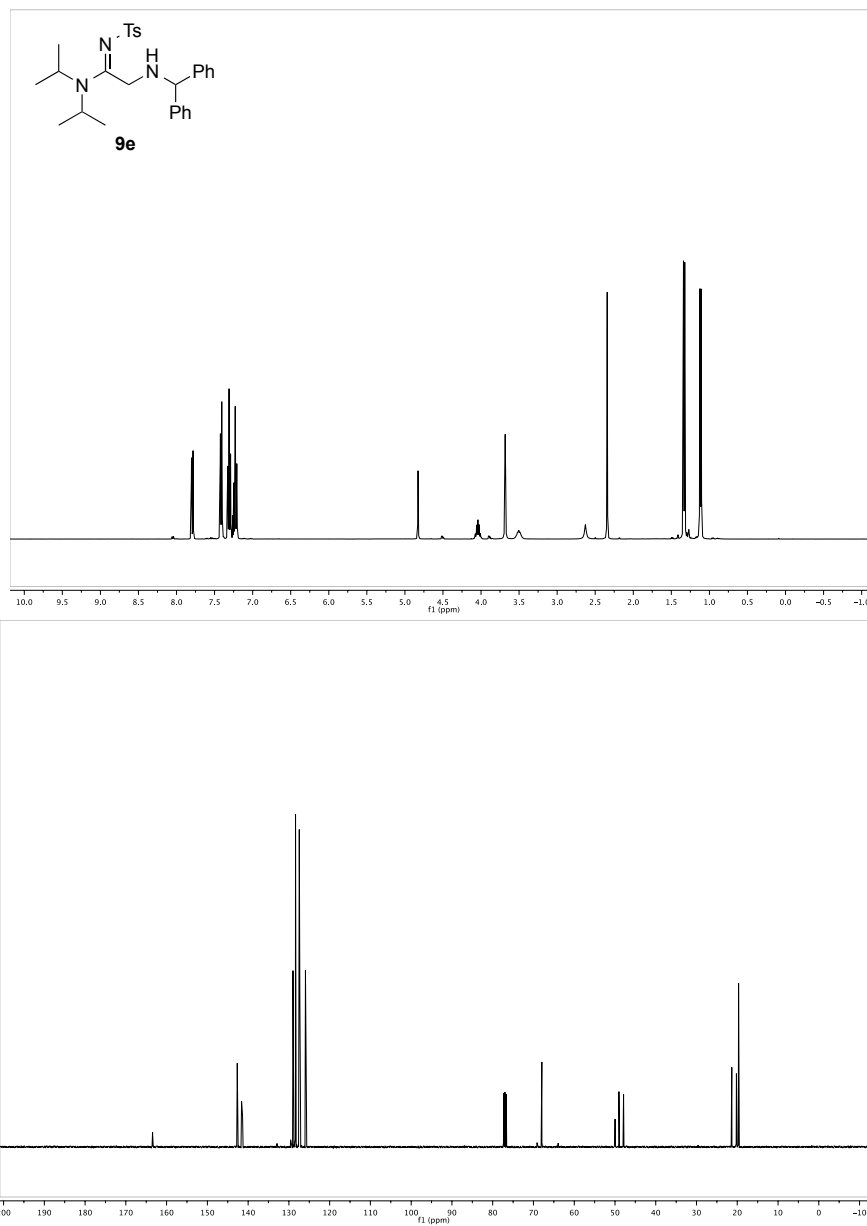

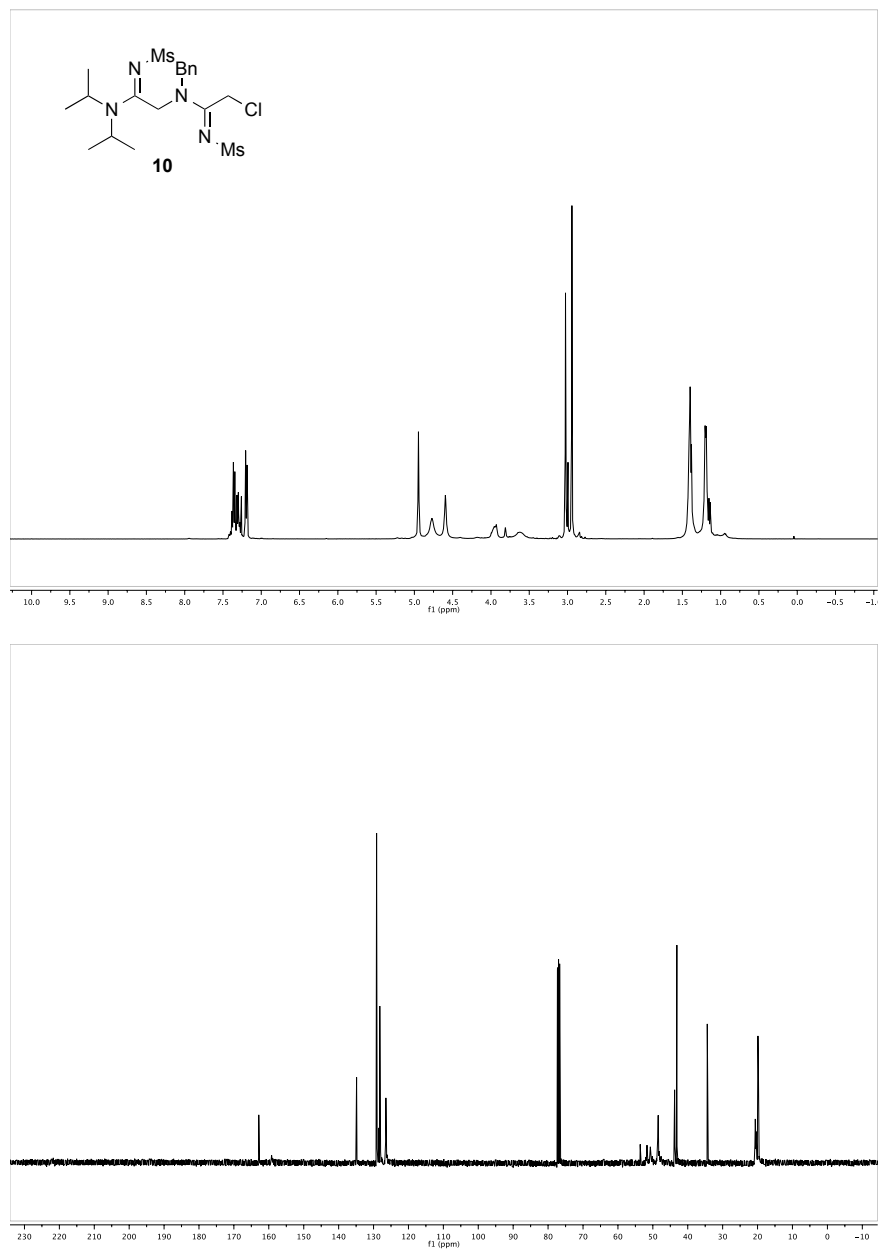





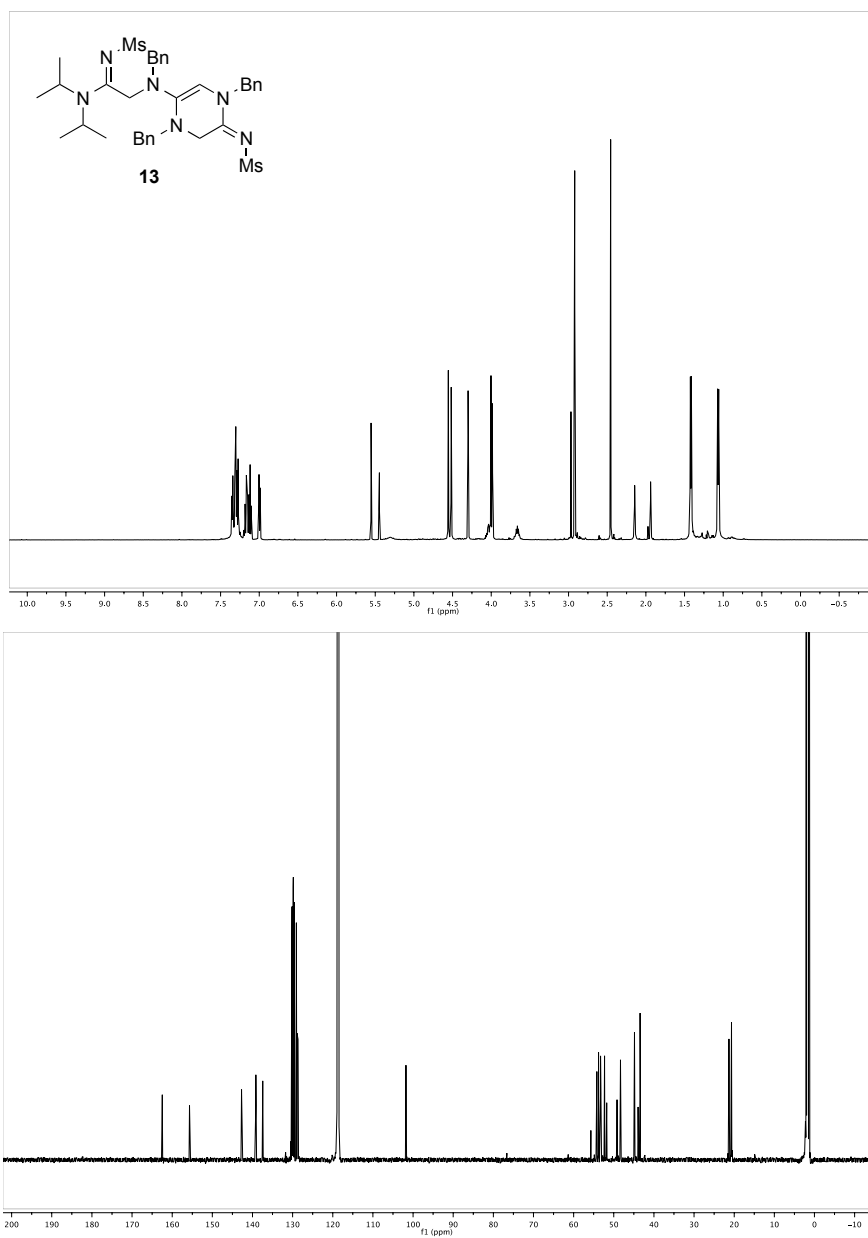

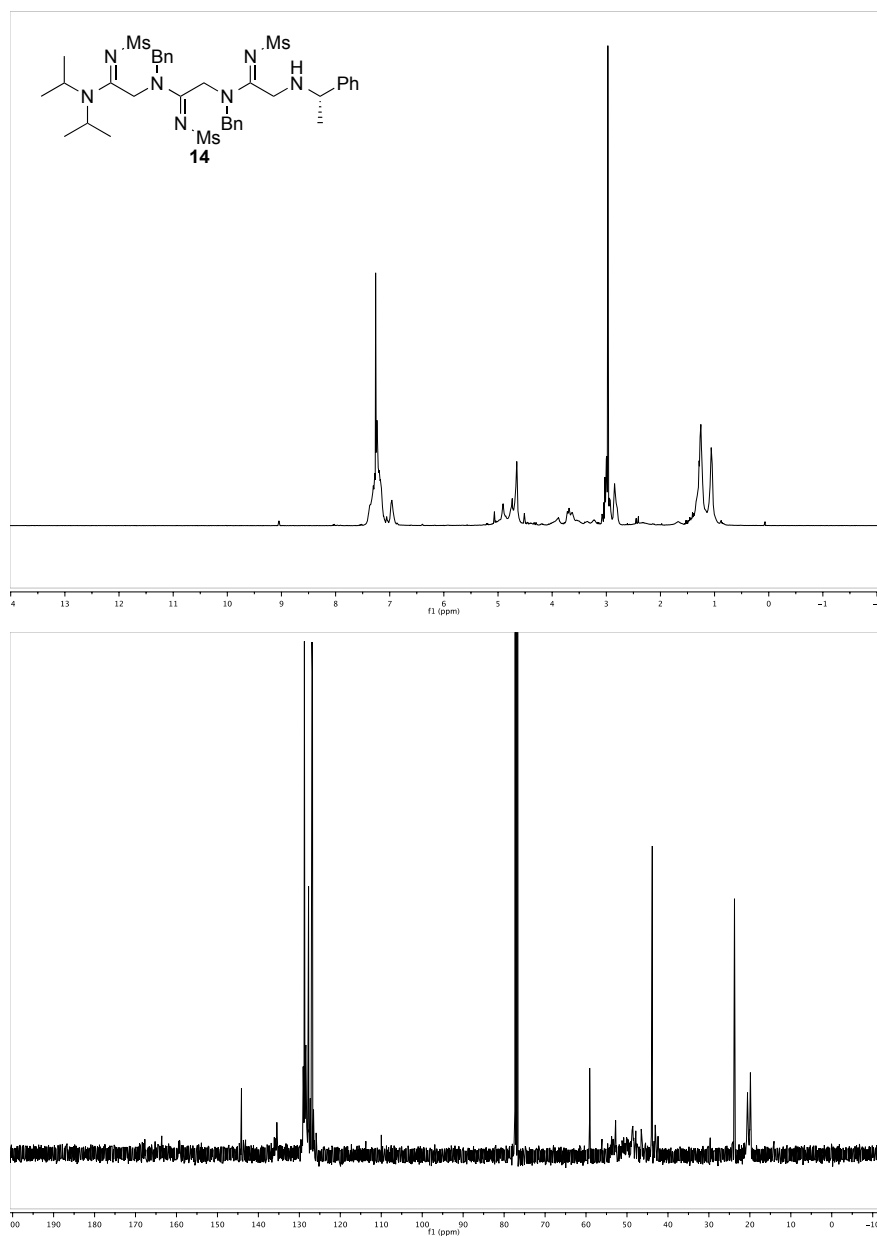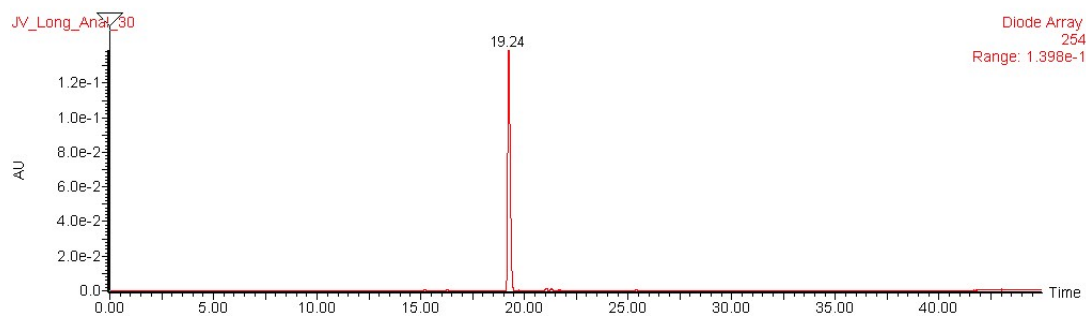

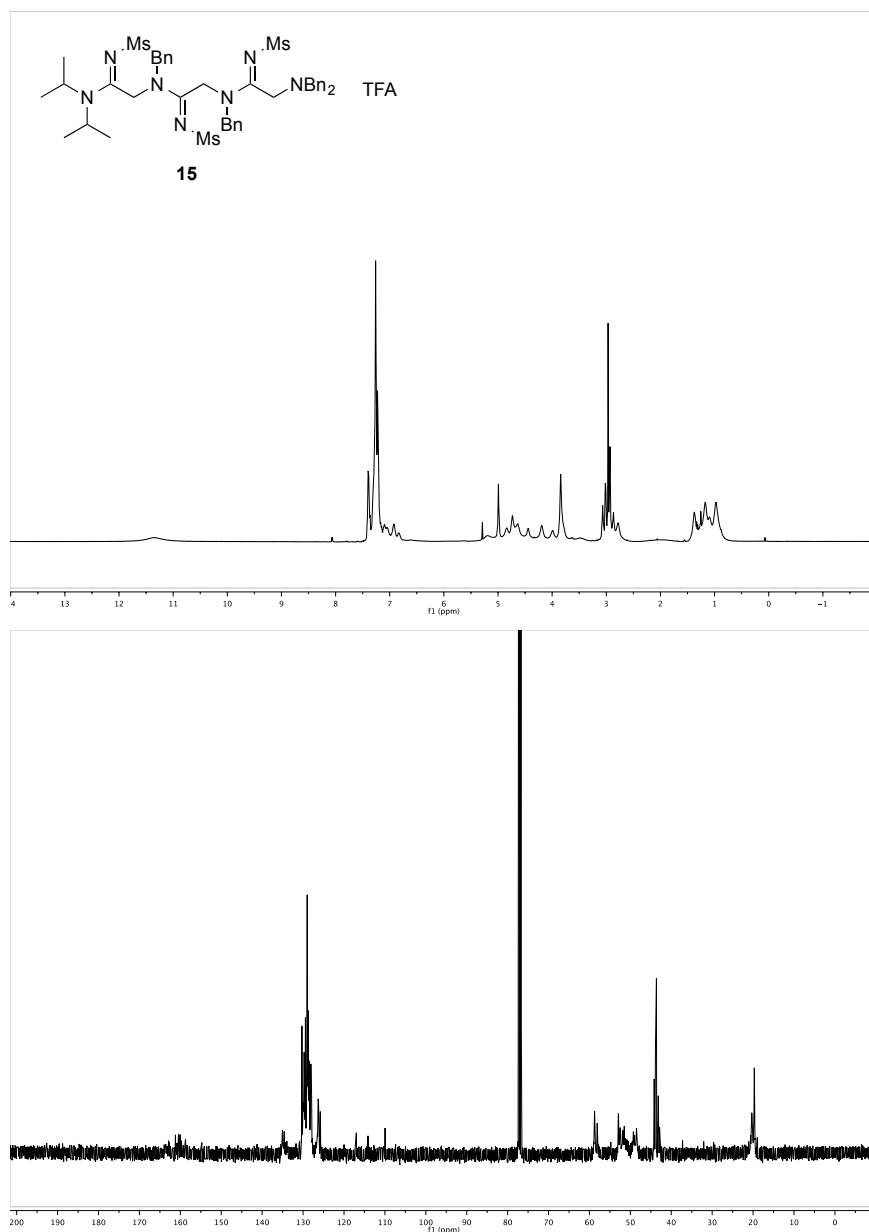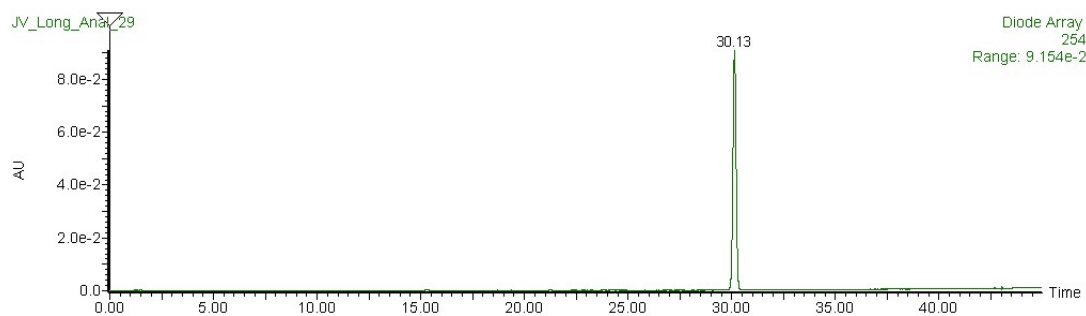

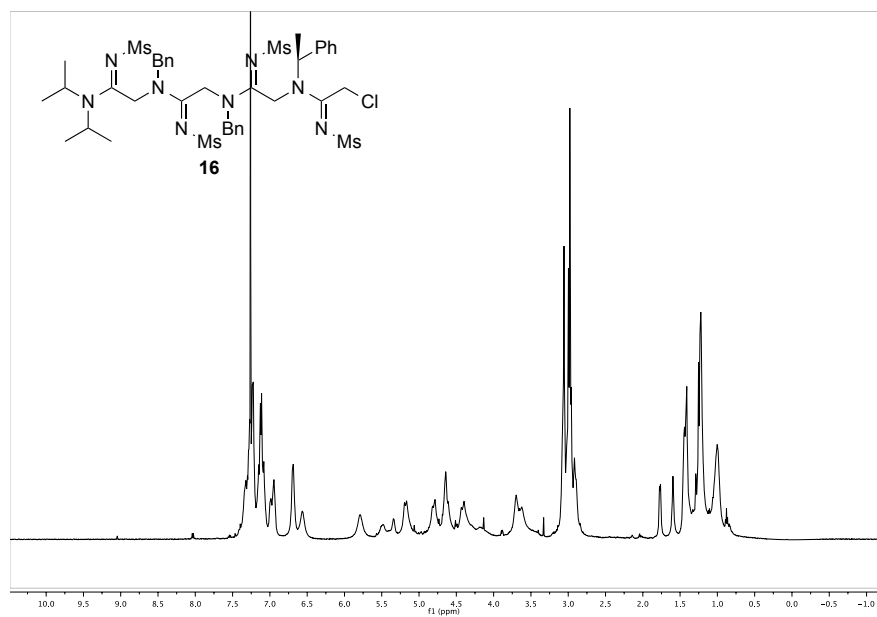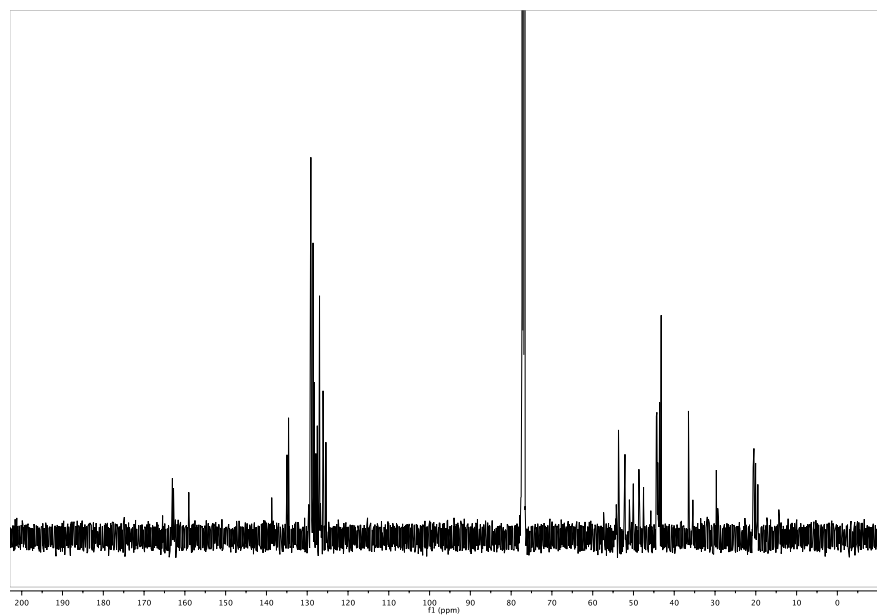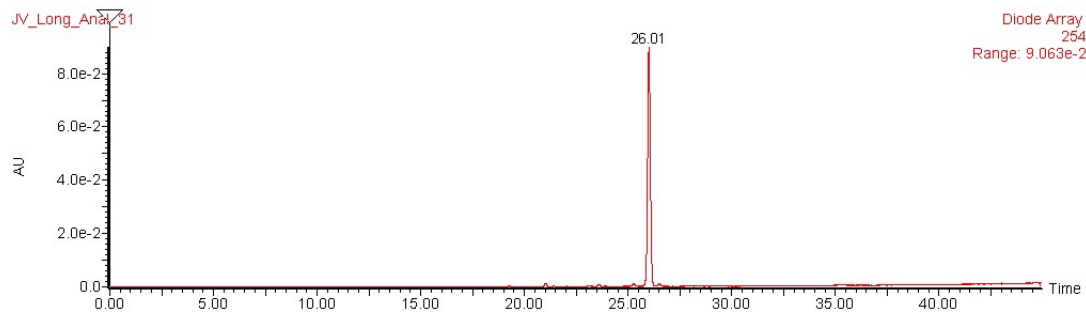

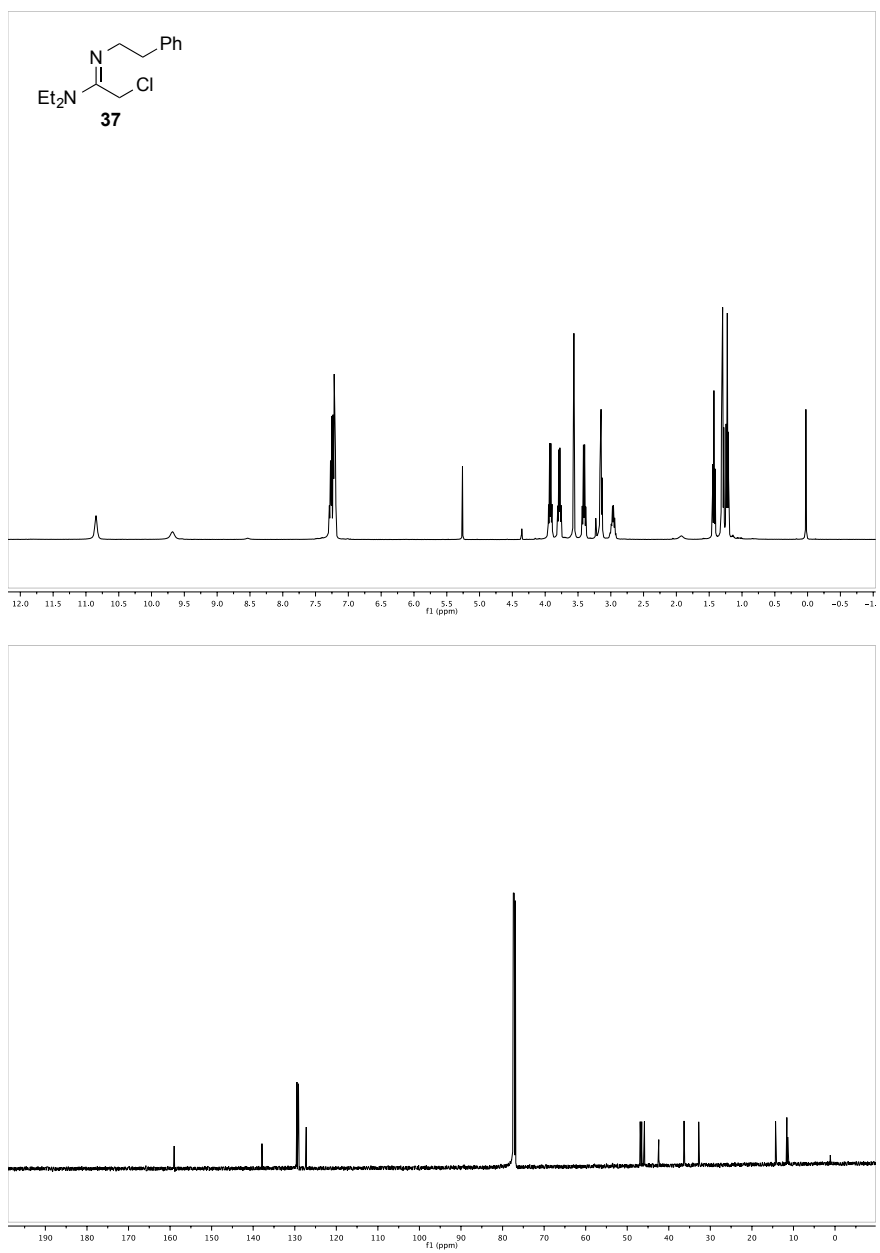

## Solid Phase

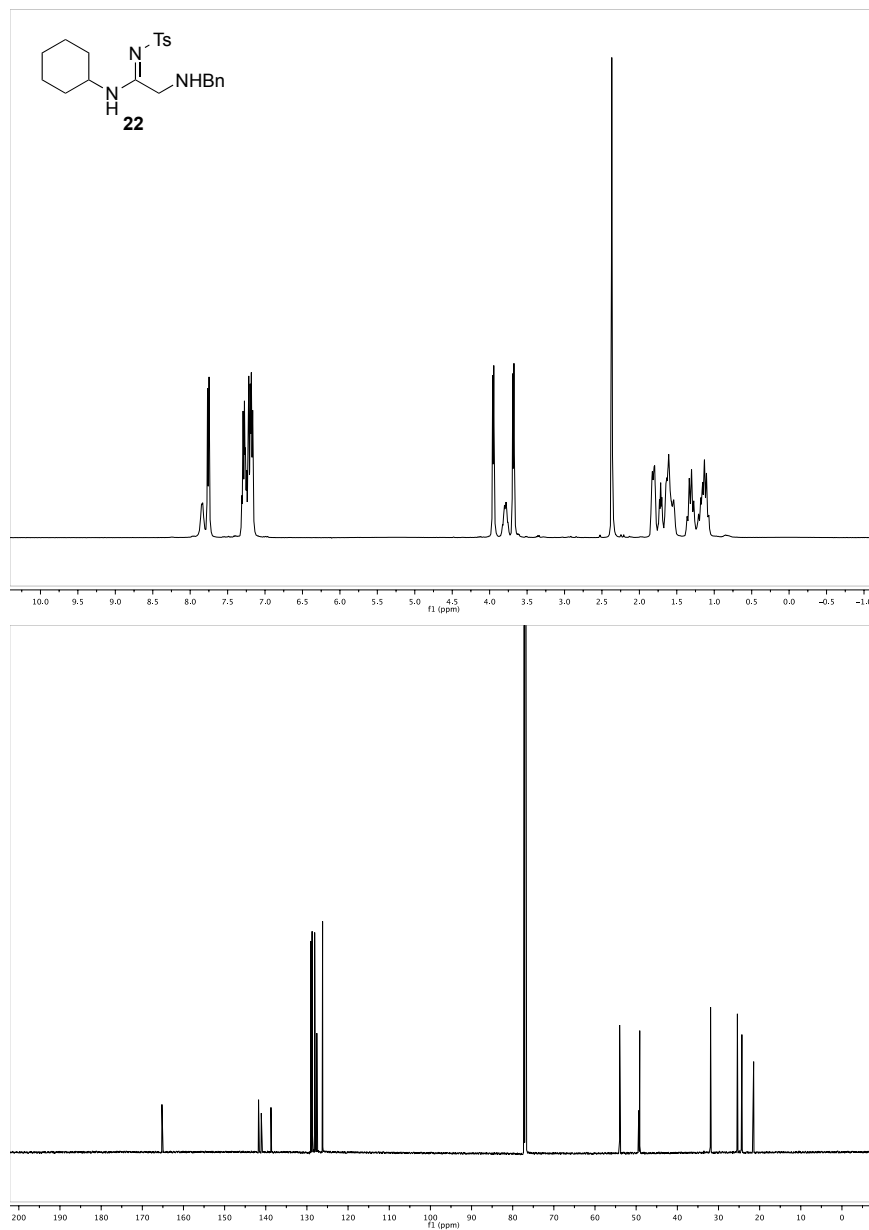

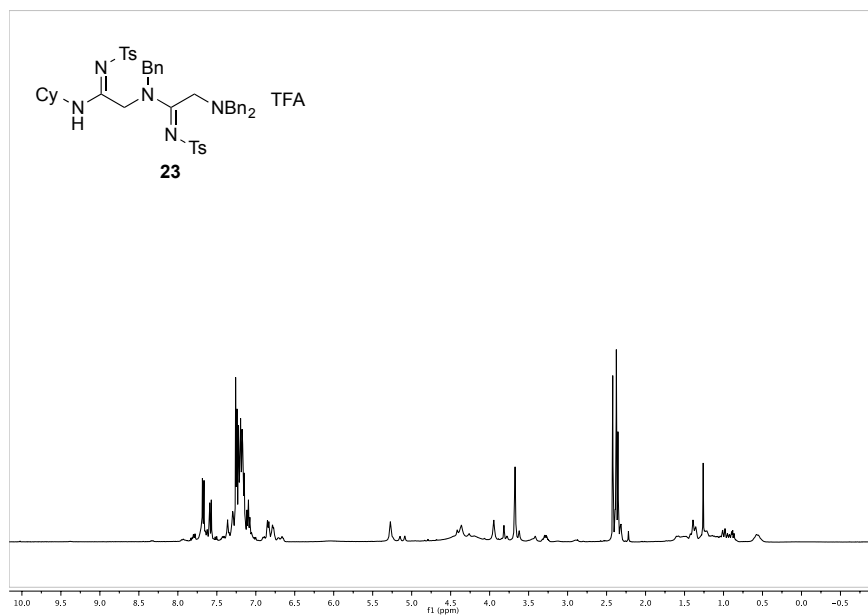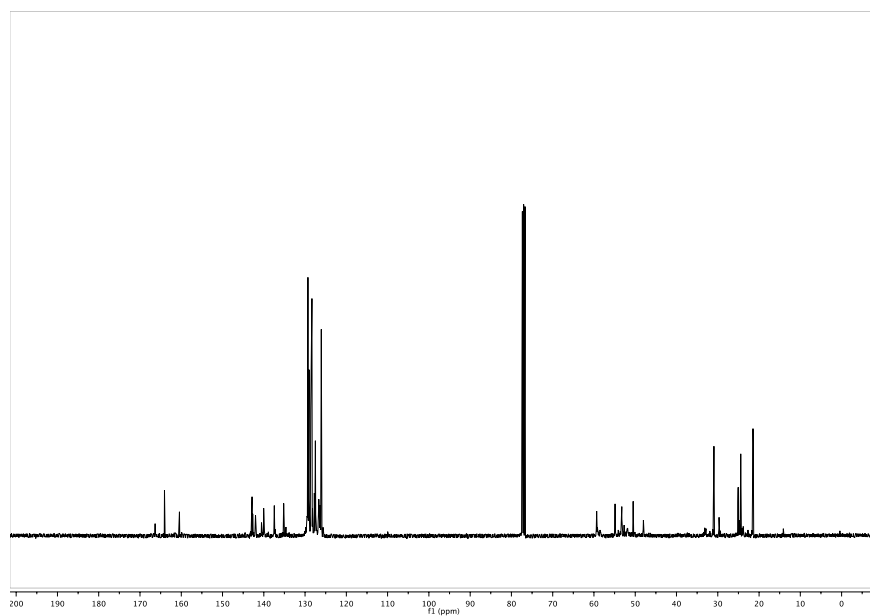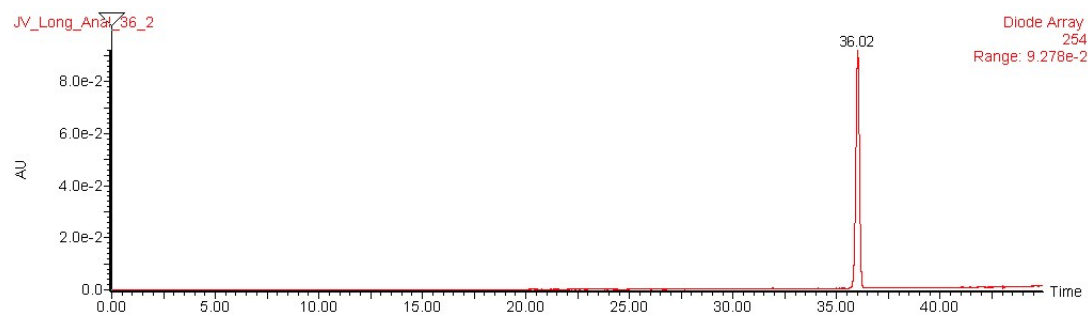

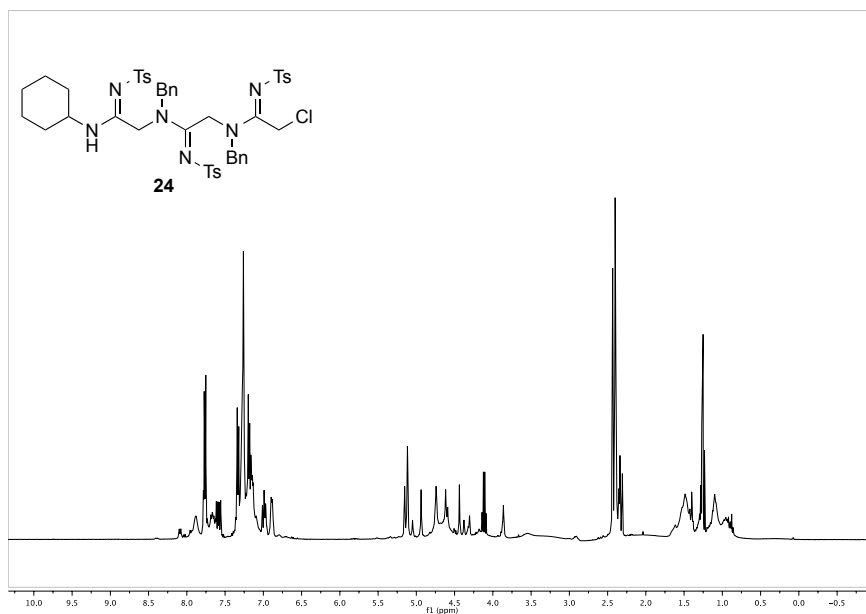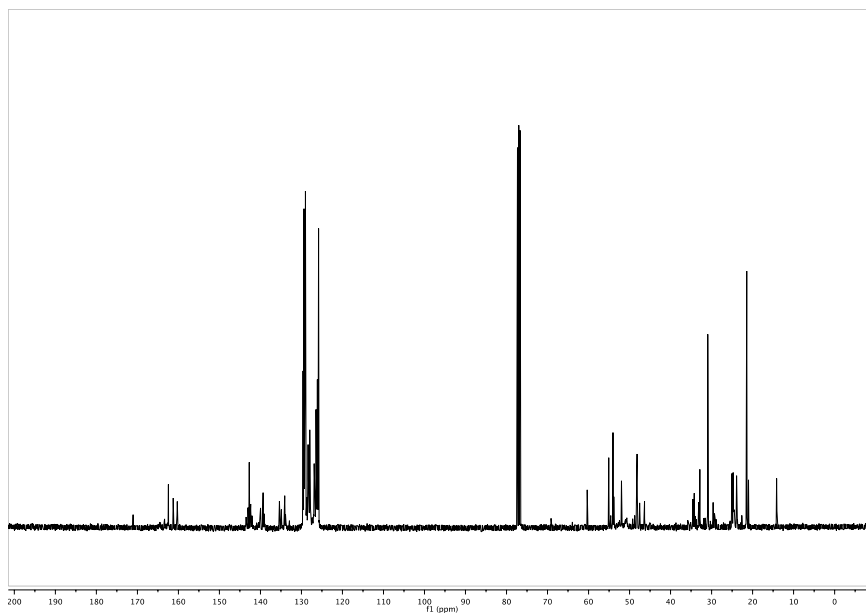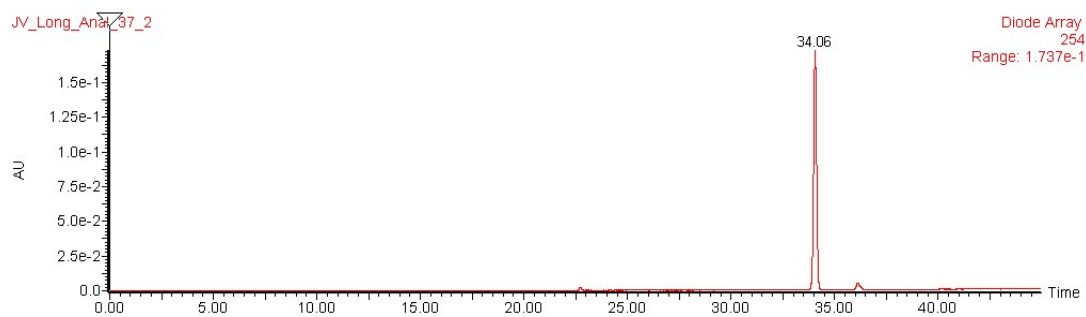

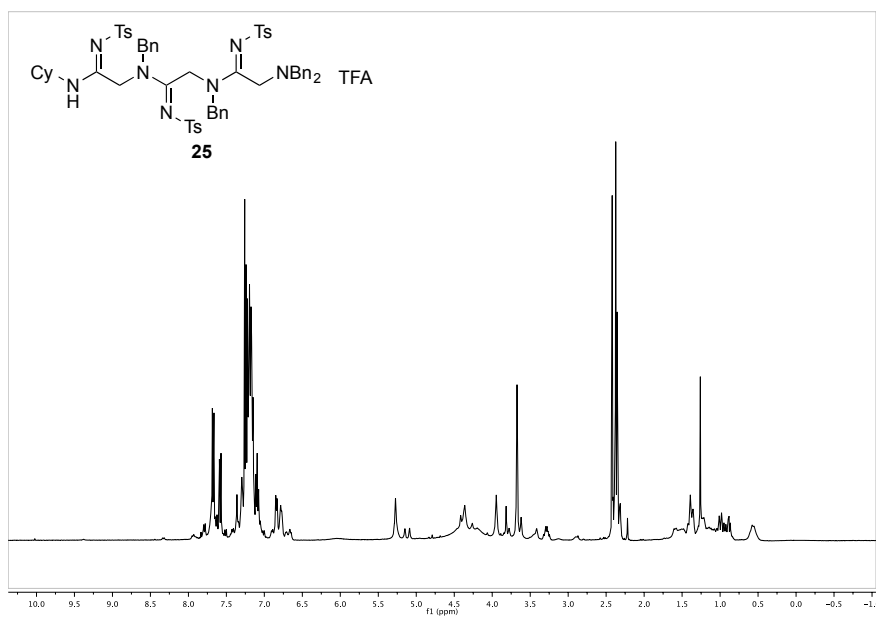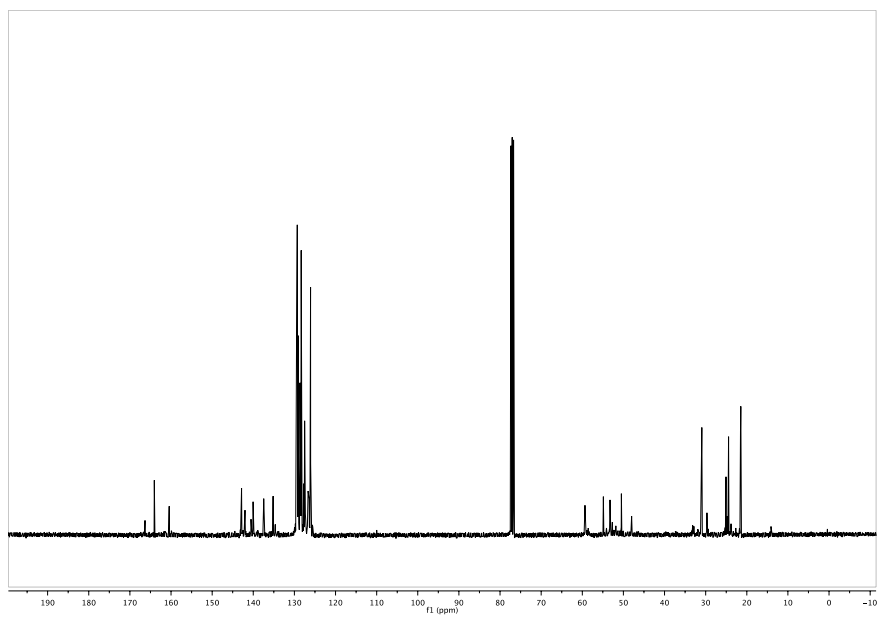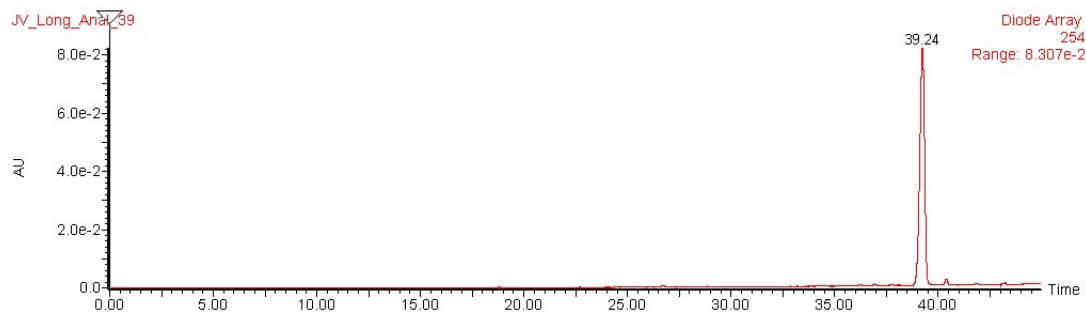

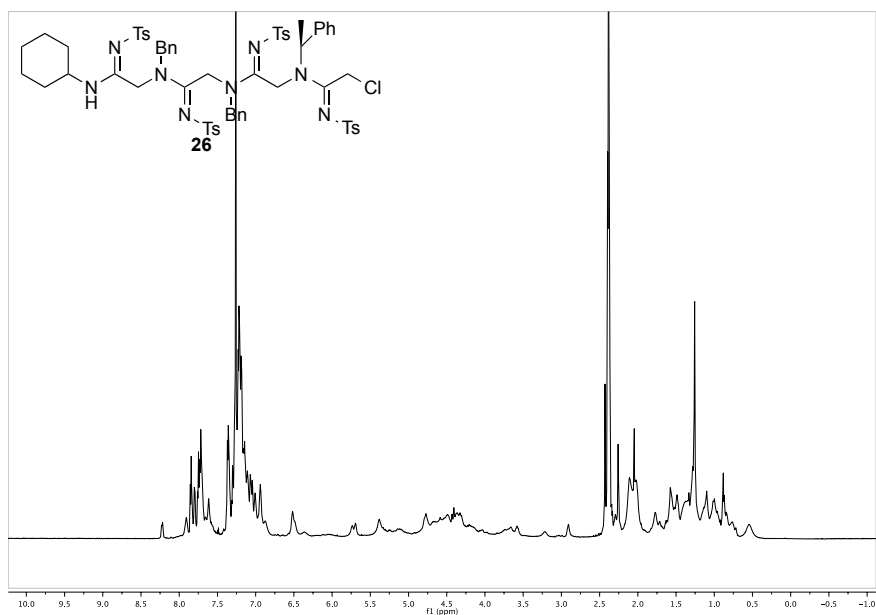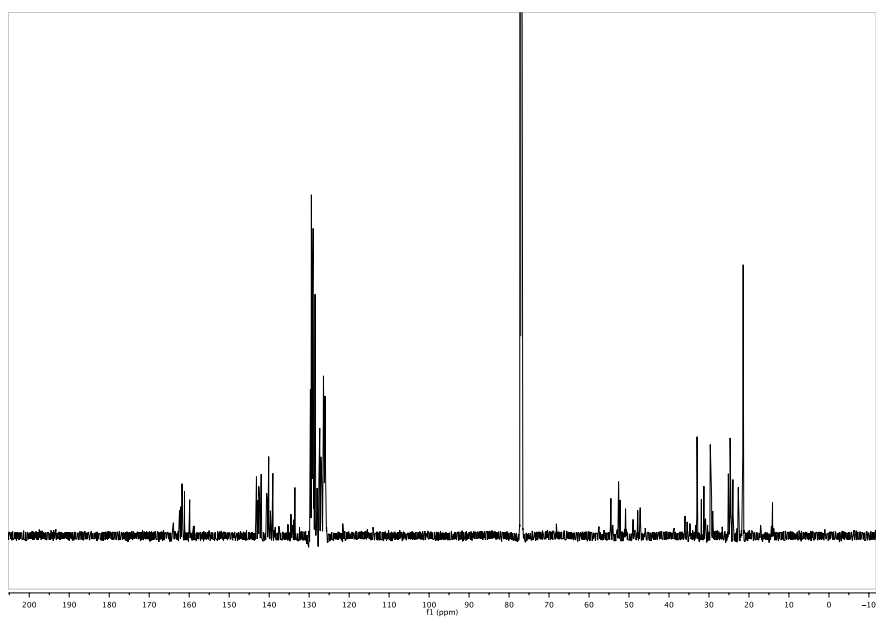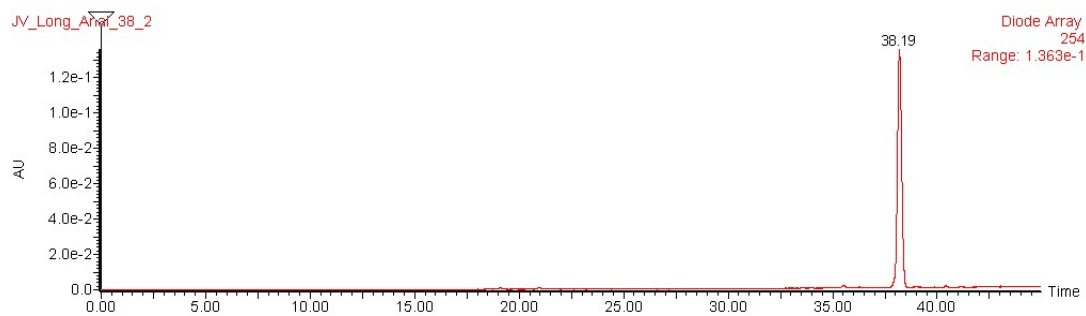

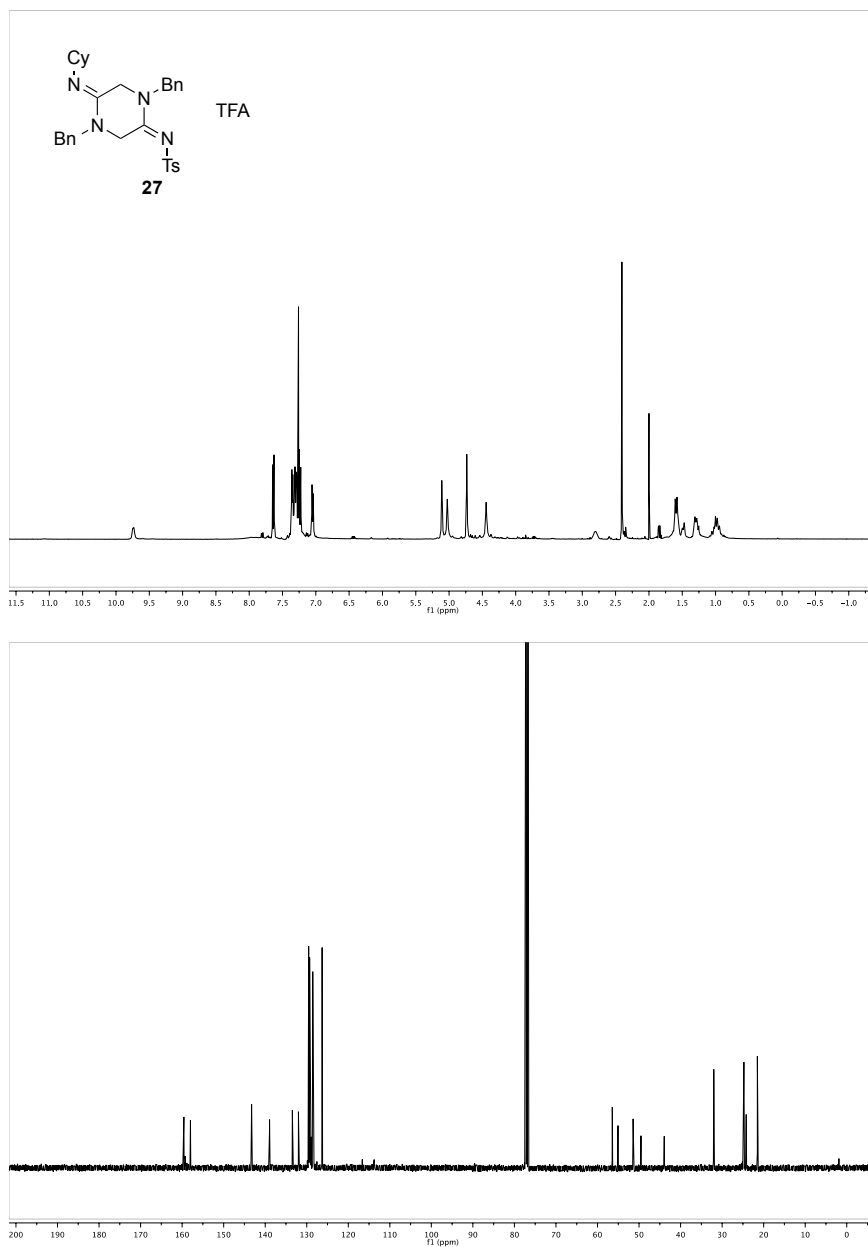

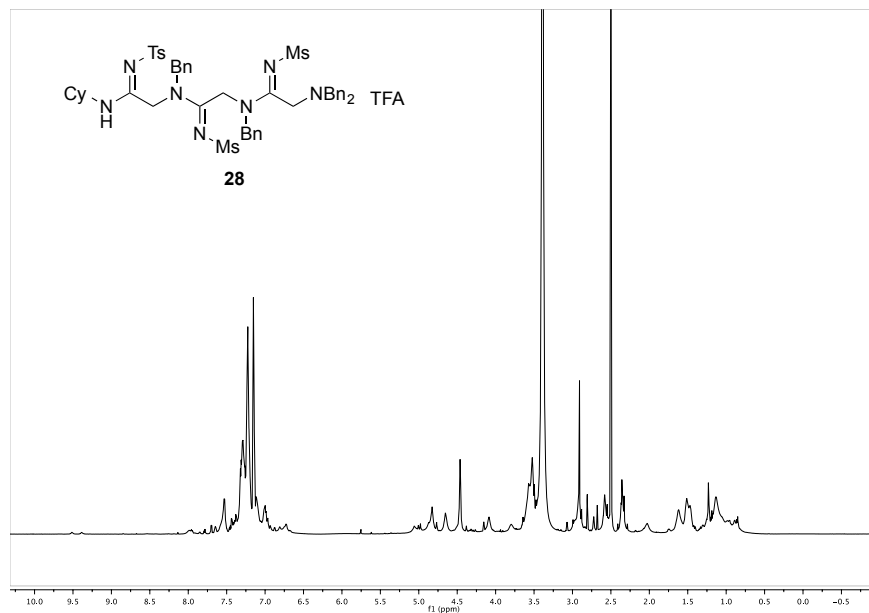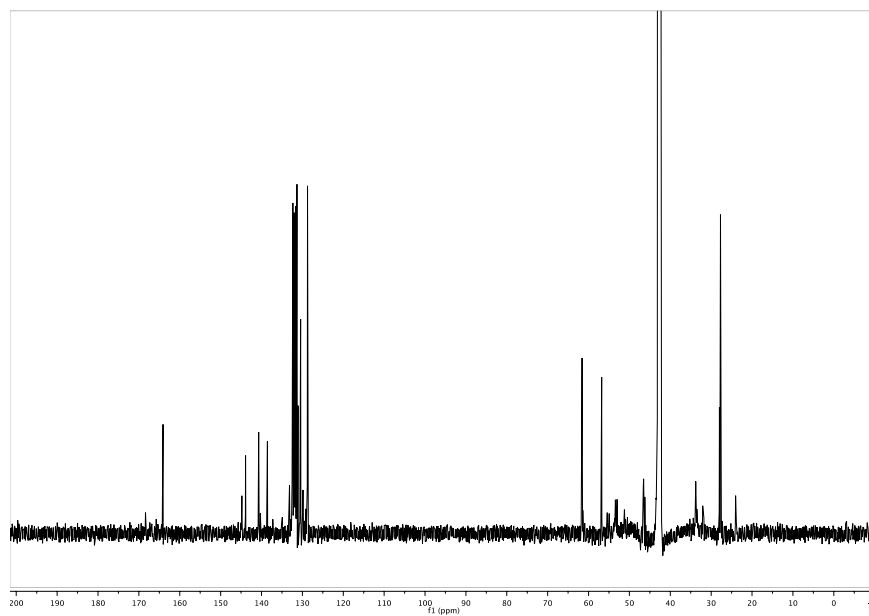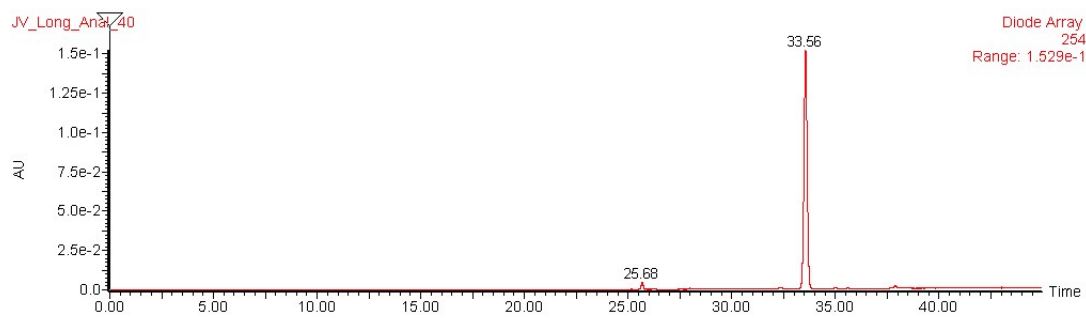

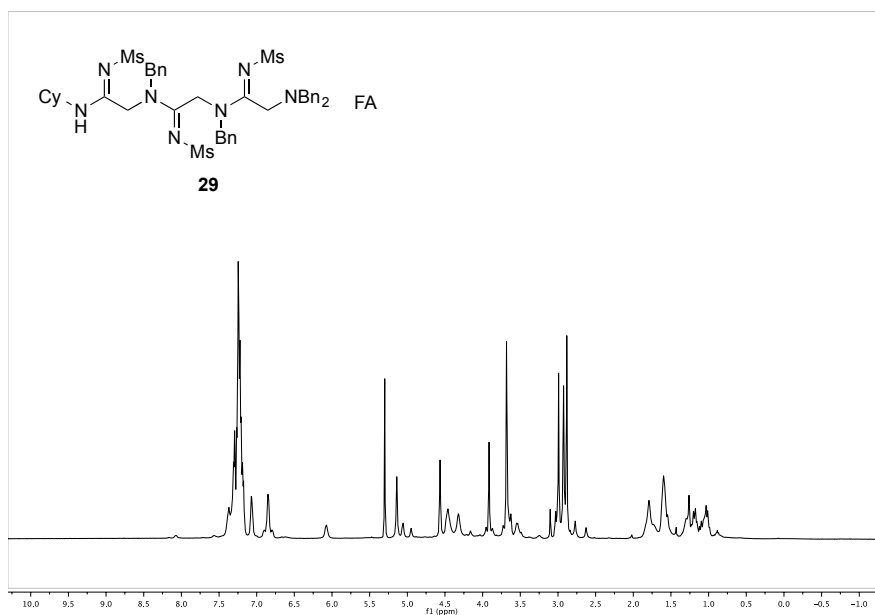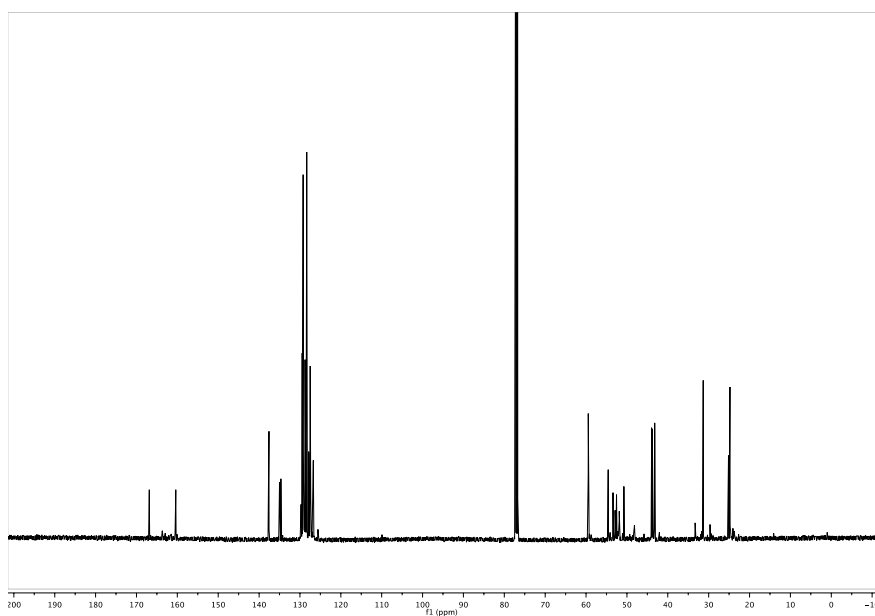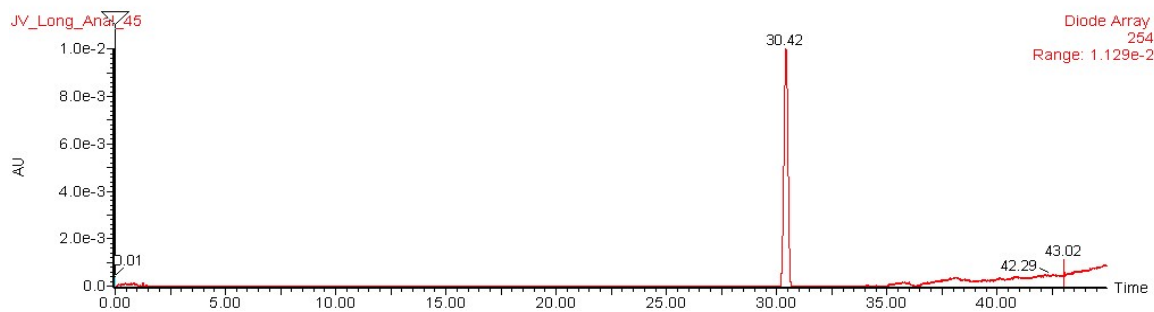

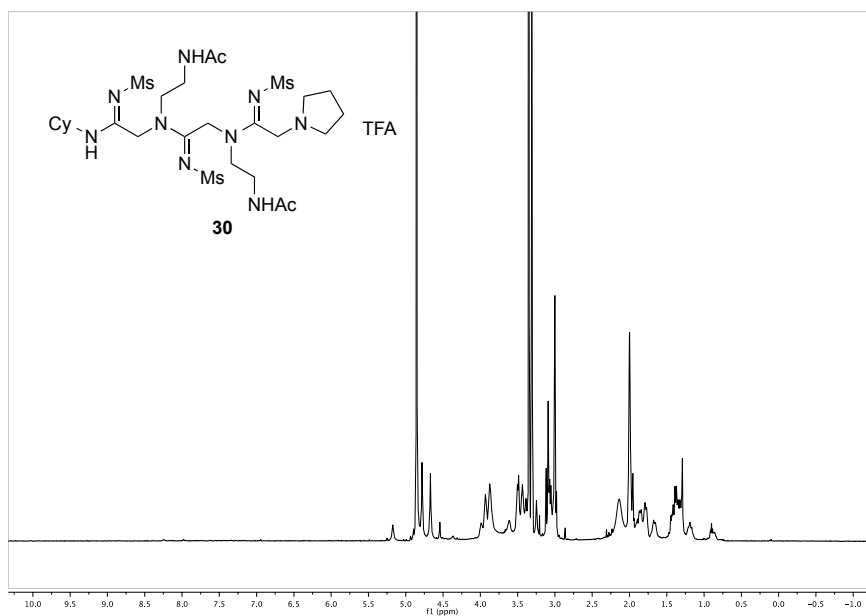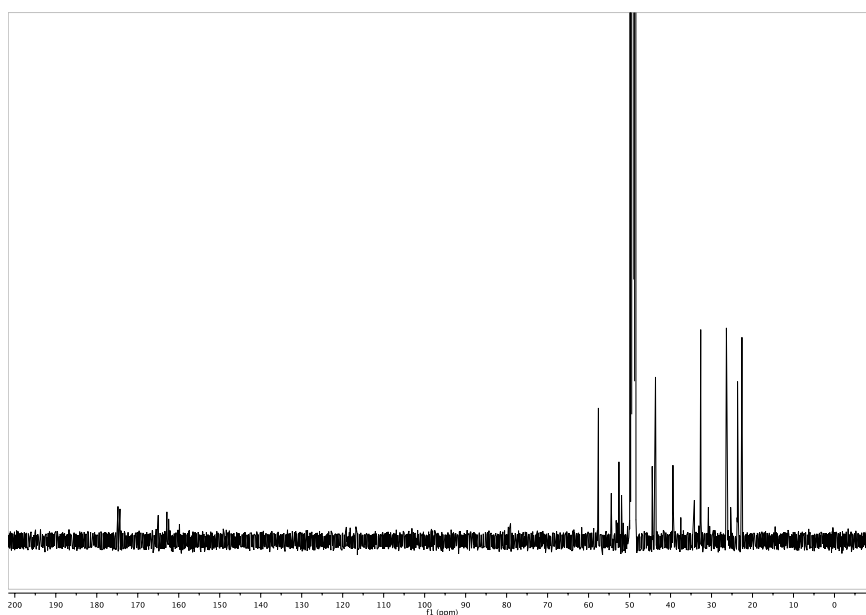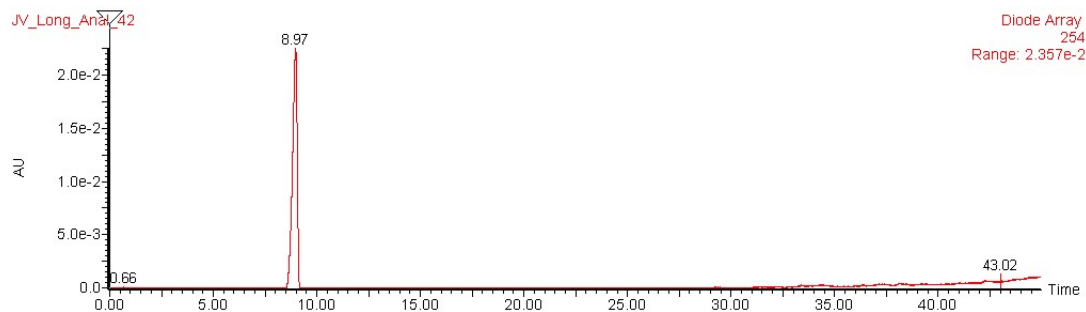

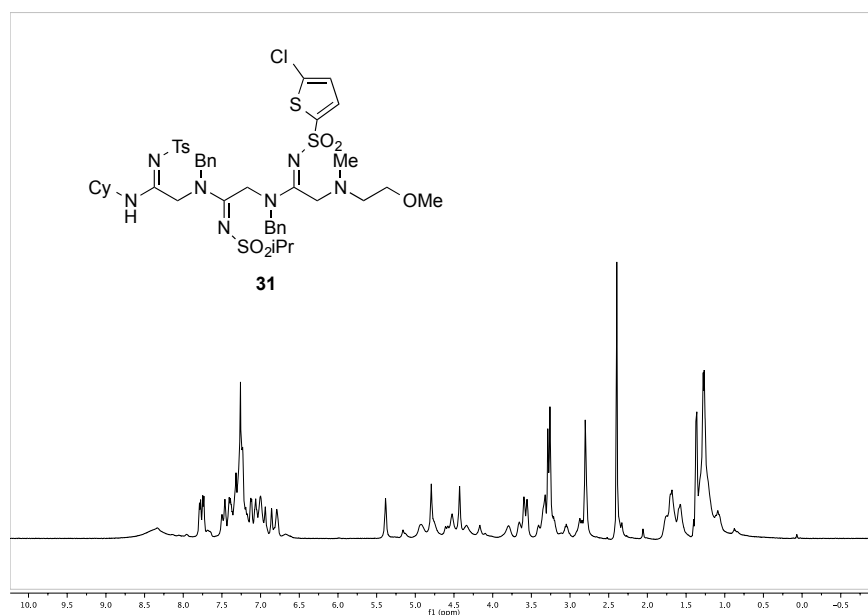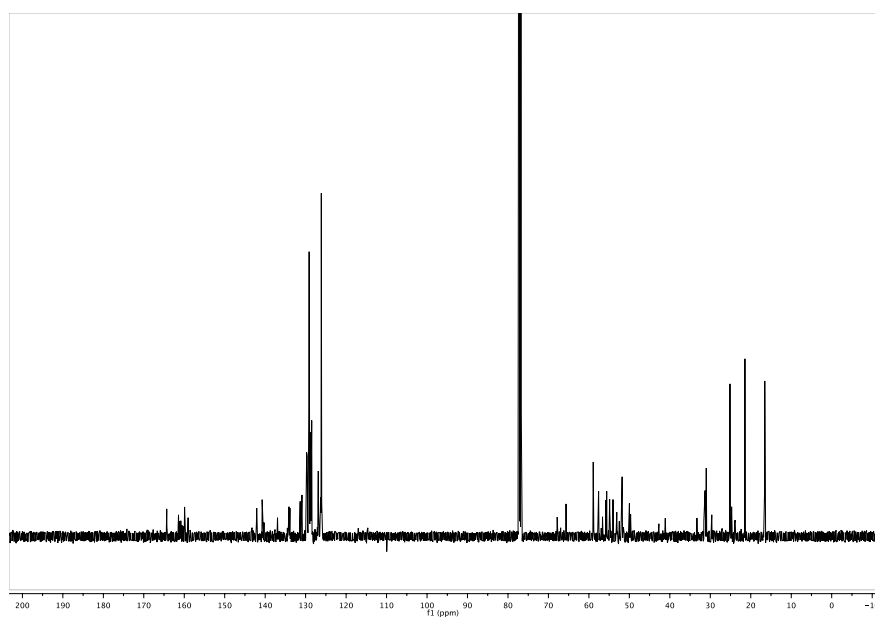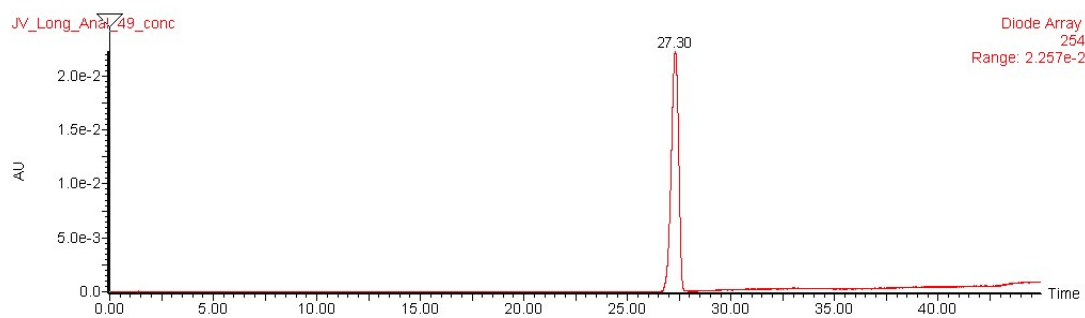

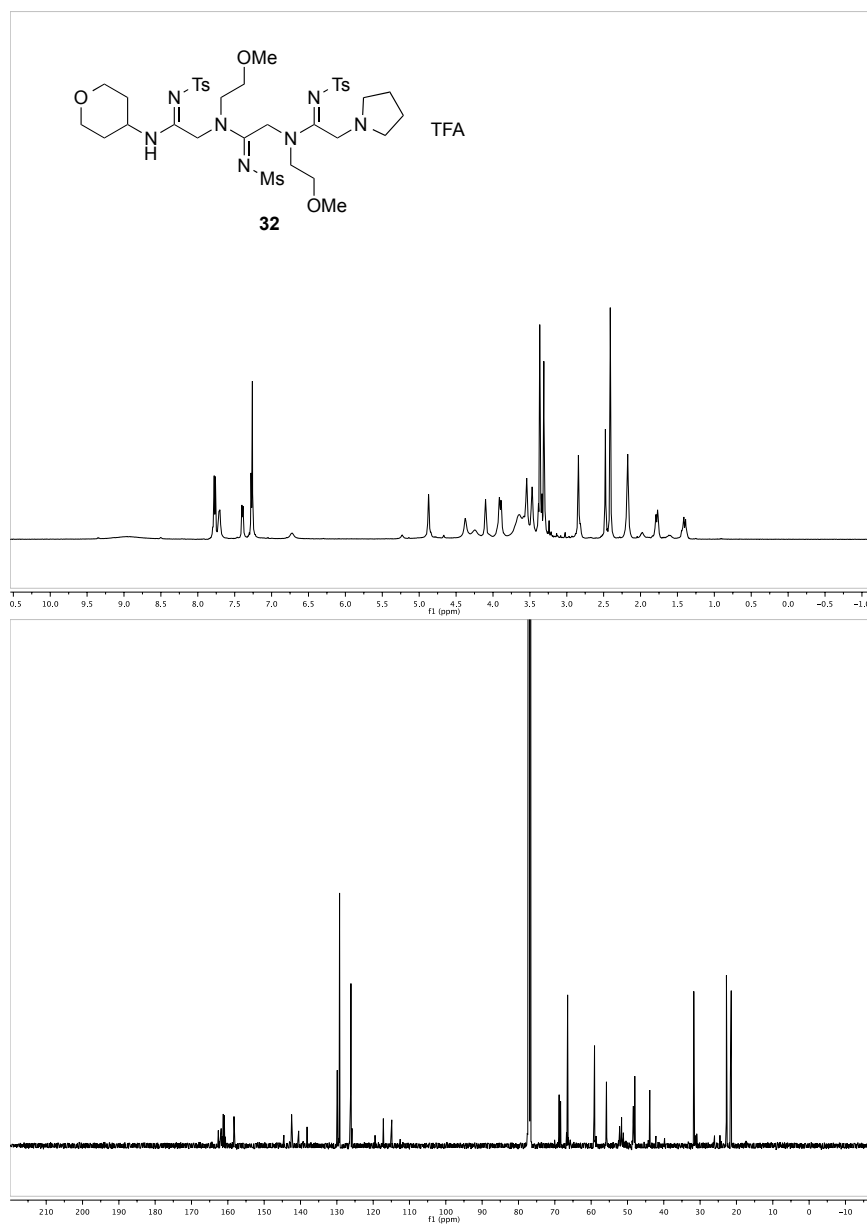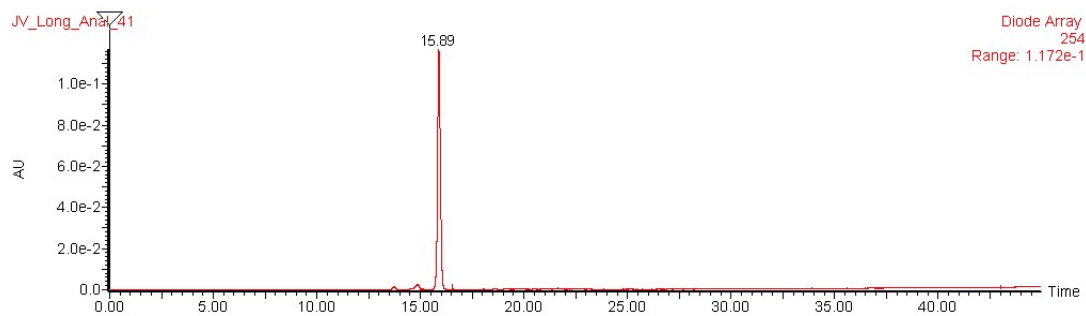

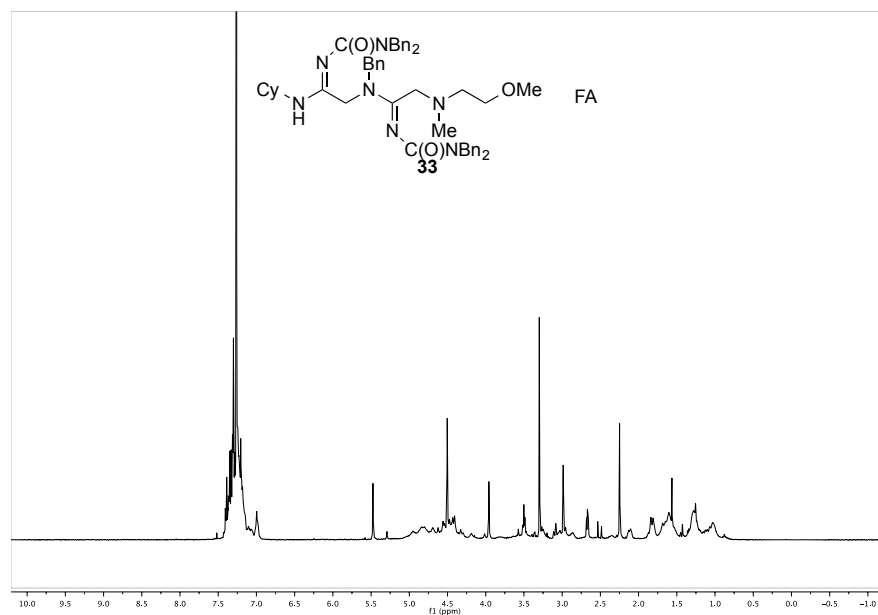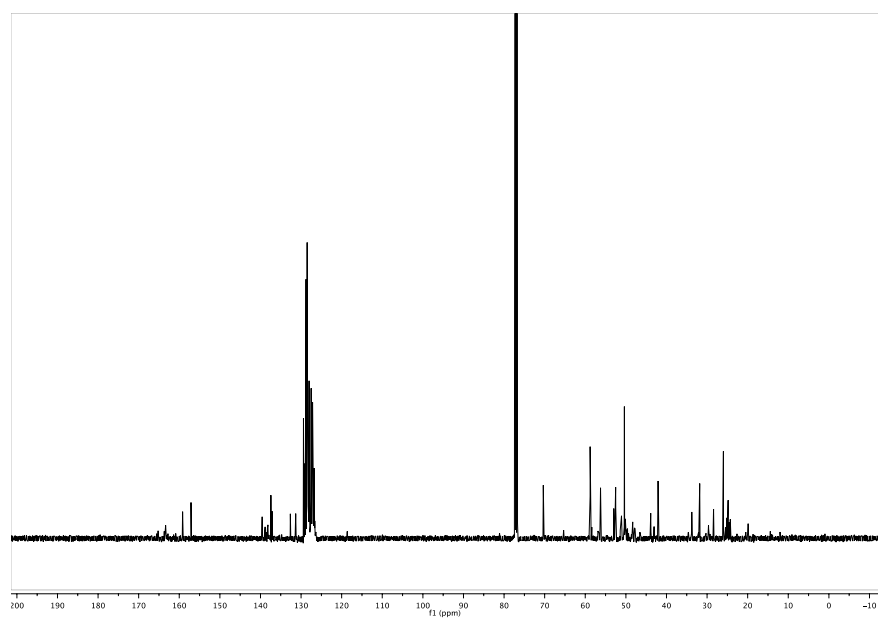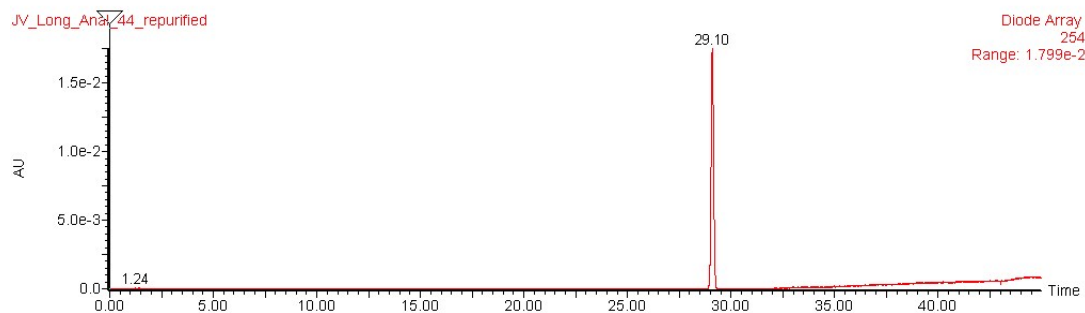

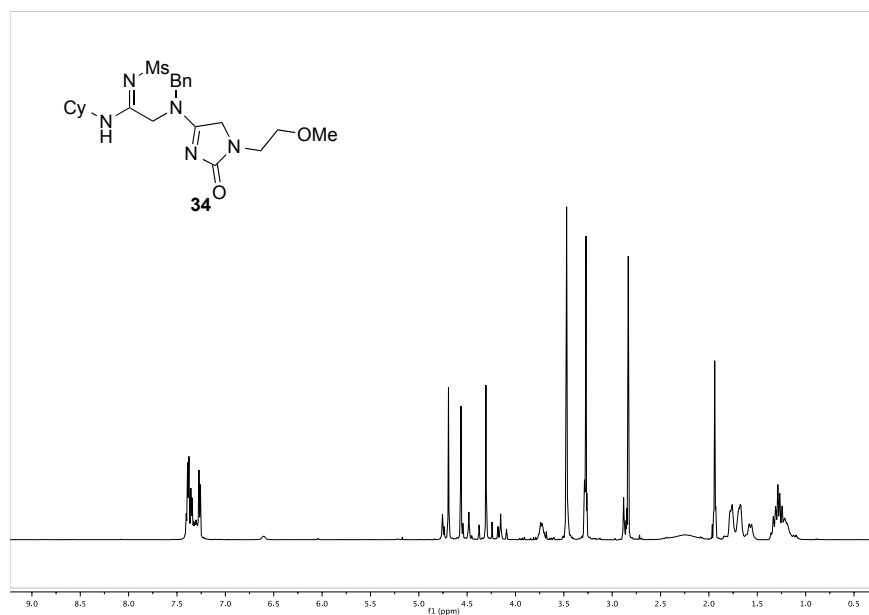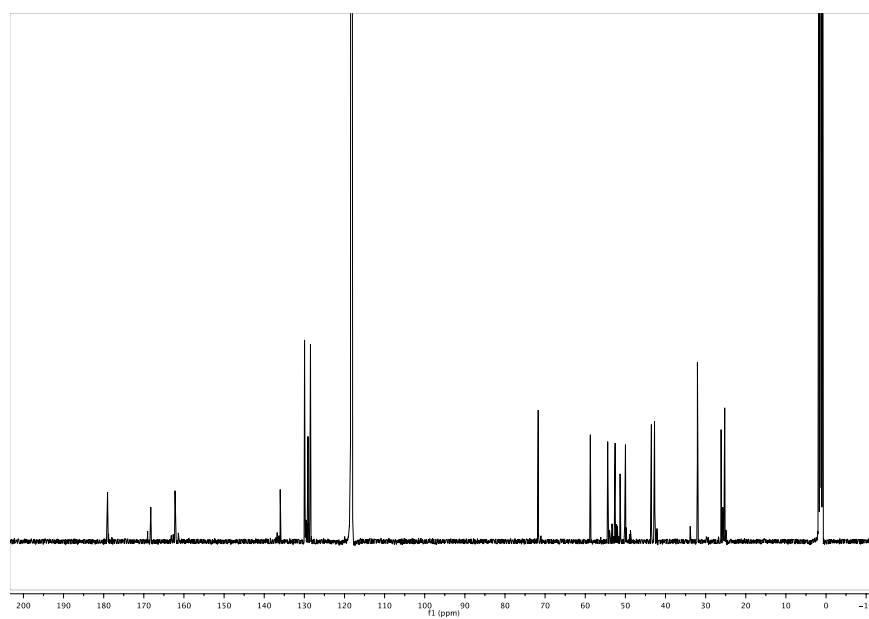

JV\_Long\_Anal\_7\_3\_FORMIC ACID

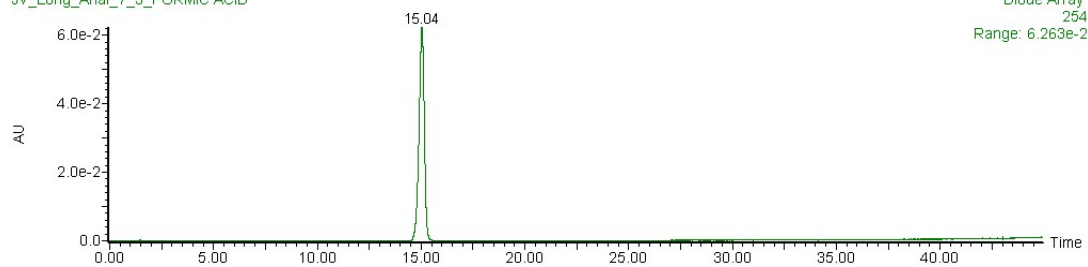

Diode Array  
254  
Range: 6.263e-2

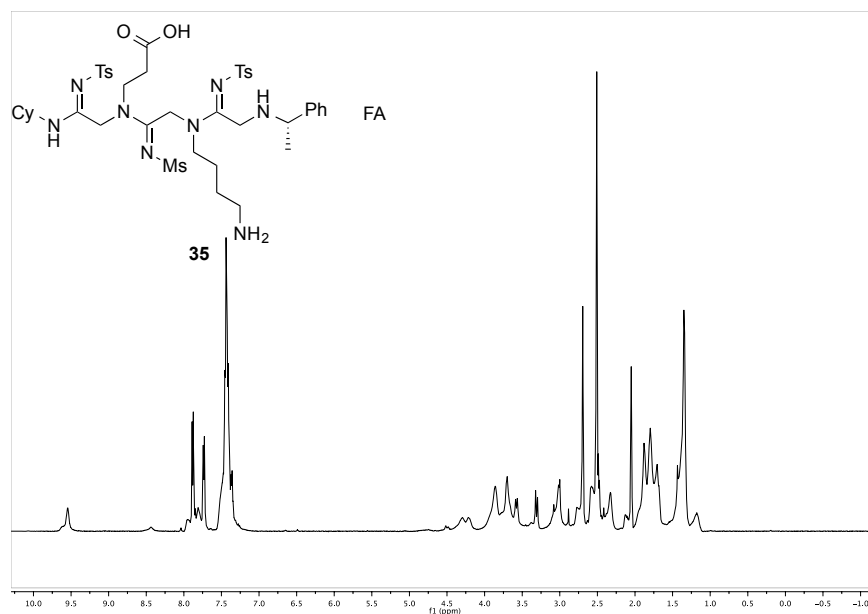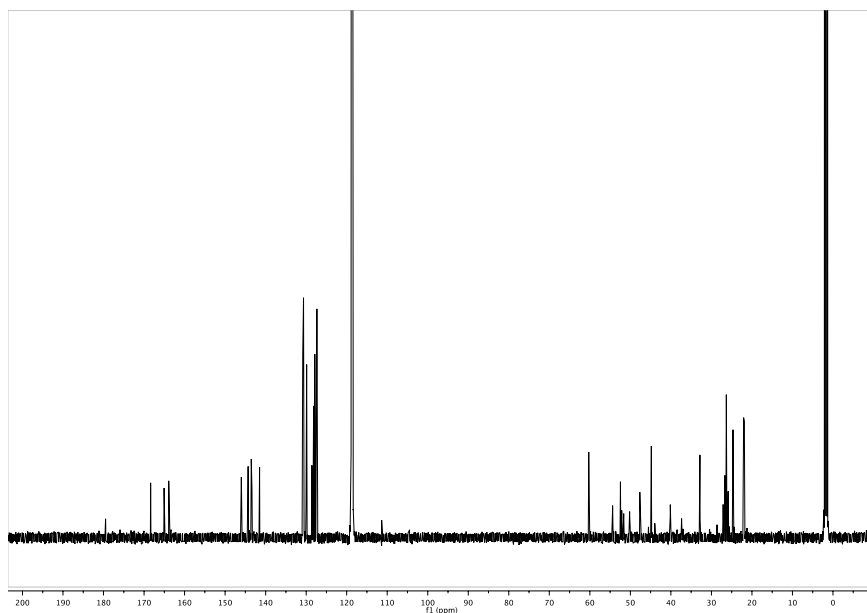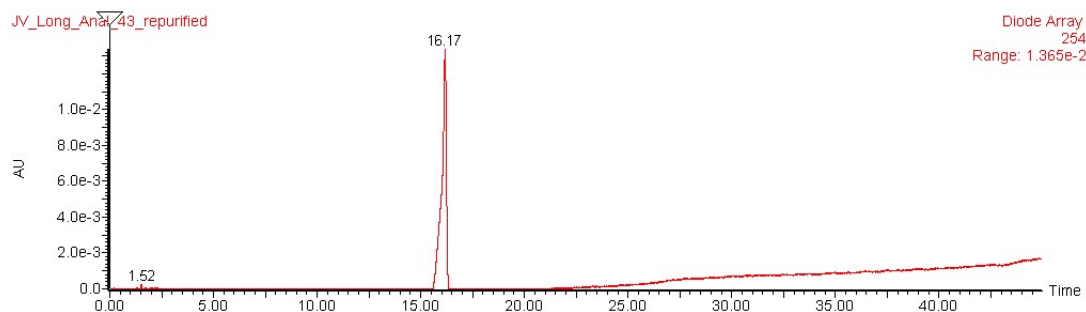

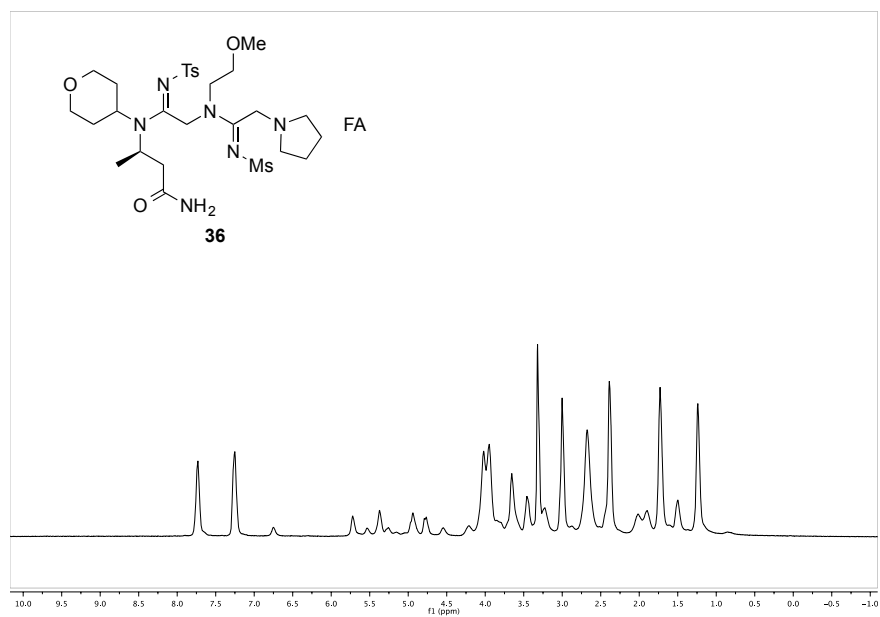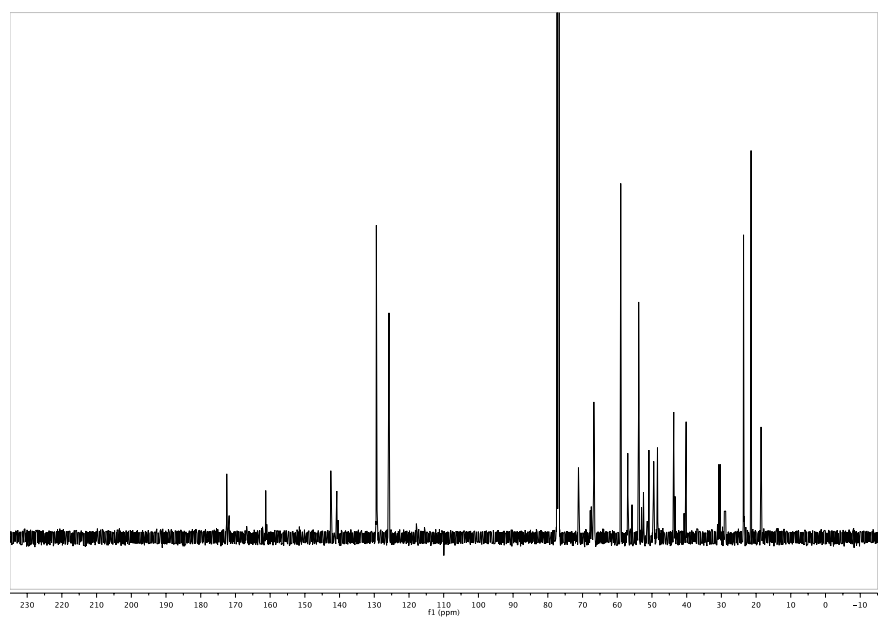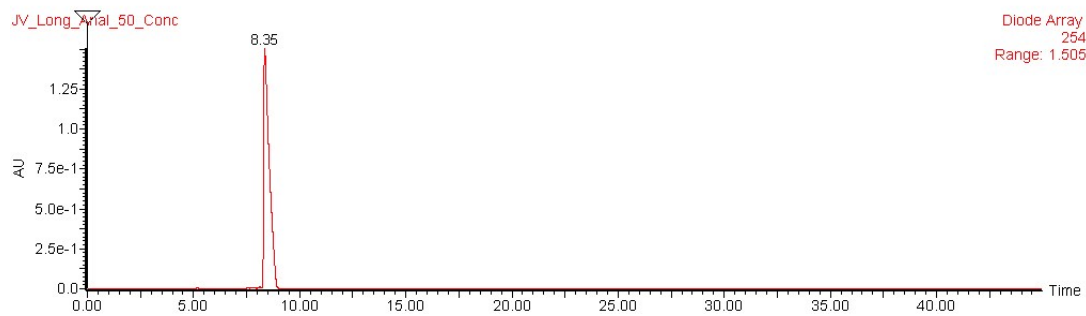

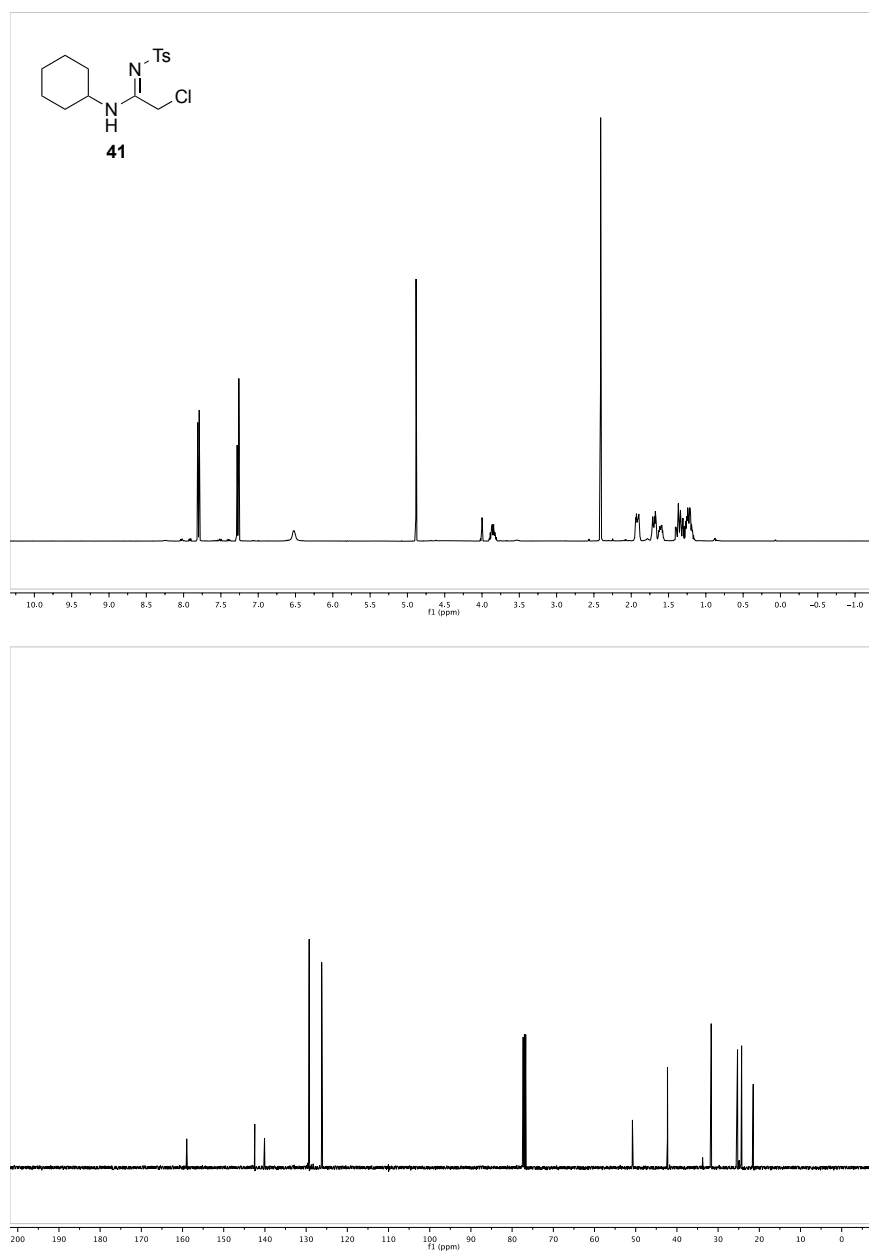

Supplement: c5sc03882k1.pdf [file c5sc03882k1.pdf]
